# Supplementary material for: Transition metal- and oxidant-free [3 + 2] cyclization of azomethine imines utilizing vinylene carbonate as dual synthons
Source: Royal Society of Chemistry journal article supplement (doi:10.1039/d2qo00308b), 2022-01-01
Supplement: d2qo00308b1.pdf [file d2qo00308b1.pdf]

Supporting Information

**Transition Metal- and Oxidant-free [3+2] Cyclization of Azomethine Imines Utilizing  
Vinylene Carbonate as Dual Synthons**

Wen Li, Mengqi Zhang, Jin Yan, Linying Ni, Hua Cao,\* and Xiang Liu\*

<sup>1</sup> Guangdong Cosmetics Engineering & Technology Research Center, School of Chemistry and Chemical Engineering, Guangdong Pharmaceutical University, Zhongshan 528458, China

**Table of Contents:**

---

|                                                      |     |
|------------------------------------------------------|-----|
| 1. General considerations                            | S2  |
| 2. Experimental procedures and characterization data | S3  |
| 2.1 <i>Experimental procedures</i>                   | S3  |
| 2.2 <i>Characterization data</i>                     | S6  |
| 3. NMR spectra for new compounds                     | S19 |
| 4. X-ray crystallographic data                       | S69 |
| 5. References                                        | S72 |

---

## 1. General considerations

Unless otherwise noted, commercial reagents were purchased from Alfa Aesar, TCI, *J&K* or Adamas and used without further purification. All reactions were carried out using oven-dried glassware and all catalytic reactions proceeded without special care. Column chromatography was performed on 200-300 mesh silica gel (Huanghai, China).

$^1\text{H}$ ,  $^{19}\text{F}$  and  $^{13}\text{C}\{^1\text{H}\}$  NMR spectra were recorded on a Bruker Ascend 400 MHz spectrometer and Bruker Ultrashield 300MHz at ambient temperature.  $^1\text{H}$  NMR spectra are referred to the TMS signal ( $\delta = 0$  ppm) and  $^{13}\text{C}$  NMR spectra are referred to the residual solvent signal ( $\delta = 77.16$  ppm). Data for  $^1\text{H}$  NMR are reported as follows: chemical shifts ( $\delta$  ppm), multiplicities (s = singlet, d = doublet, t = triplet, q = quartet, m = multiplet, br = broad), coupling constants (Hz), integration.

The data of HRMS was carried out on a Agilent 7250 GC/Q-TOF high-resolution mass spectrometer. Melting point were recorded using a SGW X-4 Melting Point Apparatus.

## 2. Experimental procedures and characterization data

### 2.1 Experimental procedures

Synthesis of compounds **1** according to the following procedure<sup>1-3</sup>:

Synthesis of compounds **1**, **4** and **7** according to the following procedure:

The substrates azomethine imines are known and were prepared according to the procedures in the literature.<sup>1-3</sup> As exemplified for **1a** and **4a**:

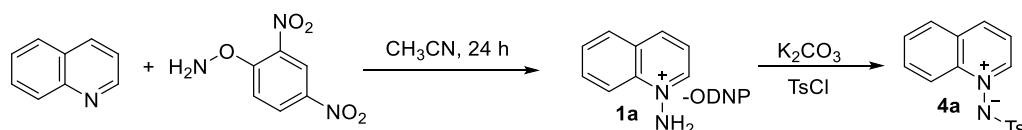

To a solution of quinoline (0.77 g, 6.0 mmol) in acetonitrile (25 mL) was added *O*-(2,4-dinitrophenyl)hydroxylamine (1.3 g, 6.6 mmol). The reaction flask was sealed with rubber plug, and the reaction mixture was stirred for 24 h at room temperature, then upon filtering off the solvent. The orange solid **1a** was obtained, which was carried out to the next step without further purification.

The orange precipitate was dissolved in THF/ H<sub>2</sub>O (30 mL, 1/1, v/v). The reaction mixture was added K<sub>2</sub>CO<sub>3</sub> (2.9 g, 21.0 mmol) at room temperature, and 4-toluenesulfonyl chloride (2.3 g, 12.0 mmol) was slowly added. After 12 h, the reaction was diluted with 20 mL of H<sub>2</sub>O and extracted three times with DCM (30 mL). The combined organic phases were dried over anhydrous Na<sub>2</sub>SO<sub>4</sub>, concentrated under reduced pressure, and purified by column chromatography on silica gel (DCM/CH<sub>3</sub>OH = 20/1, v/v) to afford corresponding product **4a**.

Synthesis of products **3** according to the following procedure:

As exemplified for **3a**:

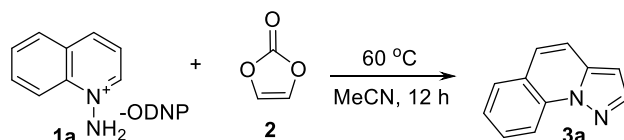

A test tube with 2.0 mL acetonitrile was charged with a stirring bar, *N*-quinolinium 2,4-(dinitro)phenolate (**1a**, 98.4 mg, 0.3 mmol), vinylene carbonate (**2**, 38.7 mg, 0.45 mmol) were added. The reaction was heated with a heating mantle at 60 °C for 12 h. After cooling to room temperature, the solvent was volatilized and the crude product was purified by flash column chromatography on silica gel (eluent: PE/EA = 5/1, v/v), and the target compound **3a** was obtained.

### Synthesis of products 5 and 7 according to the following procedure:

As exemplified for **5a**:

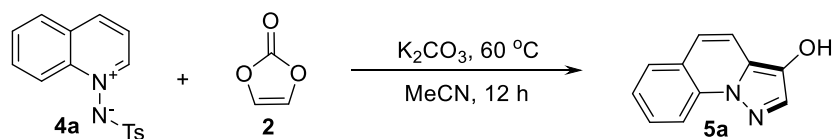

A test tube with 2.0 mL acetonitrile was charged with a stirring bar,  $K_2CO_3$  (82.4 mg, 0.6 mmol) *N*-iminoquinolinium ylides (**4a**, 89.4 mg, 0.3 mmol), vinylene carbonate (**2**, 38.7 mg, 0.45 mmol) were added. The reaction was heated with a heating mantle at  $60\text{ }^\circ\text{C}$  for 12 h. After cooling to room temperature, the solvent was volatilized and the crude product was purified by flash column chromatography on silica gel (eluent: PE/EA = 2/1, v/v), and the target compound **5a** was obtained.

### Large-scale reactions for **3a** and **5a**: As exemplified for **3a**

A pressure tube was charged with *N*-quinolinium 2,4-(dinitro)phenolate (**1a**, 98.4 mg, 1 mmol), vinylene carbonate (**2**, 129.0 mg, 1.5 mmol) and MeCN (20.0 mL) was added and the mixtures were heated with a heating mantle at  $60\text{ }^\circ\text{C}$  for 12 h, then cooled to room temperature. The solvent was volatilized and the crude product was separated by column chromatography (PE:EA = 5:1) to give a pure sample of **3a** in 49% yield (82.3 mg).

### Synthesis of products **8a-8c** according to the following procedure<sup>4</sup>:

As exemplified for **8a**:

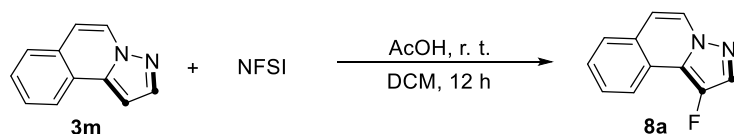

A mixture of the pyrazolo[5,1-*a*]isoquinoline **3m** (50.4 mg, 0.3 mmol), NFSI (129.0 mg, 0.5 mmol) and AcOH (0.1 mmol) in DCM (2 mL) was stirred overnight at rt. The resulting mixture was filtered, and the filtrate was evaporated in vacuo. The residue was purified by flash column chromatography (PE:EA = 5:1), affording the corresponding halogenated product **8a**.

### Synthesis of product **8d** according to the following procedure<sup>4</sup>:

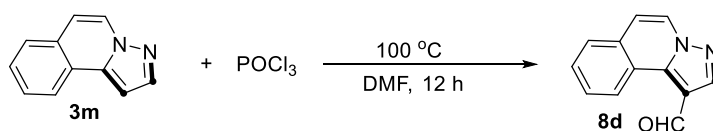

A test tube with 2.0 mL DMF was charged with a stirring bar, pyrazolo[5,1-*a*]isoquinoline **3m** (50.4 mg, 0.3 mmol), POCl<sub>3</sub> (68.9 mg, 0.3 mmol) were added. The reaction was heated with a heating mantle at 100 °C for 12 h. The phases were separated and the aqueous phase was extracted with DCM (25 mL ×2) and the combined organic layer was dried over anhydrous MgSO<sub>4</sub>, filtered, and concentrated in vacuo. Finally, the crude product was purified by flash column chromatography on silica gel (PE:EA = 5:1), affording the corresponding product **8d**.

#### Synthesis of products **8e** and **8f** according to the following procedure<sup>5</sup>:

As exemplified for **8e**:

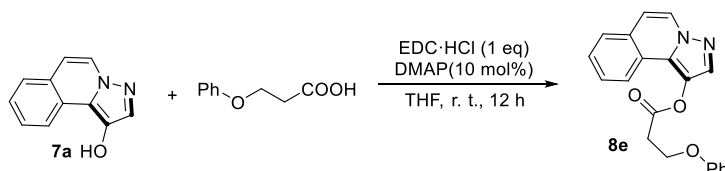

A mixture of the carboxylic acid (0.3 mmol), pyrazolo[5,1-*a*]isoquinolin-1-ol **7a** (55.2 mg, 0.3 mmol), DMAP (0.1 mmol), and 1-ethyl-3-(3-(dimethylamino)propyl)carbodiimide hydrochloride (EDC·HCl, 57.3 mg, 0.3 mmol) in THF (2 mL) was stirred overnight at 25 °C. The resulting mixture was filtered, and the filtrate was evaporated in vacuo. The residue was purified by flash column chromatography (PE:EA = 5:1), affording the corresponding ester **8e**.

## 2.2 Characterization data

### Pyrazolo[1,5-*a*]quinoline (3a)

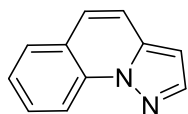

Flash column chromatography on silica gel (eluent: PE/EA = 5/1, v/v) to afford **3a**.

Yellow liquid (42.3 mg, 84%). <sup>1</sup>H NMR (400 MHz, CDCl<sub>3</sub>) δ 8.59 (d, *J* = 8.4 Hz, 1H), 8.03 (d, *J* = 1.7 Hz, 1H), 7.76 (d, *J* = 7.9 Hz, 1H), 7.67 (t, *J* = 7.8 Hz, 1H), 7.49 – 7.39 (m, 3H), 6.62 (d, *J* = 1.9 Hz, 1H). <sup>13</sup>C NMR (100 MHz, CDCl<sub>3</sub>) δ 141.2, 138.1, 134.9, 129.5, 128.5, 124.8, 124.7, 123.4, 116.8, 115.6, 99.9. HRMS GC/QTOF (*m/z*): calcd for C<sub>11</sub>H<sub>8</sub>N<sub>2</sub> [M]: 168.0687, found: 168.0693.

### 7-Methylpyrazolo[1,5-*a*]quinoline (3b)

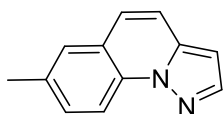

Flash column chromatography on silica gel (eluent: PE/EA = 5/1, v/v) to afford **3b**.

Red liquid (44.2 mg, 81%). <sup>1</sup>H NMR (400 MHz, CDCl<sub>3</sub>) δ 8.47 (d, *J* = 8.5 Hz, 1H), 8.00 (d, *J* = 2.0 Hz, 1H), 7.54 (s, 1H), 7.51 – 7.47 (m, 1H), 7.42 (d, *J* = 9.3 Hz, 1H), 7.35 (d, *J* = 9.3 Hz, 1H), 6.59 (d, *J* = 2.1 Hz, 1H), 2.50 (s, 3H). <sup>13</sup>C NMR (100 MHz, CDCl<sub>3</sub>) δ 140.9, 137.9, 134.5, 133.1, 130.9, 128.1, 124.6, 123.4, 116.7, 115.4, 99.6, 21.3. HRMS GC/QTOF (*m/z*): calcd for C<sub>12</sub>H<sub>10</sub>N<sub>2</sub> [M]: 182.0844, found: 182.0849.

### 7-Fluoropyrazolo[1,5-*a*]quinoline (3c)

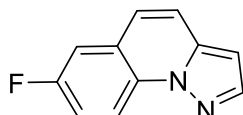

Flash column chromatography on silica gel (eluent: PE/EA = 5/1, v/v) to afford **3c**.

Brown solid (41.8mg, 75%), mp 131.8-132.7 °C. <sup>1</sup>H NMR (400 MHz, CDCl<sub>3</sub>) δ 8.57 (dd, *J* = 8.7, 4.9 Hz, 1H), 8.00 (s, 1H), 7.50 (d, *J* = 9.3 Hz, 1H), 7.40 (dd, *J* = 15.0, 5.8 Hz, 2H), 7.37 – 7.30 (m, 1H), 6.63 (s, 1H). <sup>13</sup>C NMR (100 MHz, CDCl<sub>3</sub>) δ 141.2, 137.8, 131.6 (d, *J* = 5.1 Hz), 124.5 (d, *J* = 8.7 Hz), 123.9 (d, *J* = 3.3 Hz), 118.2, 117.8, 117.7, 117.6 (d, *J* = 2.2 Hz), 113.3, 113.0, 100.2, 94.8. <sup>19</sup>F NMR (376 MHz, CDCl<sub>3</sub>) δ -117.31. HRMS GC/QTOF (*m/z*): calcd for C<sub>11</sub>H<sub>7</sub>FN<sub>2</sub> [M]: 186.0593, found: 186.0600.

### 7-Chloropyrazolo[1,5-*a*]quinoline (3d)

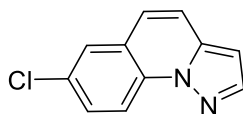

Flash column chromatography on silica gel (eluent: PE/EA = 5/1, v/v) to afford **3d**.

Yellow solid (53.9 mg, 89%), mp 160.9-161.8 °C. <sup>1</sup>H NMR (400 MHz, CDCl<sub>3</sub>) δ 8.48 (d, *J* = 8.9 Hz, 1H), 8.00 (d, *J* = 1.7 Hz, 1H), 7.69 (d, *J* = 1.9 Hz, 1H), 7.58 (dd, *J* = 8.9, 2.1 Hz, 1H), 7.44 (d, *J* = 9.3 Hz, 1H), 7.28 – 7.25 (m, 1H), 6.61 (d, *J* = 1.8 Hz, 1H). <sup>13</sup>C NMR (100 MHz, CDCl<sub>3</sub>) δ 141.5,

137.8, 133.4, 130.3, 129.6, 127.5, 124.4, 123.5, 118.1, 117.1, 100.3. HRMS GC/QTOF (m/z): calcd for  $C_{11}H_7CIN_2$  [M]: 202.0298, found: 202.0298.

### 7-Bromopyrazolo[1,5-a]quinoline (3e)

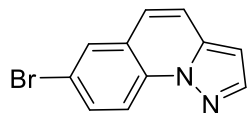

Flash column chromatography on silica gel (eluent: PE/EA = 5/1, v/v) to afford **3e**.

Yellow solid (60.3 mg, 82%), mp 165.7-166.3 °C.  $^1H$  NMR (400 MHz,  $CDCl_3$ )  $\delta$  8.44 (d,  $J$  = 8.9 Hz, 1H), 8.01 (d,  $J$  = 1.7 Hz, 1H), 7.88 (d,  $J$  = 1.8 Hz, 1H), 7.77 – 7.66 (m, 1H), 7.46 (d,  $J$  = 9.3 Hz, 1H), 7.29 (d,  $J$  = 9.3 Hz, 1H), 6.62 (d,  $J$  = 1.8 Hz, 1H).  $^{13}C$  NMR (100 MHz,  $CDCl_3$ )  $\delta$  141.6, 137.2, 133.8, 132.4, 130.6, 124.8, 123.4, 118.1, 117.9, 117.4, 100.4. HRMS GC/QTOF (m/z): calcd for  $C_{11}H_7BrN_2$  [M]: 245.9793, found: 245.9789.

### 7-Phenylpyrazolo[1,5-a]quinoline (3f)

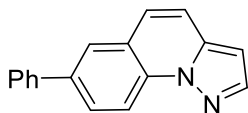

Flash column chromatography on silica gel (eluent: PE/EA = 5/1, v/v) to afford **3f**.

Yellow solid (65.1 mg, 89%), mp 182.1-183.0 °C.  $^1H$  NMR (400 MHz,  $CDCl_3$ )  $\delta$  8.54 (d,  $J$  = 8.6 Hz, 1H), 7.95 (d,  $J$  = 1.9 Hz, 1H), 7.87 – 7.79 (m, 2H), 7.60 (d,  $J$  = 7.7 Hz, 2H), 7.45 – 7.34 (m, 4H), 7.31 (dd,  $J$  = 14.1, 6.6 Hz, 1H), 6.53 (d,  $J$  = 1.9 Hz, 1H).  $^{13}C$  NMR (100 MHz,  $CDCl_3$ )  $\delta$  141.4, 140.3, 138.1, 137.8, 134.3, 129.1, 128.6, 127.6, 127.3, 126.6, 124.8, 123.7, 117.2, 116.0, 99.9. HRMS GC/QTOF (m/z): calcd for  $C_{17}H_{12}N_2$  [M]: 244.1000, found: 244.0996.

### 5-Methylpyrazolo[1,5-a]quinoline (3g)

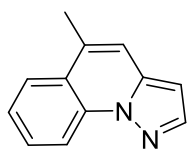

Flash column chromatography on silica gel (eluent: PE/EA = 5/1, v/v) to afford **3g**. Red

solid (36.6 mg, 67%), mp 134.1-134.9 °C.  $^1H$  NMR (400 MHz,  $CDCl_3$ )  $\delta$  8.54 (d,  $J$  = 8.3 Hz, 1H), 7.90 (s, 1H), 7.79 (d,  $J$  = 8.1 Hz, 1H), 7.60 (t,  $J$  = 7.7 Hz, 1H), 7.47 – 7.37 (m, 1H), 7.19 (s, 1H), 6.42 (s, 1H), 2.52 (s, 1H).  $^{13}C$  NMR (100 MHz,  $CDCl_3$ )  $\delta$  141.1, 134.7, 131.5, 129.3, 128.8, 125.3, 124.6, 123.7, 116.0, 115.8, 98.8, 19.3. HRMS GC/QTOF (m/z): calcd for  $C_{12}H_{10}N_2$  [M]: 182.0844, found: 182.0842.

### 4-Methylpyrazolo[1,5-a]quinoline (3h)

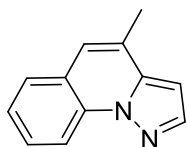

Flash column chromatography on silica gel (eluent:eluent: PE/EA = 5/1, v/v) to afford **3h**. Brown solid (45.3 mg, 83%), mp 77.6-78.5 °C. <sup>1</sup>H NMR (400 MHz, CDCl<sub>3</sub>) δ 8.53 (d, *J* = 8.4 Hz, 1H), 8.02 (d, *J* = 1.9 Hz, 1H), 7.68 (d, *J* = 7.9 Hz, 1H), 7.60 (t, *J* = 7.7 Hz, 1H), 7.41 (t, *J* = 7.5 Hz, 1H), 7.17 (s, 1H), 6.60 (d, *J* = 2.0 Hz, 1H), 2.49 (s, 3H). <sup>13</sup>C NMR (100 MHz, CDCl<sub>3</sub>) δ 141.1, 139.8, 133.8, 128.4, 127.7, 126.3, 124.8, 123.8, 122.8, 115.4, 98.6, 18.6. HRMS GC/QTOF (m/z): calcd for C<sub>12</sub>H<sub>10</sub>N<sub>2</sub> [M]: 182.0844, found: 182.0852.

### 6-Methoxypyrazolo[1,5-*a*]quinoline (**3i**)

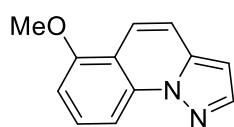

Flash column chromatography on silica gel (eluent: PE/EA = 5/1, v/v) to afford **3i**.

Yellow solid (46.3 mg, 78%), mp 143.3-144.2 °C. <sup>1</sup>H NMR (400 MHz, CDCl<sub>3</sub>) δ 8.19 (d, *J* = 8.5 Hz, 1H), 8.02 (d, *J* = 1.9 Hz, 1H), 7.85 (d, *J* = 9.5 Hz, 1H), 7.60 (t, *J* = 8.3 Hz, 1H), 7.43 (d, *J* = 9.5 Hz, 1H), 6.88 (d, *J* = 8.1 Hz, 1H), 6.61 (d, *J* = 2.0 Hz, 1H), 4.01 (s, 3H). <sup>13</sup>C NMR (100 MHz, CDCl<sub>3</sub>) δ 156.3, 141.2, 138.4, 135.7, 129.9, 119.1, 115.4, 114.4, 108.1, 104.8, 99.5, 56.0. HRMS GC/QTOF (m/z): calcd for C<sub>12</sub>H<sub>10</sub>N<sub>2</sub>O [M]: 198.0793, found: 198.0799.

### 6-Chloropyrazolo[1,5-*a*]quinoline (**3j**)

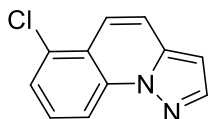

Flash column chromatography on silica gel (eluent: PE/EA = 5/1, v/v) to afford **3j**.

Yellow solid (45.4 mg, 75%), mp 134.2-135.1 °C. <sup>1</sup>H NMR (400 MHz, CDCl<sub>3</sub>) δ 8.53 (d, *J* = 8.3 Hz, 1H), 8.04 (s, 1H), 7.83 (d, *J* = 9.6 Hz, 1H), 7.54 (dt, *J* = 14.5, 7.8 Hz, 3H), 6.65 (s, 1H). <sup>13</sup>C NMR (100 MHz, CDCl<sub>3</sub>) δ 141.9, 137.9, 136.0, 132.7, 129.4, 125.3, 121.4, 120.8, 117.8, 114.6, 100.3. HRMS GC/QTOF (m/z): calcd for C<sub>11</sub>H<sub>7</sub>ClN<sub>2</sub> [M]: 202.0298, found: 202.0306.

### 2-(4-Methoxyphenyl)-[1,2,4]triazolo[1,5-*a*]quinoline (**3k**)

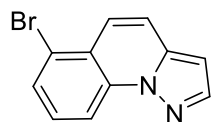

Flash column chromatography on silica gel (eluent: PE/EA = 5/1, v/v) to afford **3k**.

Brown solid (58.1 mg, 79%), mp 157.2-158.1. <sup>1</sup>H NMR (400 MHz, CDCl<sub>3</sub>) δ 8.57 (d, *J* = 8.4 Hz, 1H), 8.04 (d, *J* = 1.9 Hz, 1H), 7.79 (d, *J* = 9.6 Hz, 1H), 7.69 (d, *J* = 7.8 Hz, 1H), 7.50 (dd, *J* = 16.7, 8.8 Hz, 2H), 6.64 (d, *J* = 2.0 Hz, 1H). <sup>13</sup>C NMR (100 MHz, CDCl<sub>3</sub>) δ 141.9, 137.8, 135.9, 129.8, 128.8, 123.5, 123.0, 122.7, 118.0, 115.3, 100.3. HRMS GC/QTOF (m/z): calcd for C<sub>11</sub>H<sub>7</sub>BrN<sub>2</sub> [M]: 245.9793, found: 245.9789.

### 6-(4-Methoxyphenyl)pyrazolo[1,5-*a*]quinoline (**3l**)



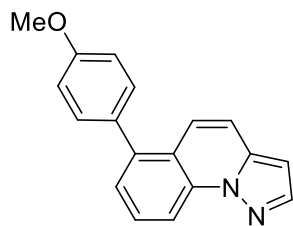

Flash column chromatography on silica gel (eluent: PE/EA = 5/1, v/v) to afford **3l**. Yellow solid (69.9 mg, 85%), mp 194.2-195.1 °C. <sup>1</sup>H NMR (400 MHz, CDCl<sub>3</sub>) δ 8.62 (d, *J* = 8.4 Hz, 1H), 8.03 (d, *J* = 1.8 Hz, 1H), 7.68 (t, *J* = 7.9 Hz, 1H), 7.50 (d, *J* = 9.6 Hz, 1H), 7.38 (dd, *J* = 8.8, 3.5 Hz, 4H), 7.04 (d, *J* = 8.5 Hz, 2H), 6.60 (d, *J* = 1.8 Hz, 1H), 3.90 (s, 3H). <sup>13</sup>C NMR (100 MHz, CDCl<sub>3</sub>) δ 159.4, 141.4, 141.2, 137.7, 135.43, 132.3, 131.2, 128.9, 126.1, 122.8, 121.5, 116.4, 114.6, 113.9, 99.6, 55.5. HRMS GC/QTOF (*m/z*): calcd for C<sub>18</sub>H<sub>14</sub>N<sub>2</sub>O [M]: 274.1106, found: 274.1101.

### Pyrazolo[5,1-*a*]isoquinoline (3m)

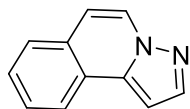

Flash column chromatography on silica gel (eluent: PE/EA = 5/1, v/v) to afford **3m**. Yellow solid (40.8 mg, 81%), mp 80.5-81.3 °C. <sup>1</sup>H NMR (400 MHz, CDCl<sub>3</sub>) δ 8.27 (d, *J* = 7.4 Hz, 1H), 8.10 (d, *J* = 7.4 Hz, 1H), 7.98 (d, *J* = 1.8 Hz, 1H), 7.74 – 7.68 (m, 1H), 7.56 (dq, *J* = 7.3, 5.8 Hz, 2H), 7.00 (dd, *J* = 4.4, 2.7 Hz, 2H). <sup>13</sup>C NMR (100 MHz, CDCl<sub>3</sub>) δ 141.3, 138.5, 128.8, 128.0, 127.8, 127.3, 126.5, 124.7, 123.8, 112.3, 97.7. HRMS GC/QTOF (*m/z*): calcd for C<sub>11</sub>H<sub>8</sub>N<sub>2</sub> [M]: 168.0687, found: 168.0690.

### 8-Methylpyrazolo[5,1-*a*]isoquinoline (3n)

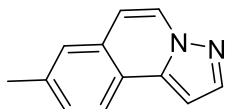

Flash column chromatography on silica gel (eluent: PE/EA = 5/1, v/v) to afford **3n**. Yellow solid (45.3 mg, 83%), mp 117.6-118.5. <sup>1</sup>H NMR (400 MHz, CDCl<sub>3</sub>) δ 8.15 (d, *J* = 7.4 Hz, 1H), 7.89 (dd, *J* = 13.4, 4.8 Hz, 2H), 7.42 (s, 1H), 7.31 (d, *J* = 8.1 Hz, 1H), 6.85 (d, *J* = 7.1 Hz, 2H), 2.43 (s, 3H). <sup>13</sup>C NMR (100 MHz, CDCl<sub>3</sub>) δ 141.2, 138.6, 138.1, 129.3, 129.0, 127.1, 126.5, 123.7, 122.5, 112.1, 97.1, 21.7. HRMS GC/QTOF (*m/z*): calcd for C<sub>12</sub>H<sub>10</sub>N<sub>2</sub> [M]: 182.0844, found: 182.0848.

### 8-Chloropyrazolo[5,1-*a*]isoquinoline (3o)

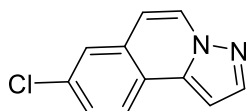

Flash column chromatography on silica gel (eluent: PE/EA = 5/1, v/v) to afford **3o**. Yellow solid (47.9 mg, 79%), mp 181.1-182.0 °C. <sup>1</sup>H NMR (400 MHz, CDCl<sub>3</sub>) δ 8.28 (d, *J* = 6.5 Hz, 1H), 8.05 – 7.94 (m, 2H), 7.71 (s, 1H), 7.53 (d, *J* = 8.3 Hz, 1H), 7.01 – 6.87 (m, 2H). <sup>13</sup>C NMR (100 MHz, CDCl<sub>3</sub>) δ 141.7, 137.9, 133.8, 130.1, 128.2, 127.6, 126.6, 125.3, 123.1, 111.1, 97.9. HRMS GC/QTOF (*m/z*): calcd for C<sub>11</sub>H<sub>7</sub>ClN<sub>2</sub> [M]: 202.0298, found: 202.0292.

### 8-Bromopyrazolo[5,1-*a*]isoquinoline (**3p**)

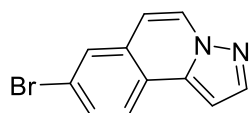

Flash column chromatography on silica gel (eluent: PE/EA = 5/1, v/v) to afford **3p**.

Yellow solid (61.7 mg, 84%), mp 163.5-164.3. <sup>1</sup>H NMR (400 MHz, CDCl<sub>3</sub>) δ 8.25 (d, *J* = 7.4 Hz, 1H), 7.98 (d, *J* = 1.5 Hz, 1H), 7.92 (d, *J* = 8.5 Hz, 1H), 7.84 (d, *J* = 1.4 Hz, 1H), 7.63 (dd, *J* = 8.5, 1.6 Hz, 1H), 6.96 (s, 1H), 6.87 (d, *J* = 7.4 Hz, 1H). <sup>13</sup>C NMR (100 MHz, CDCl<sub>3</sub>) δ 141.6, 137.9, 130.8, 130.3, 129.6, 127.6, 125.4, 123.3, 121.9, 111.0, 97.9. HRMS GC/QTOF (*m/z*): calcd for C<sub>11</sub>H<sub>7</sub>BrN<sub>2</sub> [M]: 245.9793, found: 245.9802.

### 8-Phenylpyrazolo[5,1-*a*]isoquinoline (**3q**)

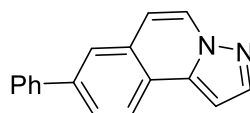

Flash column chromatography on silica gel (eluent: PE/EA = 5/1, v/v) to afford **3q**.

White solid (59.3 mg, 81%), mp 182.1-183.1 °C. <sup>1</sup>H NMR (400 MHz, CDCl<sub>3</sub>) δ 8.29 (d, *J* = 7.4 Hz, 1H), 8.15 (d, *J* = 8.3 Hz, 1H), 7.99 (d, *J* = 1.6 Hz, 1H), 7.91 (s, 1H), 7.81 (dd, *J* = 8.3, 1.3 Hz, 1H), 7.69 (d, *J* = 7.4 Hz, 2H), 7.50 (t, *J* = 7.6 Hz, 2H), 7.41 (t, *J* = 7.3 Hz, 1H), 7.05 (d, *J* = 7.4 Hz, 1H), 7.01 (s, 1H). <sup>13</sup>C NMR (100 MHz, CDCl<sub>3</sub>) δ 141.4, 140.9, 140.4, 138.4, 129.3, 129.1, 127.9, 127.4, 127.1, 126.8, 125.5, 124.4, 123.7, 112.4, 97.8. HRMS GC/QTOF (*m/z*): calcd for C<sub>17</sub>H<sub>12</sub>N<sub>2</sub> [M]: 244.1000, found: 244.1008.

### 8-(Thiophen-2-yl)pyrazolo[5,1-*a*]isoquinoline (**3r**)

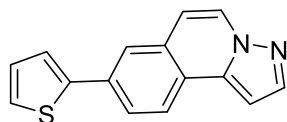

Flash column chromatography on silica gel (eluent: PE/EA = 5/1, v/v) to afford

**3r**. Yellow solid (54.8 mg, 73%), mp 238.8-239.5 °C. <sup>1</sup>H NMR (400 MHz, CDCl<sub>3</sub>) δ 8.08 (d, *J* = 8.4 Hz, 1H), 7.98 (d, *J* = 2.0 Hz, 1H), 7.91 (s, 1H), 7.82 (dd, *J* = 8.4, 1.6 Hz, 1H), 7.44 (d, *J* = 3.6 Hz, 1H), 7.36 (d, *J* = 5.1 Hz, 1H), 7.14 (dd, *J* = 4.9, 3.8 Hz, 1H), 6.99 (dd, *J* = 11.4, 4.7 Hz, 2H). <sup>13</sup>C NMR (100 MHz, CDCl<sub>3</sub>) δ 143.6, 141.4, 138.3, 134.1, 129.4, 128.4, 127.0, 125.8, 125.8, 124.5, 124.0, 123.9, 123.7, 112.2, 97.8. HRMS GC/QTOF (*m/z*): calcd for C<sub>15</sub>H<sub>10</sub>N<sub>2</sub>S [M]: 250.0565, found: 250.0559.

### 9-Bromopyrazolo[5,1-*a*]isoquinoline (**3s**)

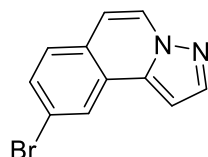

Flash column chromatography on silica gel (eluent: PE/EA = 5/1, v/v) to afford **3s**.

Yellow solid (64.7 mg, 88%), mp 133.9-134.8 °C. <sup>1</sup>H NMR (400 MHz, CDCl<sub>3</sub>) δ 8.23 (d,

$J = 7.4$  Hz, 1H), 8.17 (s, 1H), 7.97 (d,  $J = 1.6$  Hz, 1H), 7.58 (dd,  $J = 8.5, 1.5$  Hz, 1H), 7.52 (d,  $J = 8.5$  Hz, 1H), 6.93 (d,  $J = 1.3$  Hz, 1H), 6.89 (d,  $J = 7.4$  Hz, 1H).  $^{13}\text{C}$  NMR (100 MHz,  $\text{CDCl}_3$ )  $\delta$  141.5, 137.2, 131.0, 128.7, 127.4, 126.8, 126.3, 126.0, 121.5, 111.5, 98.1. HRMS GC/QTOF ( $m/z$ ): calcd for  $\text{C}_{11}\text{H}_7\text{BrN}_2$  [M]: 245.9793, found: 245.9789.

### 10-Chloropyrazolo[5,1-*a*]isoquinoline (3t)

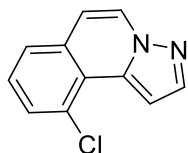

Flash column chromatography on silica gel (eluent: PE/EA = 5/1, v/v) to afford **3t**.

Yellow solid (52.7 mg, 87%), mp 179.3-180.2 °C.  $^1\text{H}$  NMR (400 MHz,  $\text{CDCl}_3$ )  $\delta$  8.27 (d,

$J = 7.2$  Hz, 1H), 8.02 (s, 1H), 7.66 (s, 1H), 7.58 (t,  $J = 8.2$  Hz, 2H), 7.40 (t,  $J = 7.6$  Hz,

1H), 6.93 (d,  $J = 7.1$  Hz, 1H).  $^{13}\text{C}$  NMR (100 MHz,  $\text{CDCl}_3$ )  $\delta$  141.3, 135.8, 131.4, 130.8, 129.5, 127.8, 127.5,

126.1, 123.0, 112.0, 103.6. HRMS GC/QTOF ( $m/z$ ): calcd for  $\text{C}_{11}\text{H}_7\text{ClN}_2$  [M]: 202.0298, found: 202.0292.

### 10-Bromopyrazolo[5,1-*a*]isoquinoline (3u)

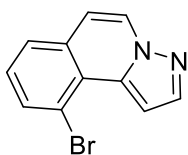

Flash column chromatography on silica gel (eluent: PE/EA = 5/1, v/v) to afford **3u**.

Yellow solid (61.0 mg, 83%), mp 174.1-174.9 °C.  $^1\text{H}$  NMR (400 MHz,  $\text{CDCl}_3$ )  $\delta$  8.28 (d,

$J = 7.3$  Hz, 1H), 8.02 (d,  $J = 2.0$  Hz, 1H), 7.93 (d,  $J = 1.7$  Hz, 1H), 7.84 (d,  $J = 7.8$  Hz,

1H), 7.65 (d,  $J = 7.7$  Hz, 1H), 7.33 (t,  $J = 7.8$  Hz, 1H), 6.95 (d,  $J = 7.3$  Hz, 1H).  $^{13}\text{C}$  NMR (100 MHz,  $\text{CDCl}_3$ )

$\delta$  140.9, 136.6, 133.5, 131.7, 128.1, 127.5, 126.9, 124.5, 119.7, 112.2, 103.4. HRMS GC/QTOF ( $m/z$ ): calcd

for  $\text{C}_{11}\text{H}_7\text{BrN}_2$  [M]: 245.9793, found: 245.9801.

### 7-Bromopyrazolo[5,1-*a*]isoquinoline (3v)

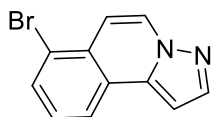

Flash column chromatography on silica gel (eluent: PE/EA = 5/1, v/v) to afford **3v**.

Yellow solid (66.2 mg, 90%), mp 157.2-158.1 °C.  $^1\text{H}$  NMR (400 MHz,  $\text{CDCl}_3$ )  $\delta$  8.27

(d,  $J = 7.7$  Hz, 1H), 7.98 (t,  $J = 10.7$  Hz, 1H), 7.73 (d,  $J = 7.7$  Hz, 1H), 7.34 (td,  $J = 7.9,$

3.3 Hz, 1H), 6.95 (s, 1H).  $^{13}\text{C}$  NMR (100 MHz,  $\text{CDCl}_3$ )  $\delta$  141.8, 137.8, 137.8, 131.8, 128.3, 128.3, 127.6,

126.0, 123.2, 122.3, 110.8, 98.3. HRMS GC/QTOF ( $m/z$ ): calcd for  $\text{C}_{11}\text{H}_7\text{BrN}_2$  [M]: 245.9793, found:

245.9789.

### Pyrazolo[5,1-*a*]isoquinolin-7-ol (3w)

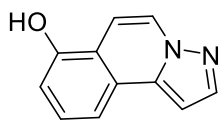

Flash column chromatography on silica gel (eluent: PE/EA = 5/1, v/v) to afford **3w**.

Yellow solid (33.7 mg, 61%), mp 171.7-172.6 °C. <sup>1</sup>H NMR (400 MHz, CDCl<sub>3</sub>) δ 8.26

(d, *J* = 7.5 Hz, 1H), 8.00 (s, 1H), 7.66 (d, *J* = 7.9 Hz, 1H), 7.48 – 7.38 (m, 2H), 6.98 (s,

2H). <sup>13</sup>C NMR (100 MHz, CDCl<sub>3</sub>) δ 152.4, 141.0, 138.4, 128.6, 126.0, 125.3, 118.7, 115.9, 112.6, 106.9, 97.9.

HRMS GC/QTOF (m/z): calcd for C<sub>11</sub>H<sub>8</sub>N<sub>2</sub>O [M]: 184.0637, found: 184.0629.

#### Pyrazolo[1,5-*a*]quinolin-3-ol (**5a**)

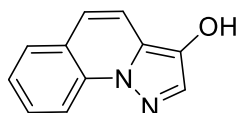

Flash column chromatography on silica gel (eluent: PE/EA = 2/1, v/v) to afford **5a**.

Brown solid (43.6 mg, 79%), mp 192.6-193.4 °C. <sup>1</sup>H NMR (400 MHz, Methanol-D<sub>4</sub>)

δ 8.25 (d, *J* = 8.3 Hz, 1H), 7.62 (d, *J* = 8.2 Hz, 2H), 7.59 – 7.49 (m, 1H), 7.42 – 7.27 (m, 2H), 7.16 (d, *J* = 9.3

Hz, 1H). <sup>13</sup>C NMR (100 MHz, Methanol-D<sub>4</sub>) δ 136.5, 135.8, 130.4, 130.2, 129.7, 127.5, 125.7, 124.9, 122.8,

115.8, 115.1. HRMS GC/QTOF (m/z): calcd for C<sub>11</sub>H<sub>8</sub>N<sub>2</sub>O [M]: 184.0637, found: 184.0629.

#### 7-Methylpyrazolo[1,5-*a*]quinolin-3-ol (**5b**)

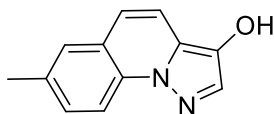

Flash column chromatography on silica gel (eluent: PE/EA = 2/1, v/v) to afford **5b**.

Brown solid (40.4 mg, 68%), mp 220.4-221.3 °C. <sup>1</sup>H NMR (400 MHz,

Methanol-D<sub>4</sub>) δ 8.16 (d, *J* = 8.4 Hz, 1H), 7.60 (s, 1H), 7.48 (s, 1H), 7.42 – 7.30 (m, 2H), 7.17 (d, *J* = 9.3 Hz,

1H), 2.40 (s, 3H). <sup>13</sup>C NMR (100 MHz, Methanol-D<sub>4</sub>) δ 136.4, 135.8, 133.9, 131.5, 129.9, 129.4, 127.4,

125.0, 122.8, 115.7, 115.0, 21.1. HRMS GC/QTOF (m/z): calcd for C<sub>12</sub>H<sub>10</sub>N<sub>2</sub>O [M]: 198.0793, found:

198.0792.

#### 7-Methoxypyrazolo[1,5-*a*]quinolin-3-ol (**5c**)

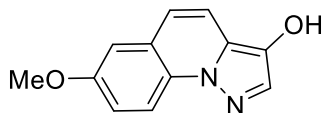

Flash column chromatography on silica gel (eluent: PE/EA = 2/1, v/v) to

afford **5c**. Yellow solid (46.2 mg, 72%), mp 193.2-194.1 °C. <sup>1</sup>H NMR (400

MHz, Acetone-D<sub>6</sub>) δ 8.33 (d, *J* = 9.1 Hz, 1H), 7.62 (d, *J* = 6.2 Hz, 1H), 7.47 (d, *J* = 9.4 Hz, 1H), 7.31 (d, *J* =

2.6 Hz, 1H), 7.27 – 7.22 (m, 2H), 3.90 (s, 3H). <sup>13</sup>C NMR (100 MHz, Acetone-D<sub>6</sub>) δ 157.6, 136.0, 130.4,

129.4, 125.9, 125.5, 121.6, 118.7, 116.5, 116.4, 110.8, 55.9. HRMS GC/QTOF (m/z): calcd for C<sub>12</sub>H<sub>10</sub>N<sub>2</sub>O<sub>2</sub>

[M]: 214.0742, found: 214.0745.

#### 7-Fluoropyrazolo[1,5-*a*]quinolin-3-ol (**5d**)

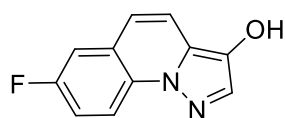

Flash column chromatography on silica gel (eluent: PE/EA = 2/1, v/v) to afford

**5d**. Yellow solid (44.2 mg, 73%), mp 215.6-216.5 °C. <sup>1</sup>H NMR (400 MHz,

Methanol-D<sub>4</sub>) δ 8.24 (dd, *J* = 8.5, 4.7 Hz, 1H), 7.60 (s, 1H), 7.39 (t, *J* = 8.0 Hz, 2H), 7.31 (t, *J* = 8.7 Hz, 1H), 7.13 (d, *J* = 9.2 Hz, 1H). <sup>13</sup>C NMR (100 MHz, Methanol-D<sub>4</sub>) δ 160.9 (d, *J* = 242.4 Hz), 136.8, 132.5, 130.3, 127.1, 126.3 (d, *J* = 8.9 Hz), 121.8 (d, *J* = 3.1 Hz), 17.9 (d, *J* = 24.8 Hz), 117.3, 117.2, 117.2, 114.3 (d, *J* = 23.1 Hz). <sup>19</sup>F NMR (376 MHz, Methanol-D<sub>4</sub>) δ -119.63 (m). HRMS GC/QTOF (*m/z*): calcd for C<sub>11</sub>H<sub>7</sub>FN<sub>2</sub>O [M]: 202.0542, found: 202.0534.

#### 7-Chloropyrazolo[1,5-*a*]quinolin-3-ol (5e)

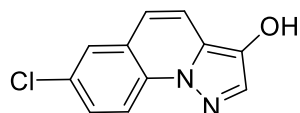

Flash column chromatography on silica gel (eluent: PE/EA = 2/1, v/v) to afford

**5e**. Yellow solid (42.5 mg, 65%), mp 225.4-225.8 °C. <sup>1</sup>H NMR (400 MHz,

Acetone-D<sub>6</sub>) δ 8.38 (d, *J* = 8.9 Hz, 1H), 8.28 (s, 1H), 7.84 (d, *J* = 2.0 Hz, 1H), 7.70 (s, 1H), 7.62 (dd, *J* = 8.9, 2.1 Hz, 1H), 7.53 (d, *J* = 9.4 Hz, 1H), 7.26 (d, *J* = 9.4 Hz, 1H). <sup>13</sup>C NMR (100 MHz, Acetone-D<sub>6</sub>) δ 136.6, 134.4, 130.9, 130.2, 129.9, 128.4, 126.2, 125.8, 120.7, 117.4, 117.0. HRMS GC/QTOF (*m/z*): calcd for C<sub>11</sub>H<sub>7</sub>ClN<sub>2</sub>O [M]: 218.0247, found: 218.0240.

#### 7-Bromopyrazolo[1,5-*a*]quinolin-3-ol (5f)

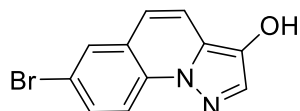

Flash column chromatography on silica gel (eluent: PE/EA = 2/1, v/v) to afford

**5f**. Brown solid (55.6 mg, 71%), mp 219.3-219.9. <sup>1</sup>H NMR (400 MHz,

Methanol-D<sub>4</sub>) δ 8.25 – 8.09 (m, 1H), 7.61 (dt, *J* = 28.6, 13.9 Hz, 2H), 7.52 – 7.43 (m, 1H), 7.37 (dd, *J* = 10.7, 8.2 Hz, 1H), 7.04 (dd, *J* = 31.8, 29.0 Hz, 1H). <sup>13</sup>C NMR (100 MHz, Methanol-D<sub>4</sub>) δ 136.9, 134.4, 131.1, 130.8, 130.1, 128.7, 127.1, 126.2, 121.5, 117.3, 116.8. HRMS GC/QTOF (*m/z*): calcd for C<sub>11</sub>H<sub>7</sub>BrN<sub>2</sub>O [M]: 261.9742, found: 261.9741.

#### 4-Methylpyrazolo[1,5-*a*]quinolin-3-ol (5g)

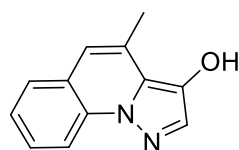

Flash column chromatography on silica gel (eluent: PE/EA = 2/1, v/v) to afford **5g**.

Yellow solid (42.8 mg, 72%), mp 185.6-186.4 °C. <sup>1</sup>H NMR (400 MHz, Methanol-D<sub>4</sub>)

δ 8.21 (d, *J* = 8.3 Hz, 1H), 7.58 (d, *J* = 10.0 Hz, 1H), 7.54 (d, *J* = 7.8 Hz, 1H), 7.47 (t,

$J = 7.7$  Hz, 1H), 7.29 (t,  $J = 7.5$  Hz, 1H), 6.84 (s, 1H), 2.56 (s, 3H).  $^{13}\text{C}$  NMR (100 MHz, Methanol-D4)  $\delta$  137.9, 134.7, 130.7, 129.1, 128.8, 128.7, 127.7, 125.7, 125.4, 121.3, 114.9, 18.3. HRMS GC/QTOF ( $m/z$ ): calcd for  $\text{C}_{12}\text{H}_{10}\text{N}_2\text{O}$  [M]: 198.0793, found: 198.0786.

#### 6-Methoxypyrazolo[1,5-*a*]quinolin-3-ol (5h)

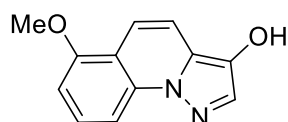

Flash column chromatography on silica gel (eluent: PE/EA = 2/1, v/v) to afford **5h**. Yellow solid (44.3 mg, 69%), mp 223.4-224.2 °C.  $^1\text{H}$  NMR (400 MHz, Methanol-D4)  $\delta$  7.87 (d,  $J = 8.5$  Hz, 1H), 7.65 (s, 1H), 7.56 (t,  $J = 7.5$  Hz, 1H), 7.50 (t,  $J = 8.3$  Hz, 1H), 7.35 (dd,  $J = 9.3, 4.3$  Hz, 1H), 6.89 (t,  $J = 7.1$  Hz, 1H), 3.95 (s, 3H).  $^{13}\text{C}$  NMR (100 MHz, Methanol-D4)  $\delta$  157.7, 136.5, 136.2, 130.9, 130.5, 127.7, 116.9, 115.5, 114.4, 107.6, 106.1, 56.5. HRMS GC/QTOF ( $m/z$ ): calcd for  $\text{C}_{12}\text{H}_{10}\text{N}_2\text{O}_2$  [M]: 214.0742, found: 214.0736.

#### 6-Chloropyrazolo[1,5-*a*]quinolin-3-ol (5i)

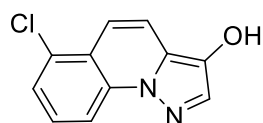

Flash column chromatography on silica gel (eluent: PE/EA = 2/1, v/v) to afford **5i**. Yellow solid (47.7 mg, 73%), mp 227.8-228.6 °C.  $^1\text{H}$  NMR (400 MHz, Methanol-D4)  $\delta$  7.94 (d,  $J = 4.4$  Hz, 1H), 7.46 – 7.32 (m, 1H), 7.30 – 7.05 (m, 4H).  $^{13}\text{C}$  NMR (100 MHz, Methanol-D4)  $\delta$  137.0, 136.9, 133.5, 131.3, 130.3, 126.9, 126.2, 122.7, 118.1, 117.2, 114.3. HRMS GC/QTOF ( $m/z$ ): calcd for  $\text{C}_{17}\text{H}_{13}\text{BrN}_3$  [M]: 218.0247, found: 218.0239.

#### 6-Bromopyrazolo[1,5-*a*]quinolin-3-ol (5j)

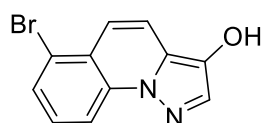

Flash column chromatography on silica gel (eluent: PE/EA = 2/1, v/v) to afford **5j**. Yellow solid (50.9 mg, 65%), mp 238.1-239.0 °C.  $^1\text{H}$  NMR (400 MHz, Methanol-D4)  $\delta$  8.29 (d,  $J = 8.3$  Hz, 1H), 7.66 (s, 1H), 7.61 (t,  $J = 8.4$  Hz, 1H), 7.50 (t,  $J = 7.5$  Hz, 2H), 7.43 (dd,  $J = 14.5, 6.5$  Hz, 1H).  $^{13}\text{C}$  NMR (100 MHz, Methanol-D4)  $\delta$  137.0, 131.4, 130.8, 129.9, 127.2, 126.9, 124.1, 123.8, 120.9, 117.5, 115.1. HRMS GC/QTOF ( $m/z$ ): calcd for  $\text{C}_{17}\text{H}_{13}\text{BrN}_3$  [M]: 261.9742, found: 261.9749.

#### Pyrazolo[5,1-*a*]isoquinolin-1-ol (7a)

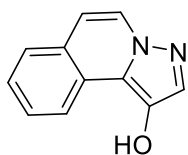

Flash column chromatography on silica gel (eluent: PE/EA = 2/1, v/v) to afford **7a**.

Yellow solid (39.2 mg, 71%), mp 228.2-229.1 °C. <sup>1</sup>H NMR (400 MHz, Acetone-D6) δ 8.57 – 8.46 (m, 2H), 8.08 (d, *J* = 7.5 Hz, 1H), 7.73 (d, *J* = 7.9 Hz, 1H), 7.65 (s, 1H), 7.57

(t, *J* = 7.3 Hz, 1H), 7.48 (t, *J* = 7.4 Hz, 1H), 6.95 (d, *J* = 7.3 Hz, 1H). <sup>13</sup>C NMR (100 MHz, Acetone-D6) δ 137.7, 130.5, 129.0, 128.3, 127.6, 127.6, 127.6, 126.6, 124.2, 123.9, 112.0. HRMS GC/QTOF (*m/z*): calcd for C<sub>11</sub>H<sub>8</sub>N<sub>2</sub>O [M]: 184.0637, found: 184.0628.

### 8-Methylpyrazolo[5,1-*a*]isoquinolin-1-ol (**7b**)

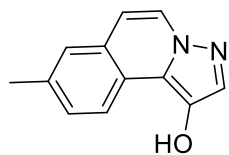

Flash column chromatography on silica gel (eluent: PE/EA = 2/1, v/v) to afford **7b**.

Brown solid (42.8 mg, 72%), mp 243.2-244.1 °C. <sup>1</sup>H NMR (400 MHz, Methanol-D4) δ 8.14 (d, *J* = 8.2 Hz, 1H), 7.71 (t, *J* = 6.9 Hz, 1H), 7.39 (s, 1H), 7.19 – 7.10 (m, 2H),

6.57 (d, *J* = 7.5 Hz, 1H), 2.22 (s, 3H). <sup>13</sup>C NMR (101 MHz, Methanol-D4) δ 138.3, 137.7, 131.5, 130.1, 129.9, 129.6, 127.6, 126.8, 125.6, 124.4, 112.9, 21.6. HRMS GC/QTOF (*m/z*): calcd for C<sub>12</sub>H<sub>10</sub>N<sub>2</sub>O [M]: 198.0793, found: 198.0786.

### 8-Methoxy pyrazolo[5,1-*a*]isoquinolin-1-ol (**7c**)

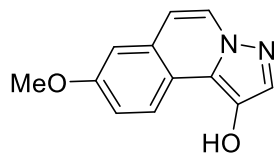

Flash column chromatography on silica gel (eluent: PE/EA = 2/1, v/v) to afford **7c**.

Yellow solid (47.5 mg, 74%), mp 201.9-202.7 °C. <sup>1</sup>H NMR (400 MHz, Acetone-D6) δ 8.42 (d, *J* = 8.8 Hz, 1H), 8.05 (d, *J* = 7.5 Hz, 1H), 7.62 (s, 1H),

7.25 (d, *J* = 5.5 Hz, 1H), 7.22 – 7.14 (m, 1H), 6.89 (d, *J* = 7.5 Hz, 1H), 3.89 (s, 3H). <sup>13</sup>C NMR (100 MHz, Acetone-D6) δ 159.5, 136.5, 130.7, 130.6, 127.9, 125.4, 124.5, 120.5, 117.1, 111.7, 109.5, 55.7. HRMS GC/QTOF (*m/z*): calcd for C<sub>12</sub>H<sub>10</sub>N<sub>2</sub>O<sub>2</sub> [M]: 214.0742, found: 214.0734.

### 8-Chloropyrazolo[5,1-*a*]isoquinolin-1-ol (**7d**)

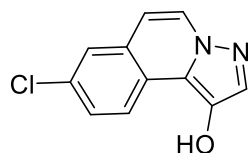

Flash column chromatography on silica gel (eluent: PE/EA = 2/1, v/v) to afford **7d**.

Yellow solid (44.5 mg, 68%), mp 301.2-301.9 °C. <sup>1</sup>H NMR (400 MHz, Methanol-D4) δ 7.83 (d, *J* = 7.4 Hz, 1H), 7.58 (s, 1H), 7.39 (dd, *J* = 11.0, 8.2 Hz,

2H), 7.22 (t, *J* = 7.8 Hz, 1H), 6.65 (d, *J* = 7.4 Hz, 1H). <sup>13</sup>C NMR (100 MHz, Methanol-D4) δ 138.4, 133.1, 133.0, 131.2, 130.2, 128.8, 128.4, 127.0, 125.6, 123.2, 112.5. HRMS GC/QTOF (*m/z*): calcd for C<sub>11</sub>H<sub>7</sub>ClN<sub>2</sub>O [M]: 218.0247, found: 218.0242.

### 8-Bromopyrazolo[5,1-*a*]isoquinolin-1-ol (**7e**)

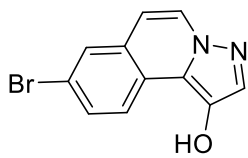

Flash column chromatography on silica gel (eluent: PE/EA = 2/1, v/v) to afford **7e**.

Yellow solid (49.3 mg, 63%), mp 258.7-259.8 °C. <sup>1</sup>H NMR (400 MHz, Acetone-D<sub>6</sub>)

δ 8.77 (s, 1H), 8.39 (d, *J* = 8.5 Hz, 1H), 8.13 (d, *J* = 7.5 Hz, 1H), 7.95 (s, 1H), 7.74 –

7.63 (m, 2H), 6.94 (d, *J* = 7.5 Hz, 1H). <sup>13</sup>C NMR (100 MHz, Acetone-D<sub>6</sub>) δ 137.9, 131.1, 130.8, 130.6, 129.8, 128.8, 125.7, 125.4, 123.5, 120.6, 110.8. HRMS GC/QTOF (*m/z*): calcd for C<sub>11</sub>H<sub>7</sub>BrN<sub>2</sub>O [*M*]: 261.9742, found: 261.9737.

### 9-Bromopyrazolo[5,1-*a*]isoquinolin-1-ol (**7f**)

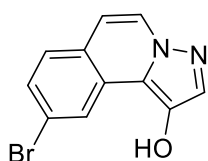

Flash column chromatography on silica gel (eluent: PE/EA = 2/1, v/v) to afford **7f**.

Yellow solid (48.5 mg, 62%), mp 259.2-260.1 °C. <sup>1</sup>H NMR (400 MHz, Acetone-D<sub>6</sub>) δ

8.87 (s, 1H), 8.61 (s, 1H), 8.12 (d, *J* = 7.5 Hz, 1H), 7.72 – 7.66 (m, 2H), 7.61 (d, *J* = 8.5

Hz, 1H), 6.96 (d, *J* = 7.4 Hz, 1H). <sup>13</sup>C NMR (100 MHz, Acetone-D<sub>6</sub>) δ 138.2, 130.4, 129.5, 128.2, 128.1, 127.8, 126.1, 122.8, 121.5, 111.3, 101.0. HRMS GC/QTOF (*m/z*): calcd for C<sub>11</sub>H<sub>7</sub>BrN<sub>2</sub>O [*M*]: 261.9742, found: 261.9749.

### 10-Bromopyrazolo[5,1-*a*]isoquinolin-1-ol (**7g**)

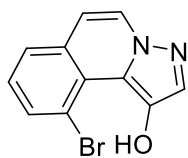

Flash column chromatography on silica gel (eluent: PE/EA = 2/1, v/v) to afford **7g**.

Yellow solid (46.2 mg, 59%), mp 230.1-231.0 °C. <sup>1</sup>H NMR (400 MHz, Methanol-D<sub>4</sub>) δ

7.86 (d, *J* = 7.3 Hz, 1H), 7.70 (d, *J* = 7.7 Hz, 1H), 7.58 (s, 1H), 7.49 (d, *J* = 7.7 Hz, 1H),

7.20 (t, *J* = 7.7 Hz, 1H), 6.69 (d, *J* = 7.3 Hz, 1H). <sup>13</sup>C NMR (100 MHz, Methanol-D<sub>4</sub>) δ 138.5, 135.1, 133.6, 133.2, 129.2, 128.5, 127.6, 127.5, 124.0, 118.2, 112.6. HRMS GC/QTOF (*m/z*): calcd for C<sub>11</sub>H<sub>7</sub>BrN<sub>2</sub>O [*M*]: 261.9742, found: 261.9734.

### 7-Bromopyrazolo[5,1-*a*]isoquinolin-1-ol (**7h**)

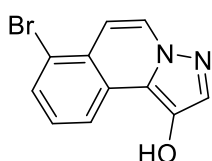

Flash column chromatography on silica gel (eluent: PE/EA = 2/1, v/v) to afford **7h**.

Yellow solid (47.8 mg, 61%), mp 281.1-290.0 °C. <sup>1</sup>H NMR (400 MHz, Acetone-D<sub>6</sub>) δ

8.52 (d, *J* = 8.0 Hz, 1H), 8.22 (d, *J* = 7.7 Hz, 1H), 7.77 (dd, *J* = 7.8, 0.9 Hz, 1H), 7.71 (s,



1H), 7.49 (t,  $J = 7.9$  Hz, 1H), 7.20 (d,  $J = 7.7$  Hz, 1H).  $^{13}\text{C}$  NMR (100 MHz, Acetone- $\text{D}_6$ )  $\delta$  138.2, 131.4, 131.0, 129.4, 129.27, 128.3, 127.9, 123.6, 123.1, 121.7, 110.0. HRMS GC/QTOF ( $m/z$ ): calcd for  $\text{C}_{11}\text{H}_7\text{BrN}_2\text{O}$  [M]: 261.9742, found: 261.9738.

#### 1-Fluoropyrazolo[5,1-*a*]isoquinoline (8a)

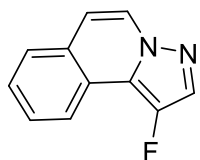

Flash column chromatography on silica gel (eluent: PE/EA = 2/1, v/v) to afford 8a.

Yellow solid (26.2 mg, 47%), mp 98.3-99.2 °C.  $^1\text{H}$  NMR (400 MHz,  $\text{CDCl}_3$ )  $\delta$  8.26 (d,  $J = 7.9$  Hz, 1H), 8.06 (d,  $J = 7.4$  Hz, 1H), 7.85 (d,  $J = 3.6$  Hz, 1H), 7.71 (d,  $J = 7.8$  Hz, 1H),

7.58 (dt,  $J = 23.5, 7.3$  Hz, 2H), 6.95 (d,  $J = 7.4$  Hz, 1H).  $^{13}\text{C}$  NMR (100 MHz,  $\text{CDCl}_3$ )  $\delta$  144.2 (d,  $J = 247.8$  Hz), 142.9, 128.4, 128.1, 127.9 (d,  $J = 12.9$  Hz), 127.1, 126.5, 123.8 (d,  $J = 6.1$  Hz), 123.7, 123.6, 112.5.  $^{19}\text{F}$  NMR (376 MHz,  $\text{CDCl}_3$ )  $\delta$  -176.52. HRMS GC/QTOF ( $m/z$ ): calcd for  $\text{C}_{11}\text{H}_7\text{FN}_2$  [M]: 186.0593, found: 186.0586.

#### 1-Bromopyrazolo[5,1-*a*]isoquinoline (8b)

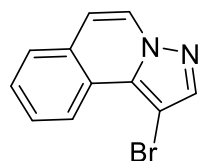

Flash column chromatography on silica gel (eluent: PE/EA = 2/1, v/v) to afford 8b.

Yellow solid (62.5 mg, 85%), mp 140.5-141.4 °C.  $^1\text{H}$  NMR (400 MHz,  $\text{CDCl}_3$ )  $\delta$  8.91 (d, 1H), 8.11 (d,  $J = 7.4$  Hz, 1H), 7.90 (s, 1H), 7.65 – 7.61 (m, 1H), 7.58 – 7.47 (m, 2H),

6.91 (d,  $J = 7.4$  Hz, 1H).  $^{13}\text{C}$  NMR (100 MHz,  $\text{CDCl}_3$ )  $\delta$  142.4, 133.3, 129.2, 128.3, 127.6, 127.1, 126.5, 124.4, 123.2, 112.9, 86.5. HRMS GC/QTOF ( $m/z$ ): calcd for  $\text{C}_{11}\text{H}_7\text{BrN}_2$  [M]: 245.9793, found: 245.9787.

#### 1-Iodopyrazolo[5,1-*a*]isoquinoline (8c)

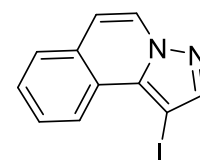

Flash column chromatography on silica gel (eluent: PE/EA = 2/1, v/v) to afford 8c.

Yellow solid (76.5 mg, 87%), mp 133.4-134.1 °C.  $^1\text{H}$  NMR (400 MHz,  $\text{CDCl}_3$ )  $\delta$  9.14 (d,  $J = 8.0$  Hz, 1H), 8.15 (t,  $J = 8.2$  Hz, 1H), 7.94 (s, 1H), 7.63 (t,  $J = 8.4$  Hz, 1H), 7.55 (dt,

$J = 14.2, 6.9$  Hz, 2H), 6.94 (d,  $J = 7.4$  Hz, 1H).  $^{13}\text{C}$  NMR (100 MHz,  $\text{CDCl}_3$ )  $\delta$  147.5, 134.8, 129.3, 128.4, 127.3, 127.2, 126.5, 124.7, 123.0, 113.0, 48.5. HRMS GC/QTOF ( $m/z$ ): calcd for  $\text{C}_{11}\text{H}_7\text{IN}_2$  [M]: 293.9654, found: 293.9651.

#### Pyrazolo[5,1-*a*]isoquinoline-1-carbaldehyde (8d)

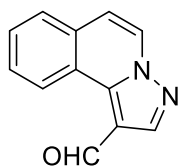

Flash column chromatography on silica gel (eluent: PE/EA = 2/1, v/v) to afford **8d**. Yellow solid (42.9 mg, 73%), mp 183.1-183.9 °C. <sup>1</sup>H NMR (400 MHz, CDCl<sub>3</sub>) δ 10.15 (s, 1H), 9.72 – 9.60 (m, 1H), 8.45 (s, 1H), 8.33 (d, *J* = 7.3 Hz, 1H), 7.79 (dd, *J* = 13.0, 9.8 Hz, 1H), 7.76 – 7.64 (m, 2H), 7.29 (d, *J* = 7.8 Hz, 1H). <sup>13</sup>C NMR (100 MHz, CDCl<sub>3</sub>) δ 183.2, 148.6, 137.9, 130.9, 130.4, 128.5, 128.0, 127.1, 126.2, 124.4, 117.5, 115.8. HRMS GC/QTOF (*m/z*): calcd for C<sub>12</sub>H<sub>8</sub>N<sub>2</sub>O [M]: 196.0637, found: 196.0634.

#### Pyrazolo[5,1-*a*]isoquinolin-1-yl 3-phenoxypropanoate (**8e**)

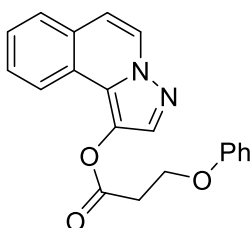

Flash column chromatography on silica gel (eluent: PE/EA = 2/1, v/v) to afford **8e**. Yellow solid (66.7 mg, 69%), mp 190.7-191.5 °C. <sup>1</sup>H NMR (400 MHz, CDCl<sub>3</sub>) δ 8.28 (d, *J* = 8.0 Hz, 1H), 8.16 (s, 1H), 8.11 (d, *J* = 7.4 Hz, 1H), 7.69 (d, *J* = 7.9 Hz, 1H), 7.50 (t, *J* = 7.4 Hz, 1H), 7.38 (t, *J* = 7.5 Hz, 1H), 7.32 (t, *J* = 7.9 Hz, 2H), 6.98 (dt, *J* = 10.2, 7.5 Hz, 4H), 4.48 (t, *J* = 6.1 Hz, 2H), 3.23 (t, *J* = 6.1 Hz, 2H). <sup>13</sup>C NMR (100 MHz, CDCl<sub>3</sub>) δ 168.5, 158.5, 133.4, 129.7, 129.2, 128.9, 128.1, 127.9, 127.2, 127.0, 126.5, 124.1, 123.7, 121.5, 114.7, 112.6, 63.3, 35.1. HRMS GC/QTOF (*m/z*): calcd for C<sub>20</sub>H<sub>16</sub>N<sub>2</sub>O<sub>3</sub> [M]: 332.1161, found: 332.1154.

#### Pyrazolo[5,1-*a*]isoquinolin-1-yl furan-2-carboxylate (**8f**)

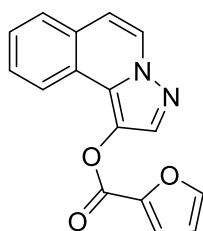

Flash column chromatography on silica gel (eluent: PE/EA = 2/1, v/v) to afford **8f**. Yellow solid (70.1 mg, 84%), mp 182.5-183.4 °C. <sup>1</sup>H NMR (400 MHz, CDCl<sub>3</sub>) δ 8.33 (s, 1H), 8.21 (d, *J* = 4.9 Hz, 2H), 8.09 (d, *J* = 7.4 Hz, 1H), 7.70 – 7.63 (m, 1H), 7.57 (s, 1H), 7.55 – 7.47 (m, 2H), 6.97 (d, *J* = 1.0 Hz, 1H), 6.91 (d, *J* = 7.4 Hz, 1H). <sup>13</sup>C NMR (100 MHz, CDCl<sub>3</sub>) δ 160.3, 148.9, 144.5, 133.5, 128.9, 127.9, 127.7, 127.3, 127.2, 127.0, 126.4, 123.9, 123.3, 118.5, 112.4, 110.1. HRMS GC/QTOF (*m/z*): calcd for C<sub>16</sub>H<sub>10</sub>N<sub>2</sub>O<sub>3</sub> [M]: 278.0691, found: 278.0686.

### 3. NMR spectra for new compounds

$^1\text{H}$  NMR (400 MHz,  $\text{CDCl}_3$ ) spectrum of compound **3a**

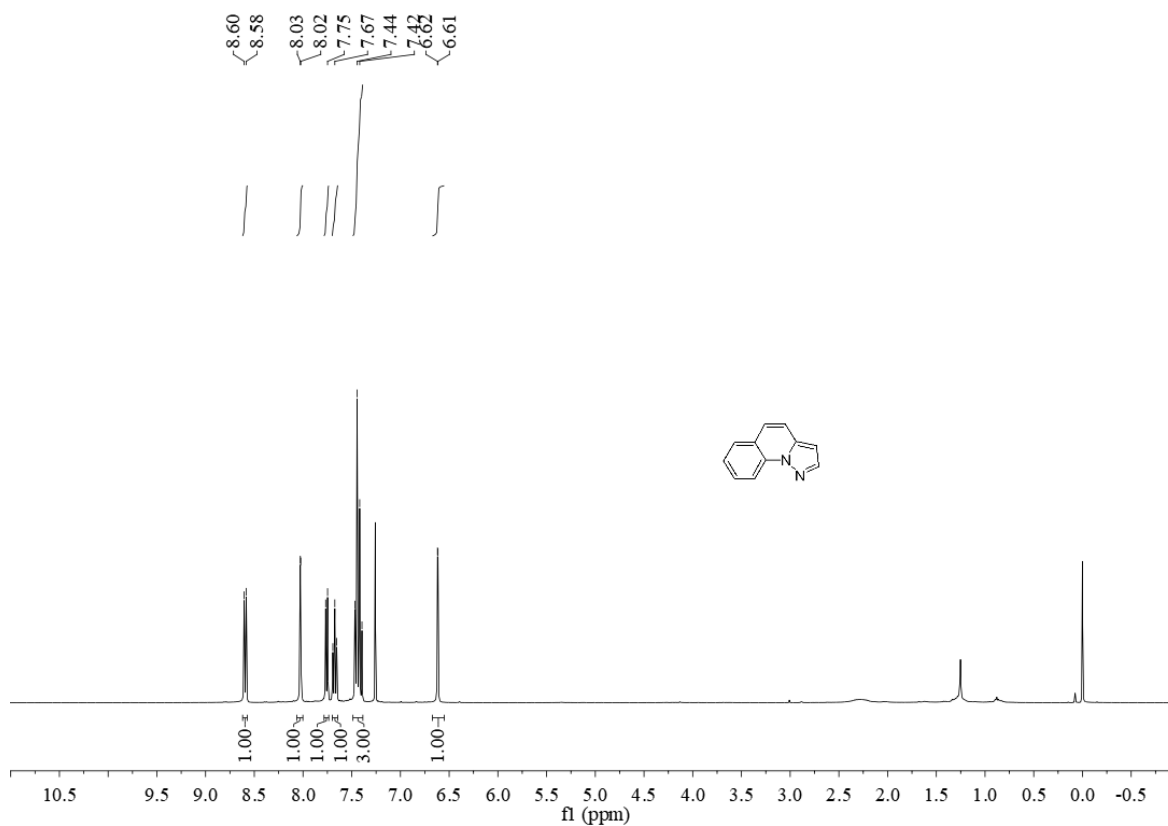

$^{13}\text{C}$  NMR (100 MHz,  $\text{CDCl}_3$ ) spectrum of compound **3a**

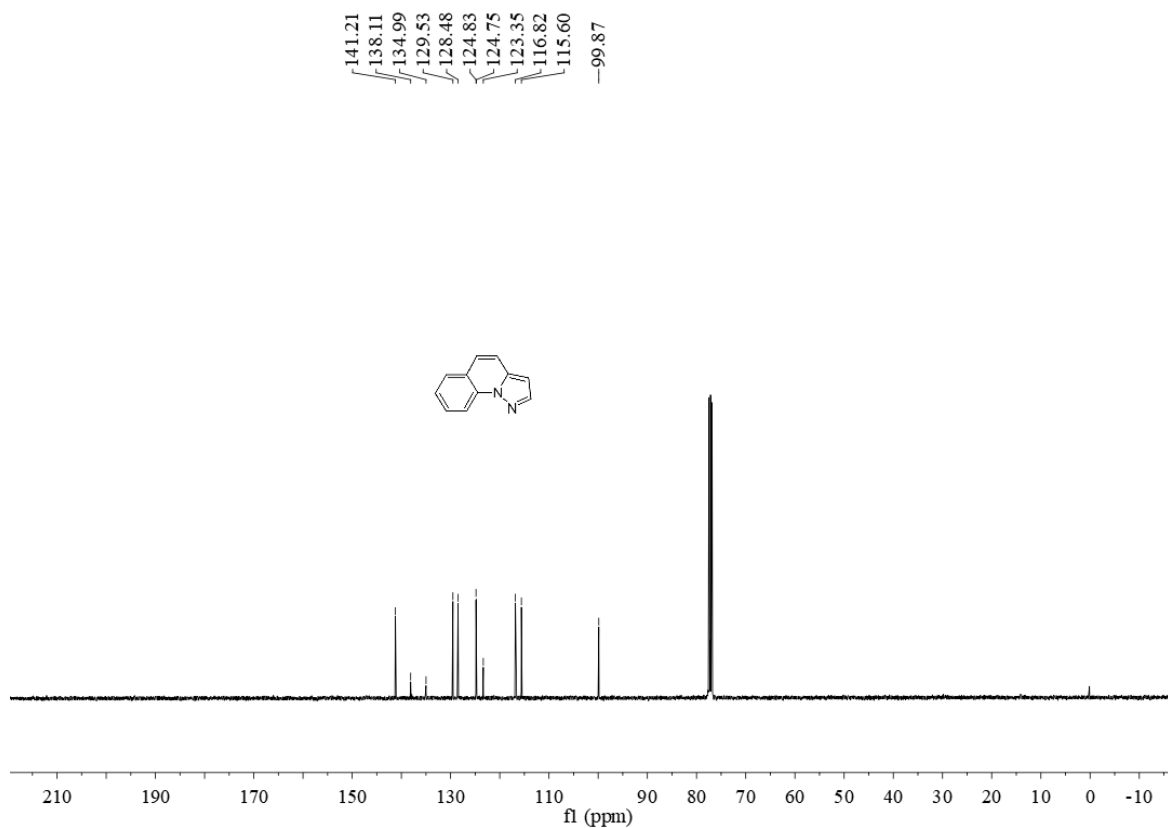

<sup>1</sup>H NMR (400 MHz, CDCl<sub>3</sub>) spectrum of compound **3b**

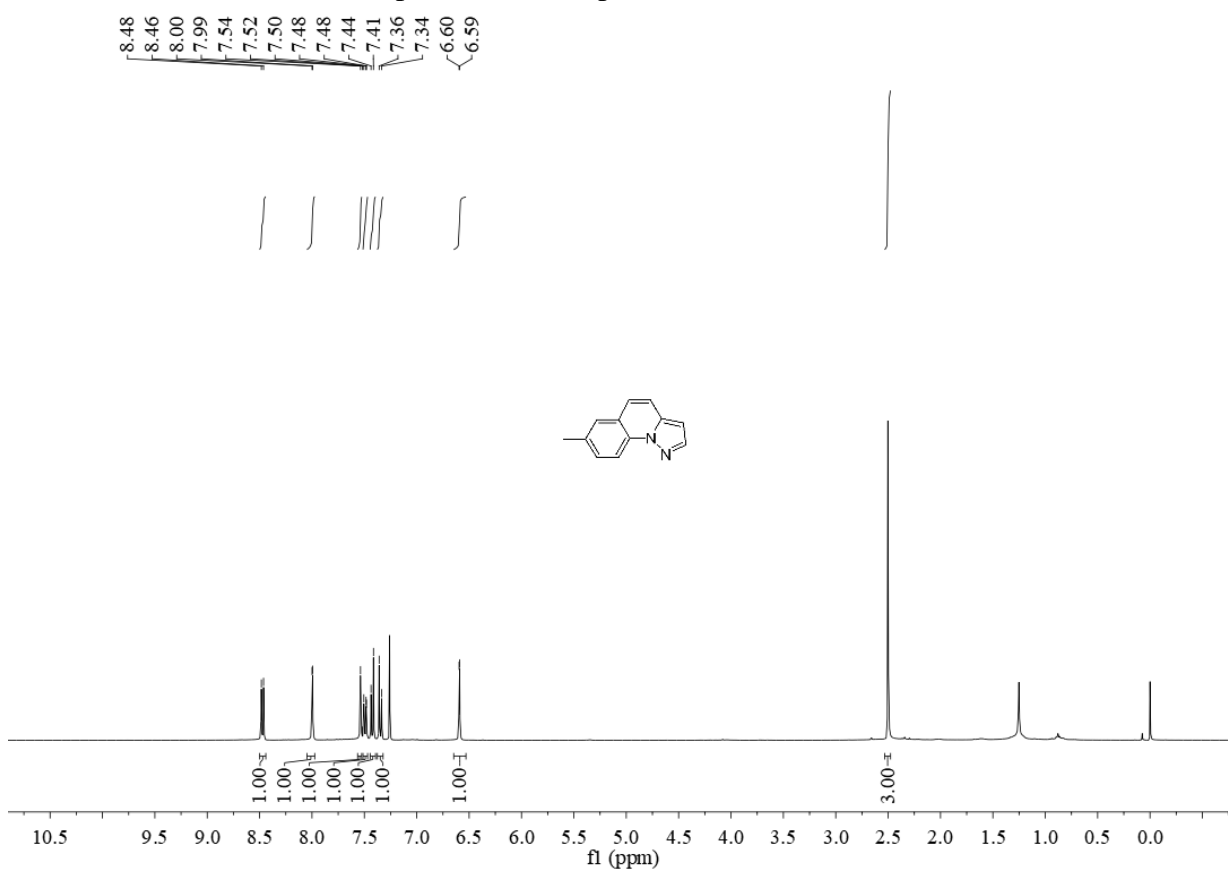

<sup>13</sup>C NMR (100 MHz, CDCl<sub>3</sub>) spectrum of compound **3b**

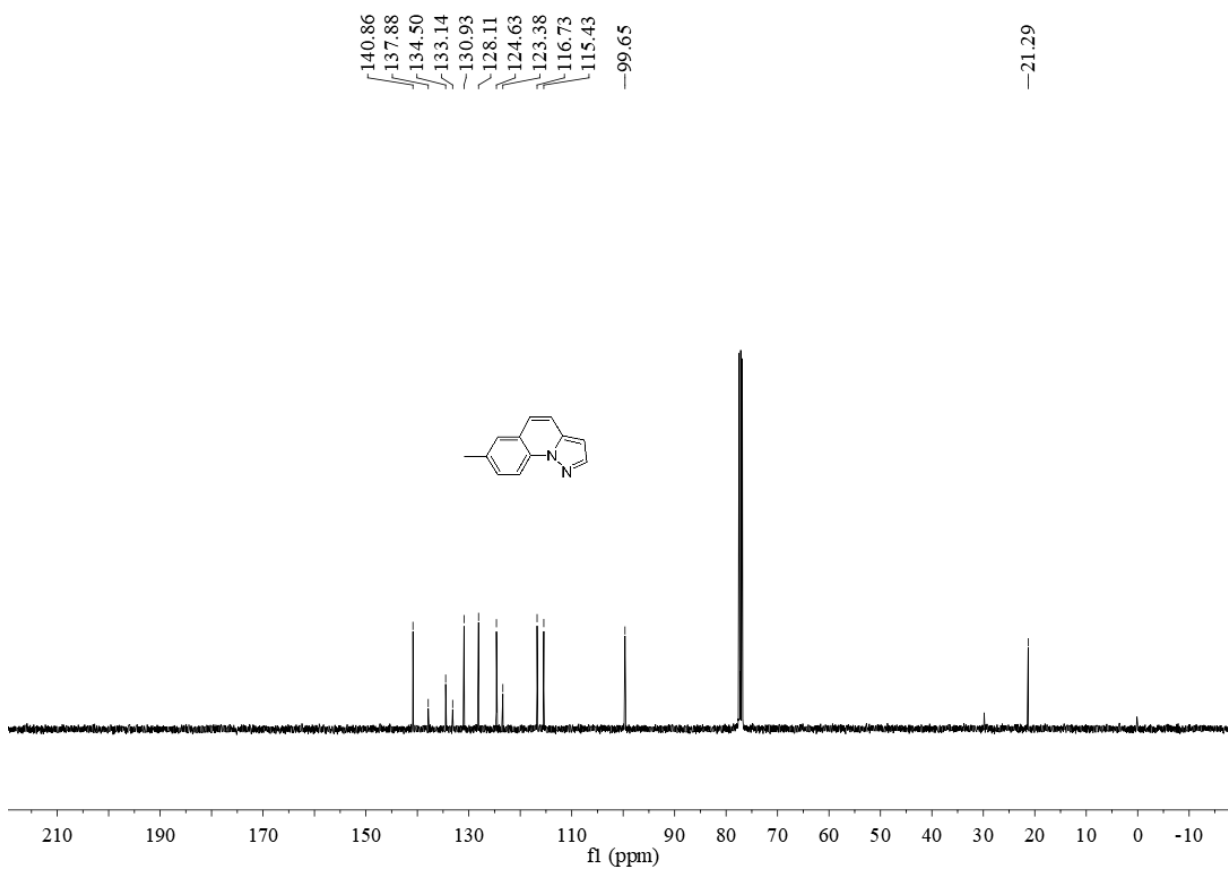

$^1\text{H}$  NMR (400 MHz,  $\text{CDCl}_3$ ) spectrum of compound **3c**

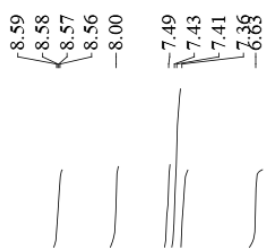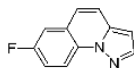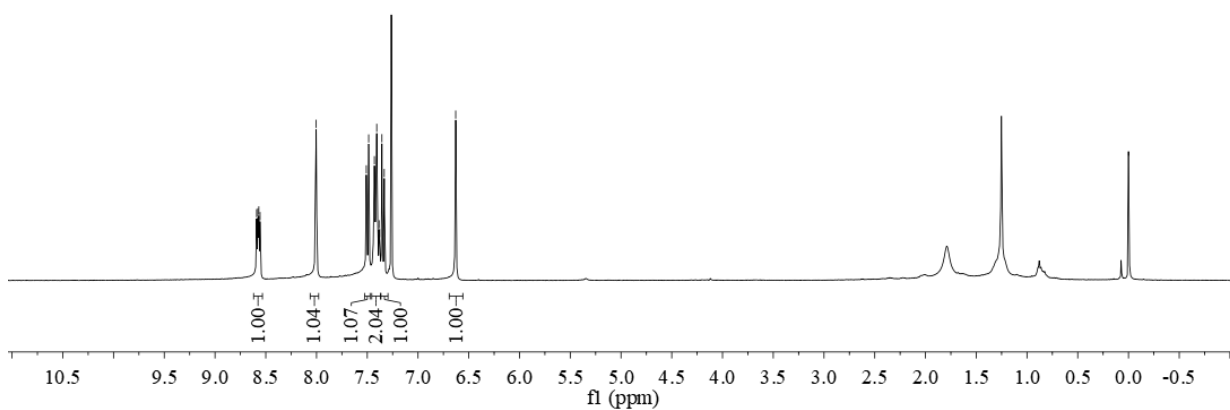

$^{13}\text{C}$  NMR (100 MHz,  $\text{CDCl}_3$ ) spectrum of compound **3c**

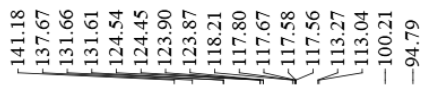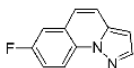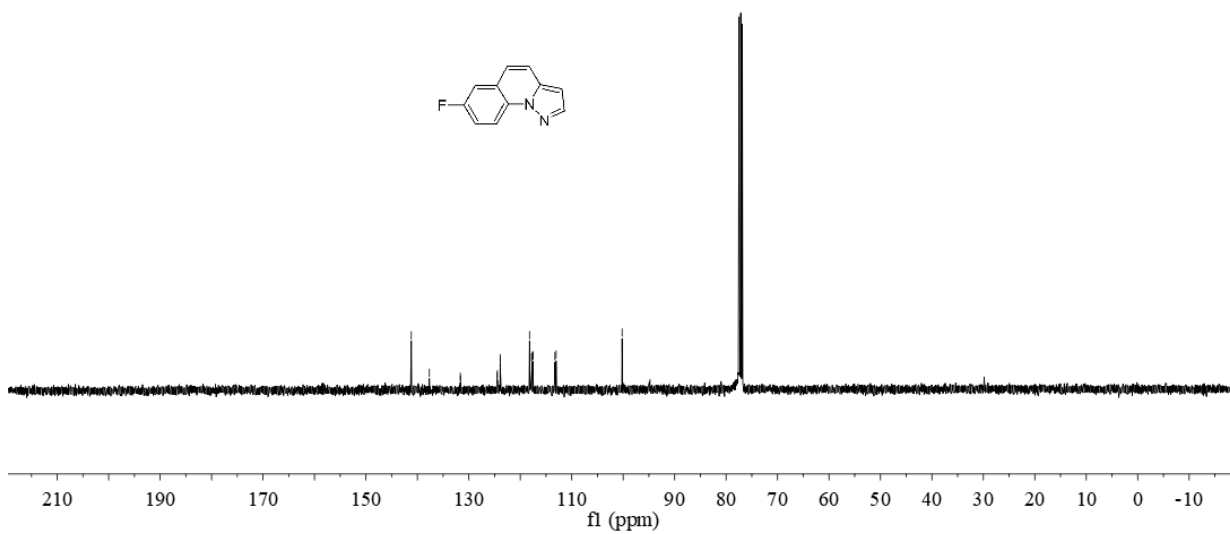

$^{19}\text{F}$  NMR (376 MHz,  $\text{CDCl}_3$ ) spectrum of compound **3c**

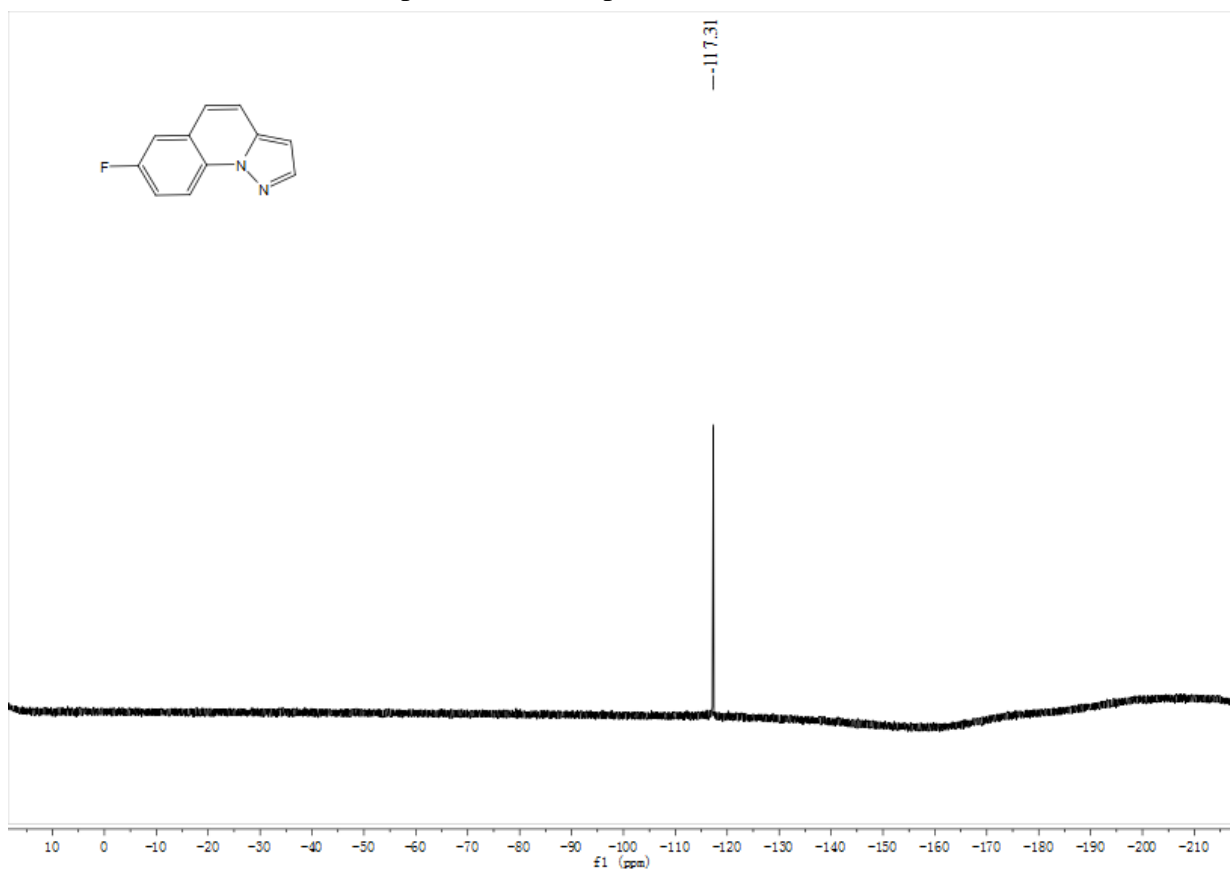

$^1\text{H}$  NMR (400 MHz,  $\text{CDCl}_3$ ) spectrum of compound **3d**

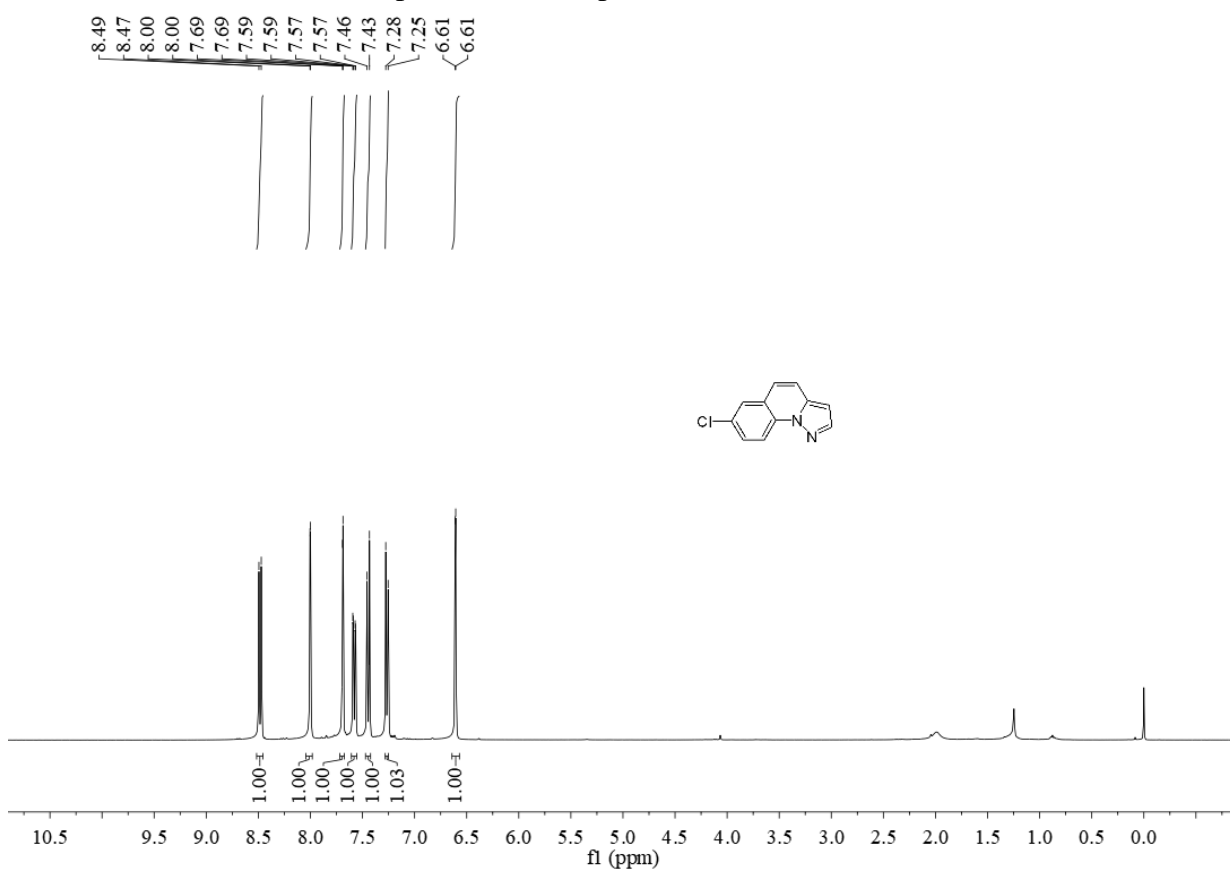

$^{13}\text{C}$  NMR (100 MHz,  $\text{CDCl}_3$ ) spectrum of compound **3d**

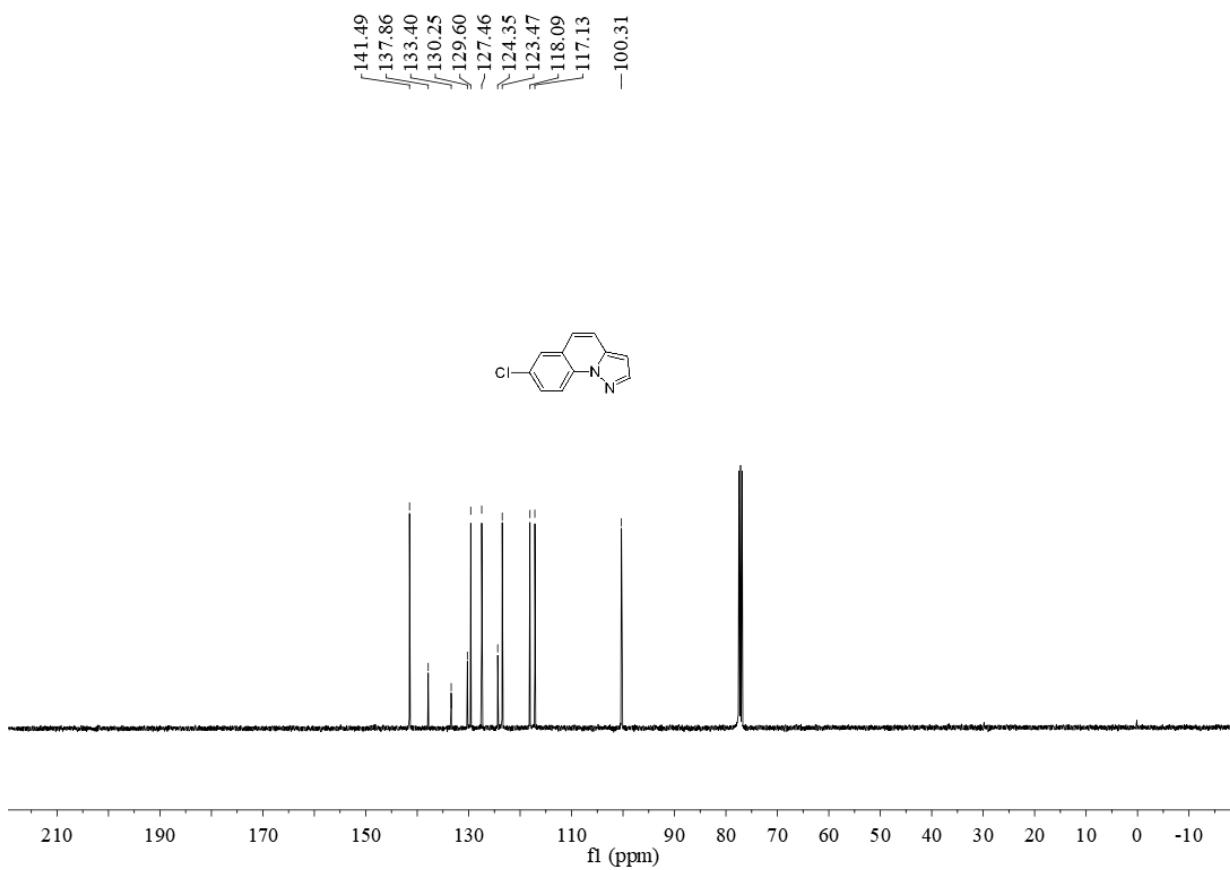

$^1\text{H}$  NMR (400 MHz,  $\text{CDCl}_3$ ) spectrum of compound **3e**

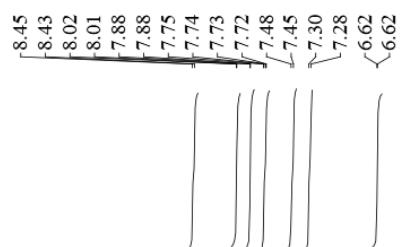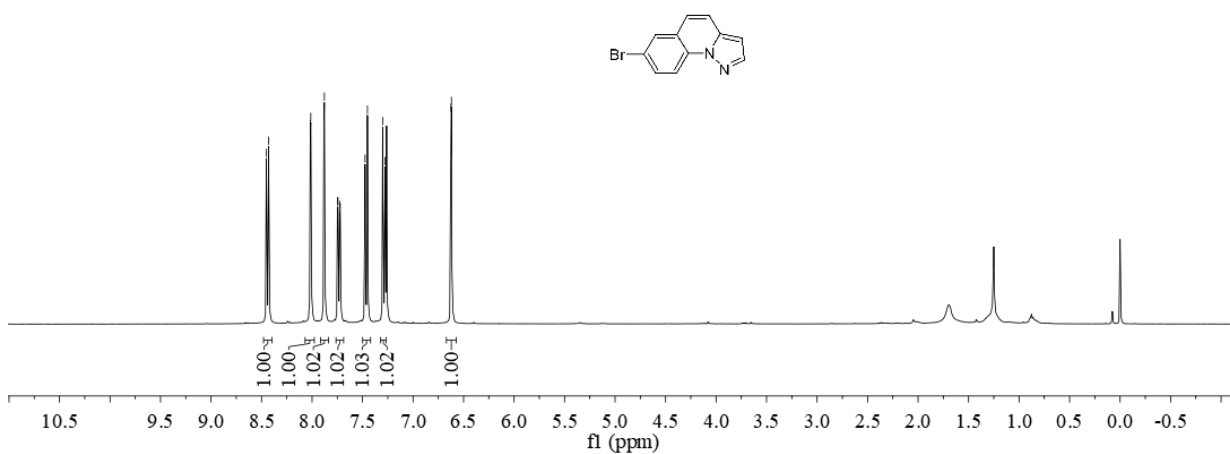

$^{13}\text{C}$  NMR (100 MHz,  $\text{CDCl}_3$ ) spectrum of compound **3e**

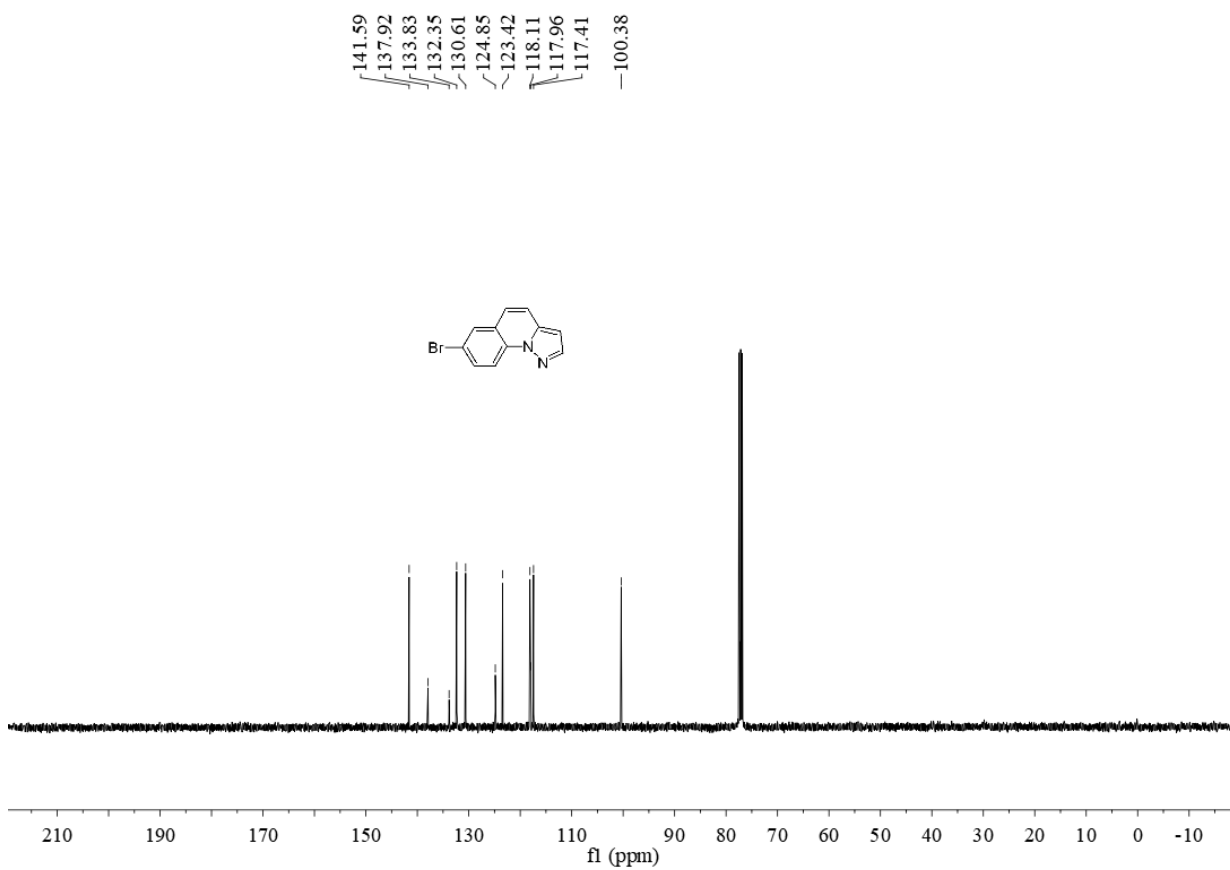



$^1\text{H}$  NMR (400 MHz,  $\text{CDCl}_3$ ) spectrum of compound **3f**

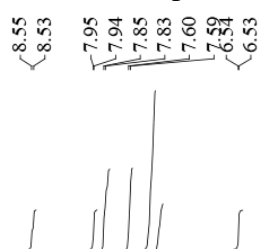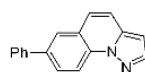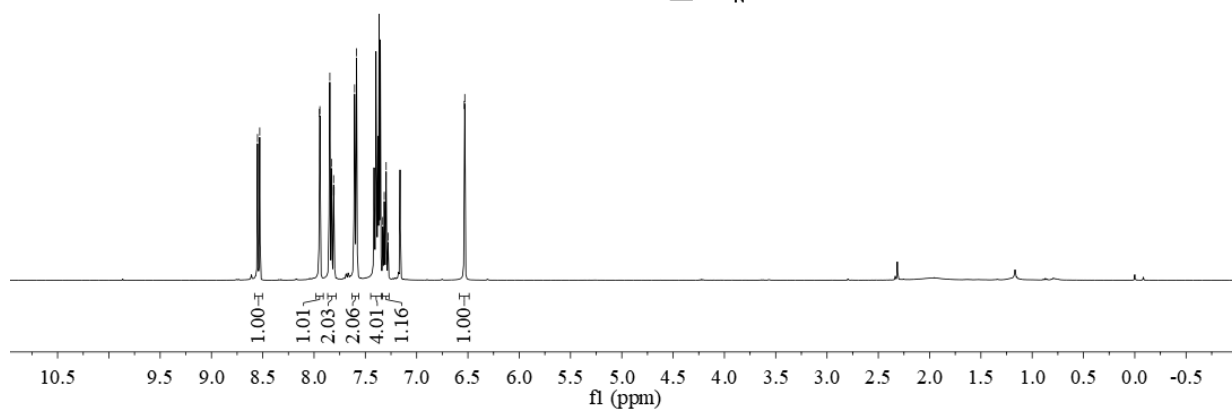

$^{13}\text{C}$  NMR (100 MHz,  $\text{CDCl}_3$ ) spectrum of compound **3f**

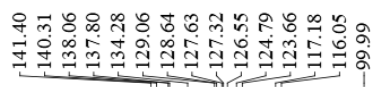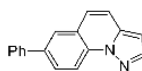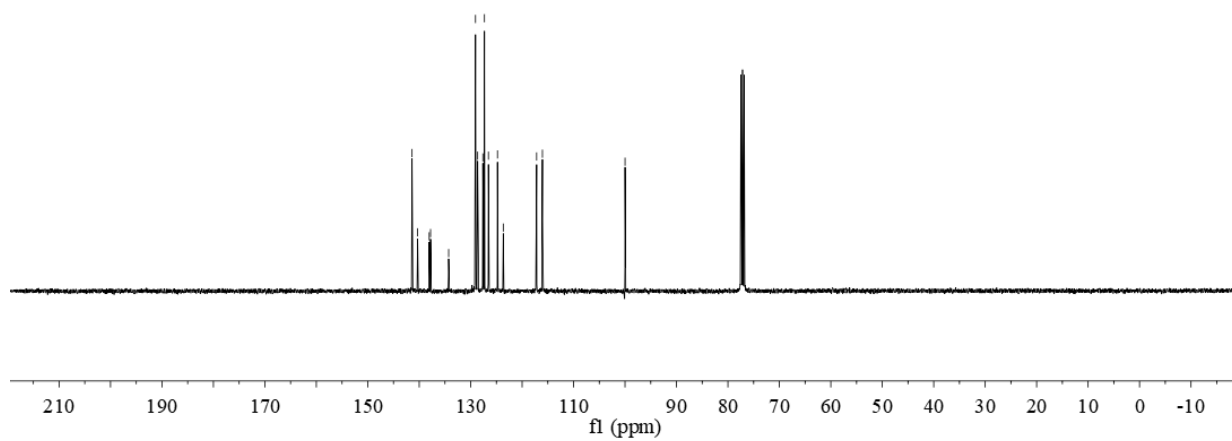

<sup>1</sup>H NMR (400 MHz, CDCl<sub>3</sub>) spectrum of compound **3g**

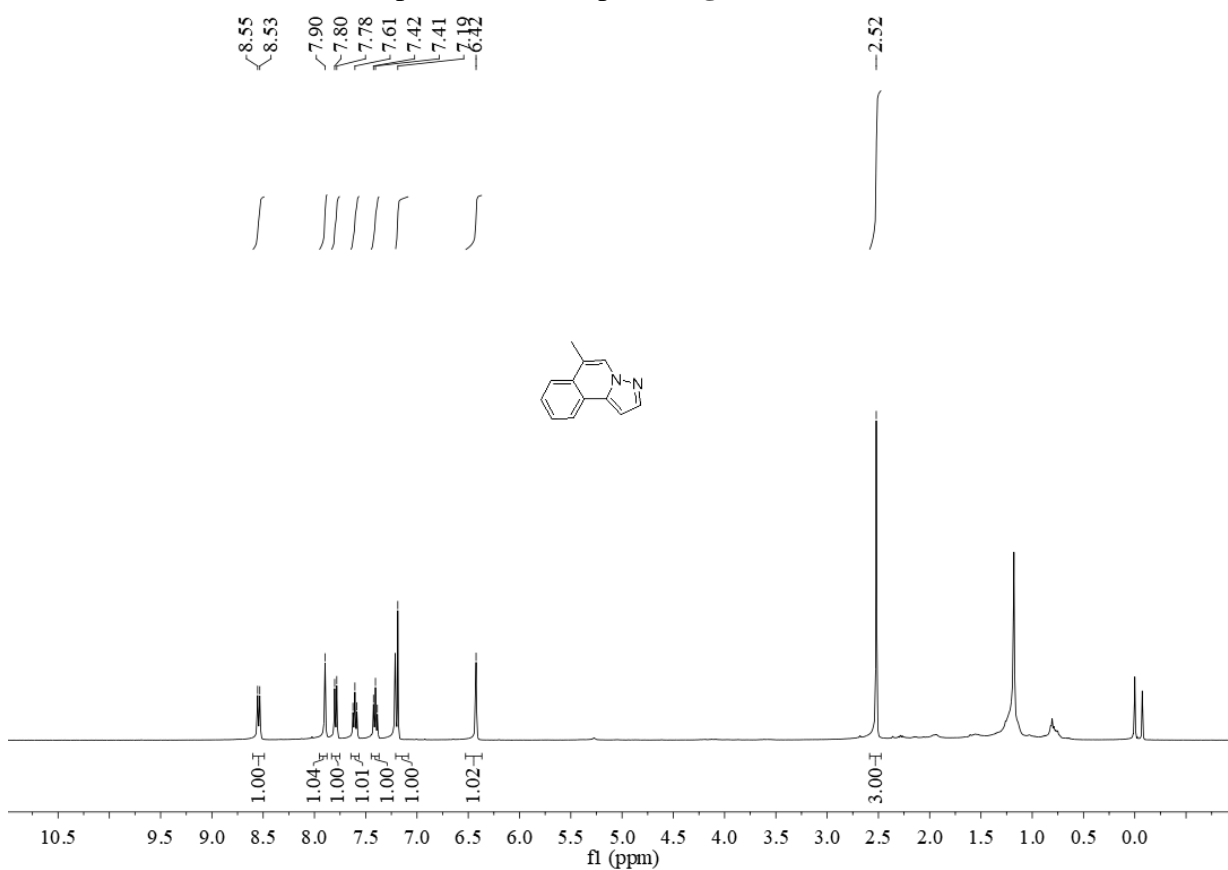

<sup>13</sup>C NMR (100 MHz, CDCl<sub>3</sub>) spectrum of compound **3g**

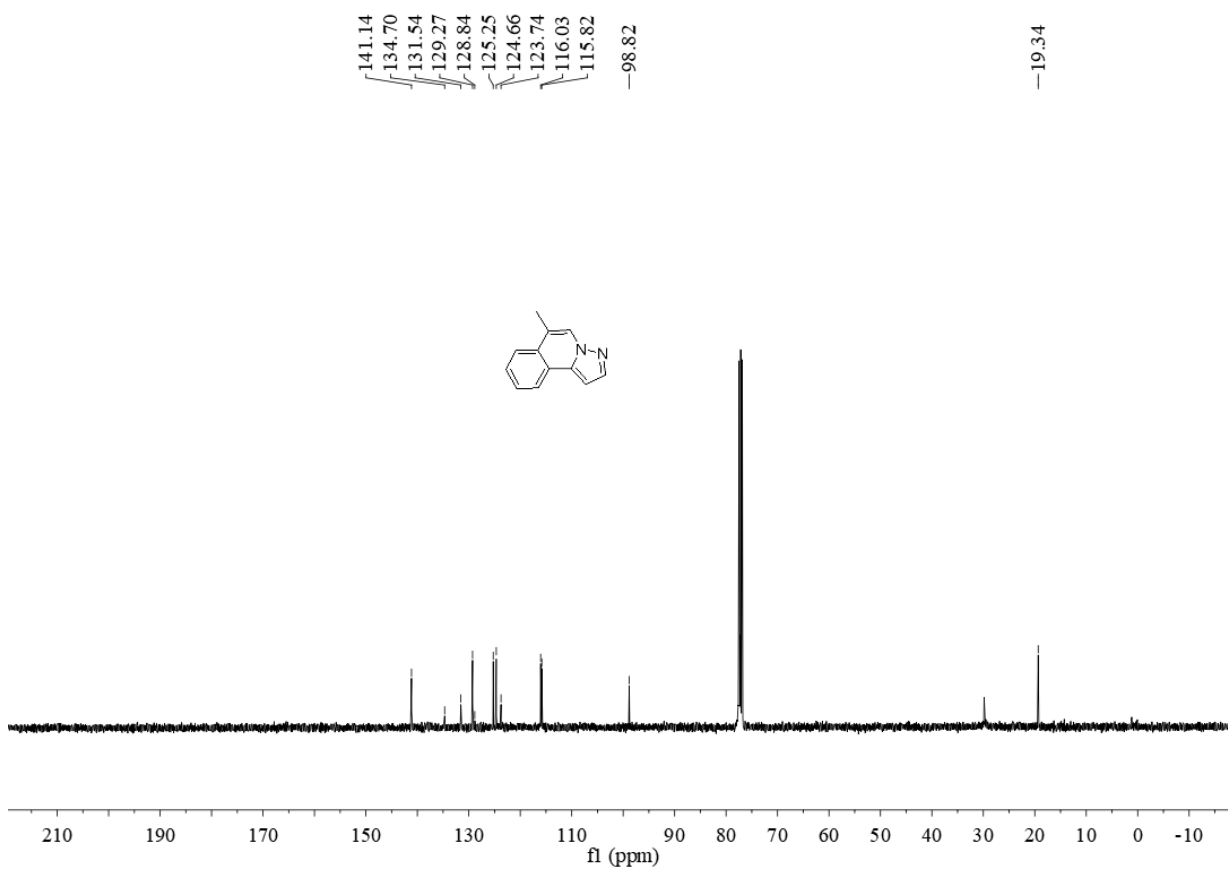

$^1\text{H}$  NMR (400 MHz,  $\text{CDCl}_3$ ) spectrum of compound **3h**

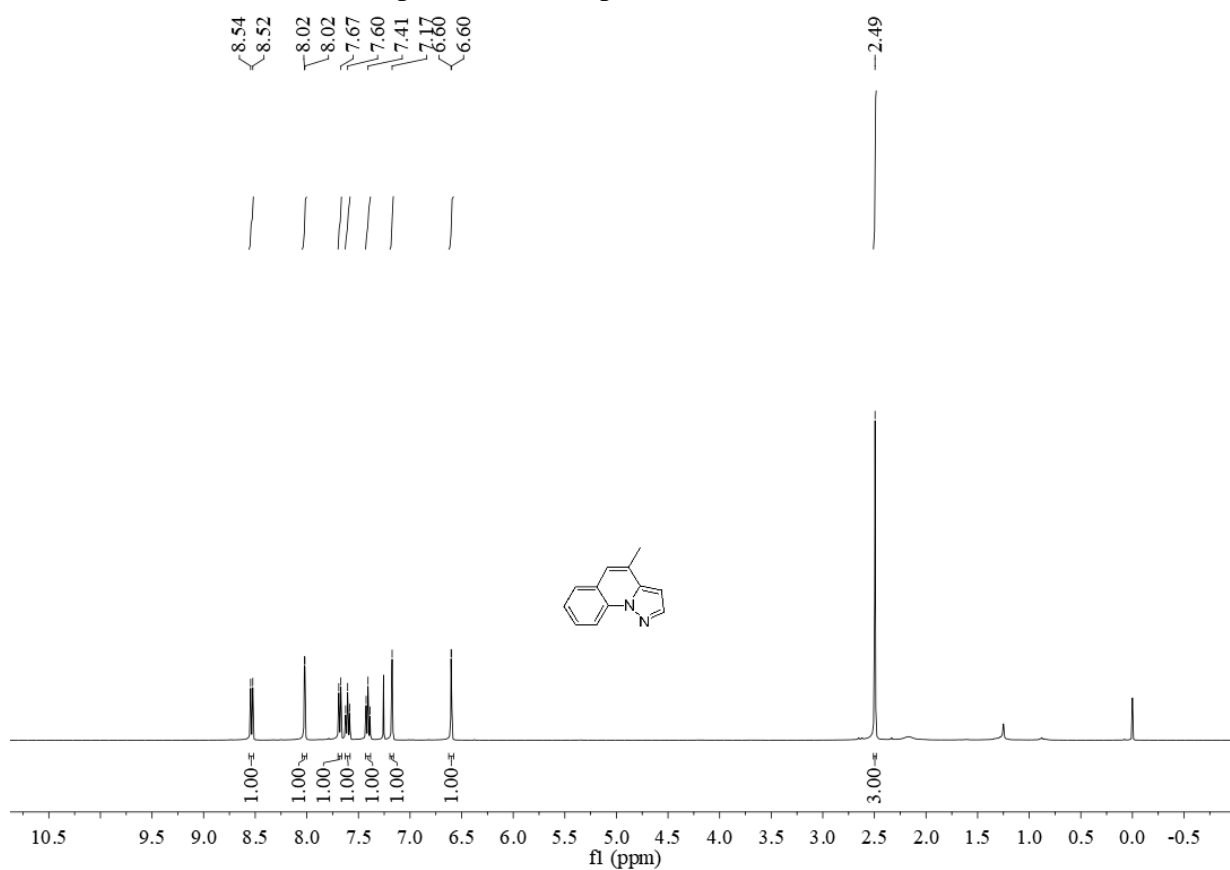

$^{13}\text{C}$  NMR (100 MHz,  $\text{CDCl}_3$ ) spectrum of compound **3h**

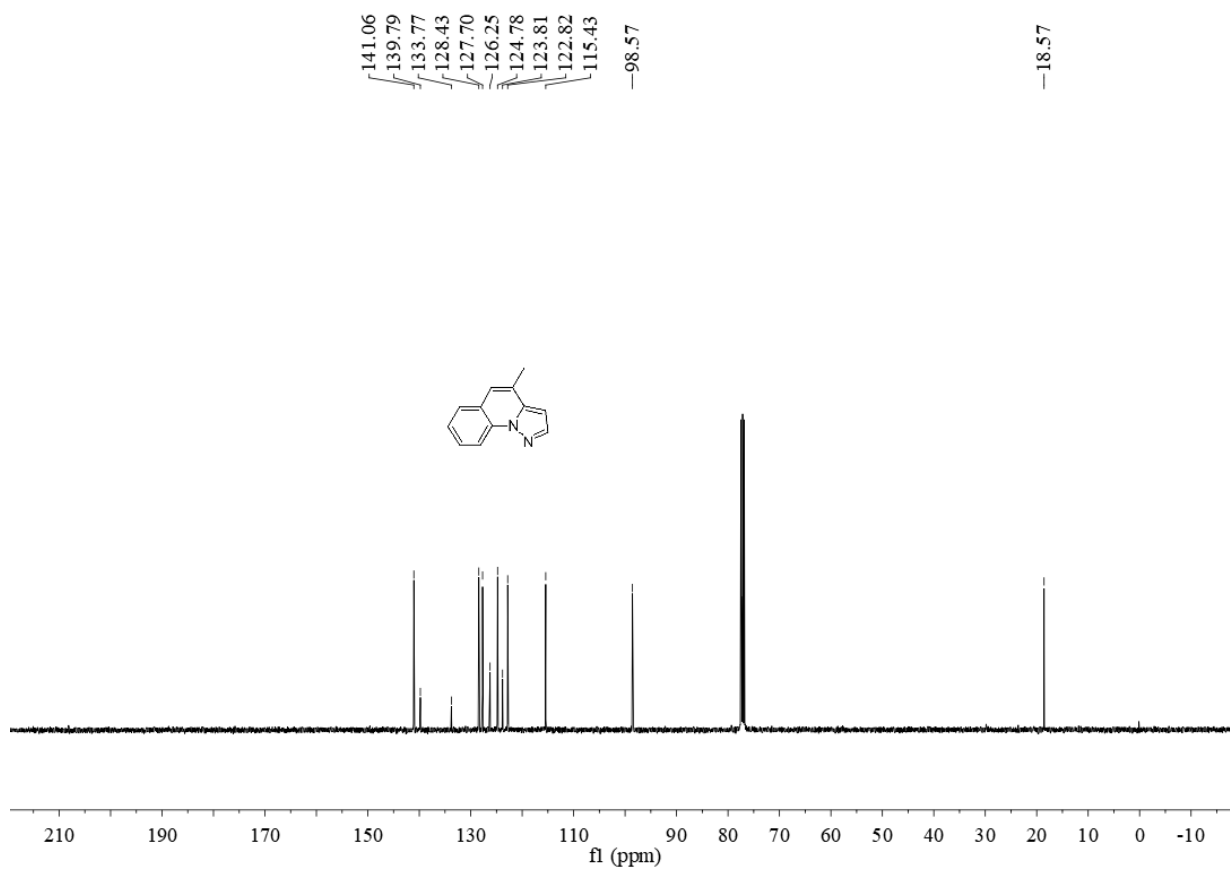

$^1\text{H}$  NMR (400 MHz,  $\text{CDCl}_3$ ) spectrum of compound **3i**

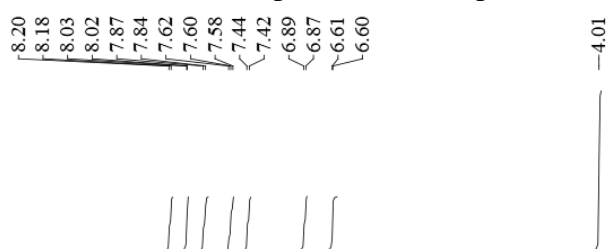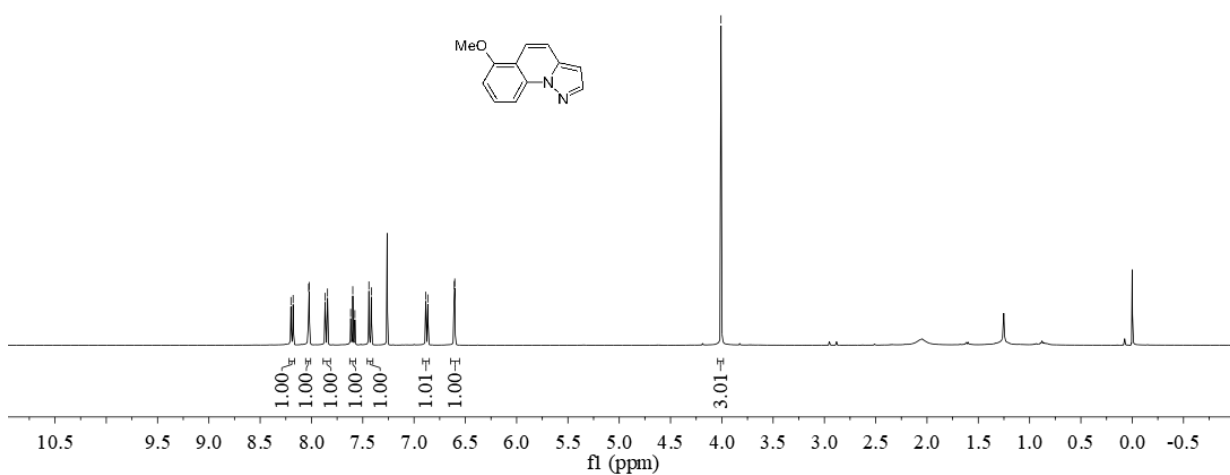

$^{13}\text{C}$  NMR (100 MHz,  $\text{CDCl}_3$ ) spectrum of compound **3i**

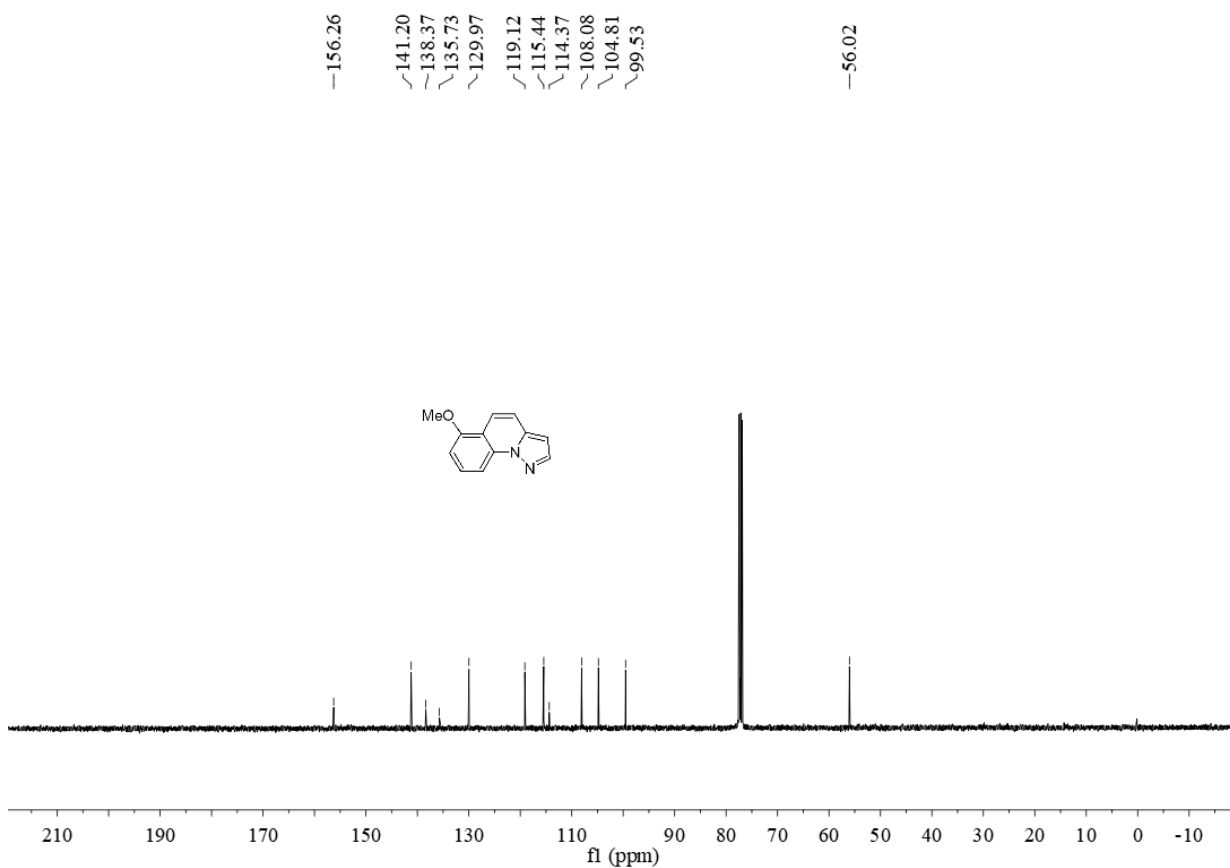

$^1\text{H}$  NMR (400 MHz,  $\text{CDCl}_3$ ) spectrum of compound **3j**

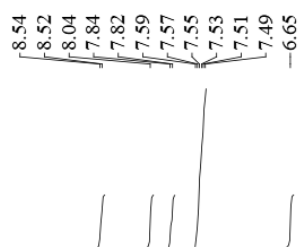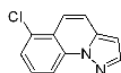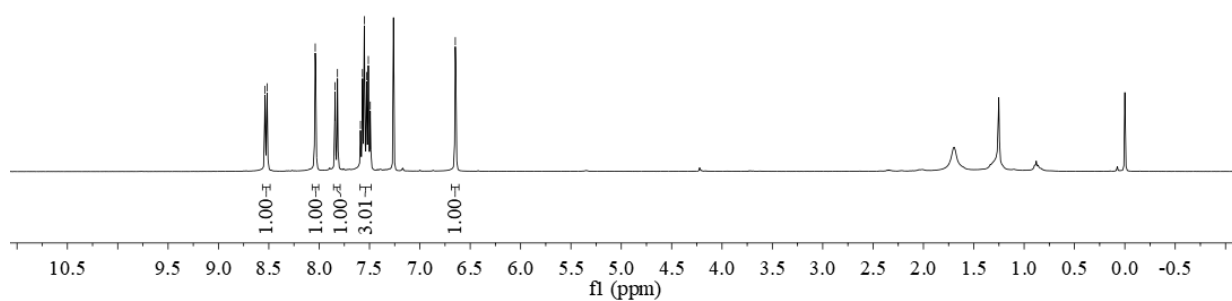

$^{13}\text{C}$  NMR (100 MHz,  $\text{CDCl}_3$ ) spectrum of compound **3j**

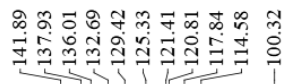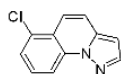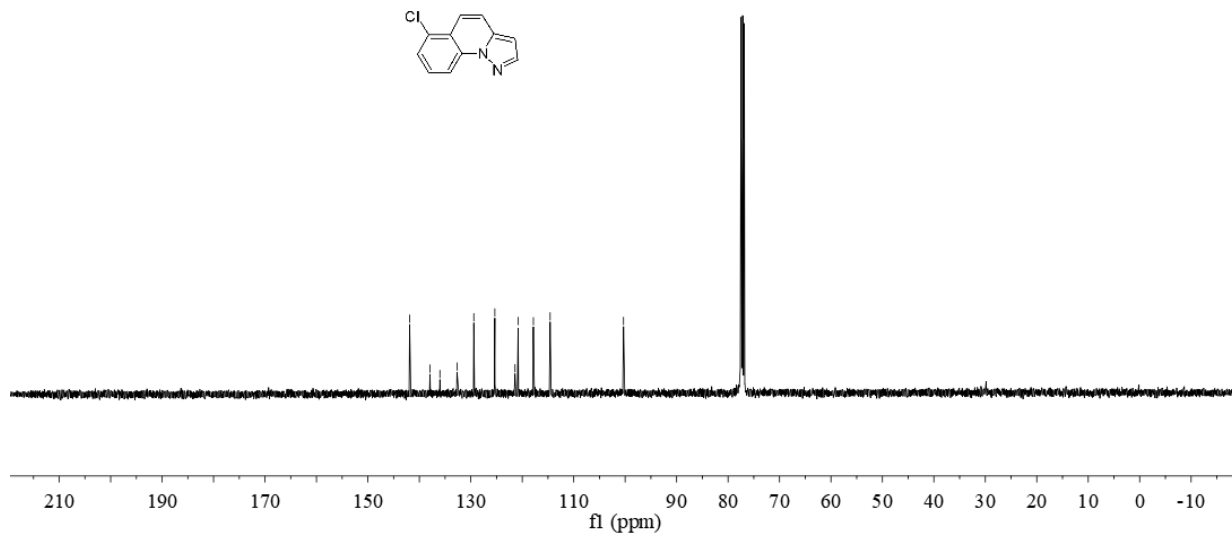

$^1\text{H}$  NMR (400 MHz,  $\text{CDCl}_3$ ) spectrum of compound **3k**

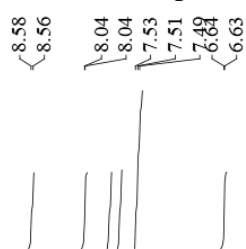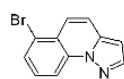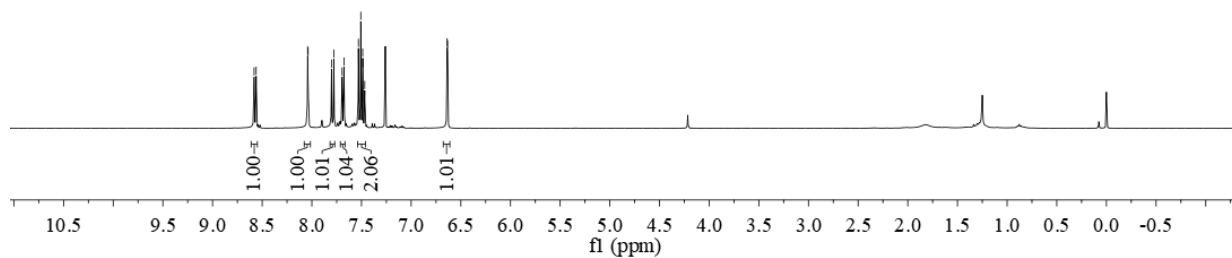

$^{13}\text{C}$  NMR (100 MHz,  $\text{CDCl}_3$ ) spectrum of compound **3k**

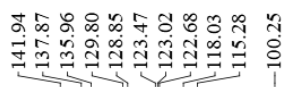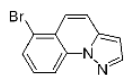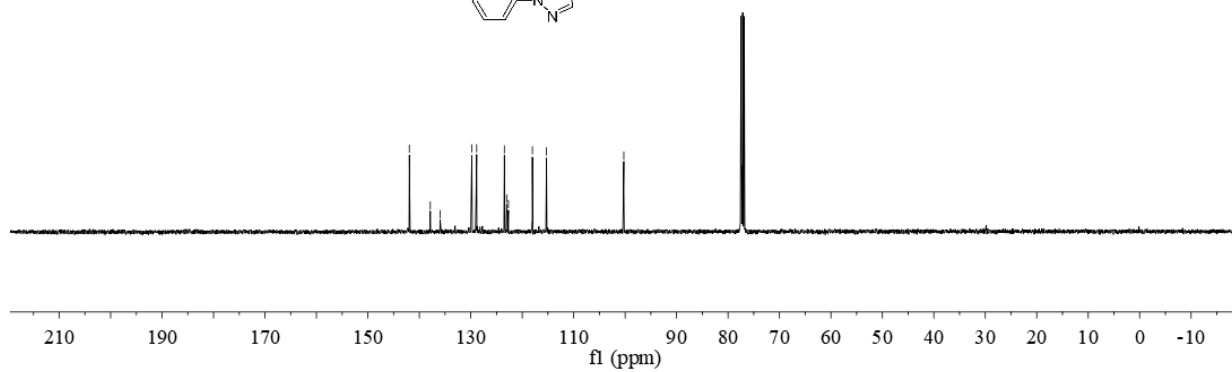

<sup>1</sup>H NMR (400 MHz, CDCl<sub>3</sub>) spectrum of compound **31**

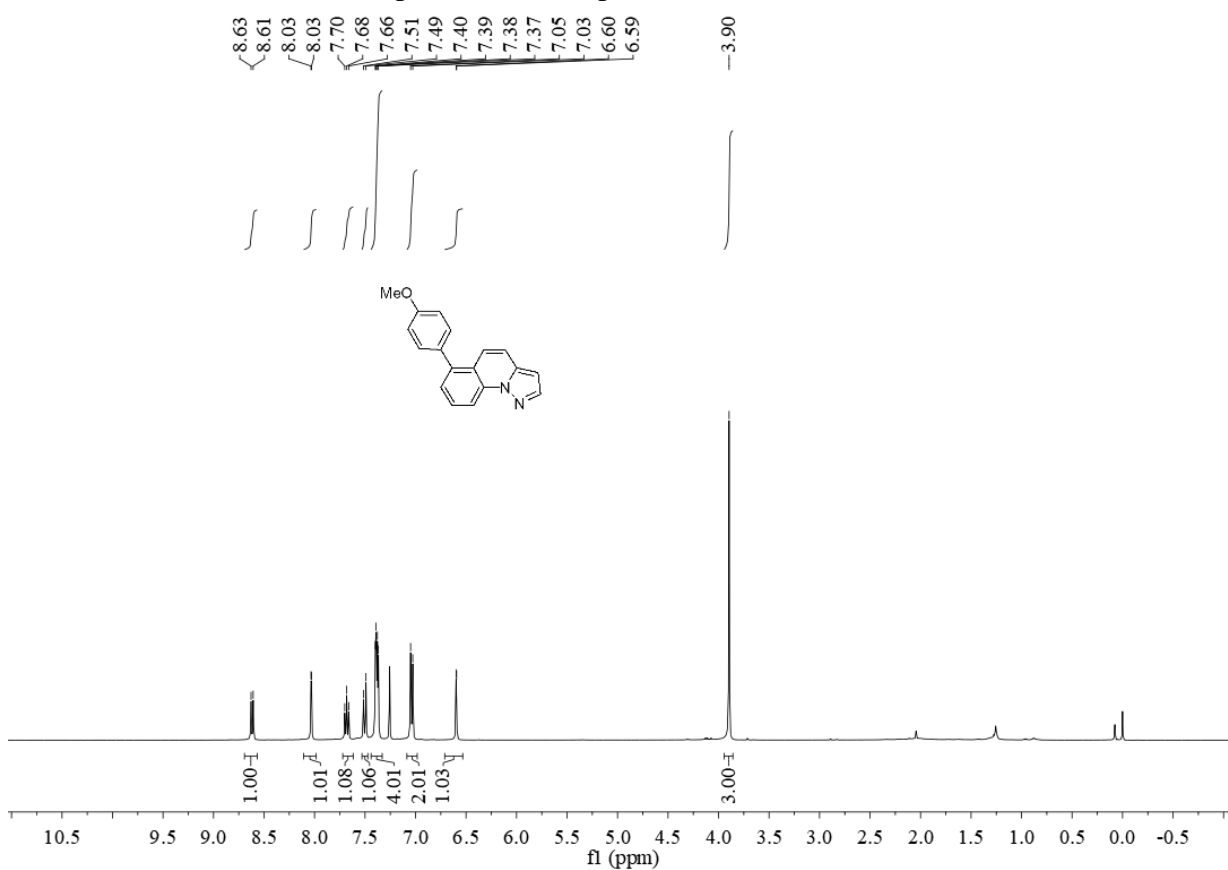

<sup>13</sup>C NMR (100 MHz, CDCl<sub>3</sub>) spectrum of compound **31**

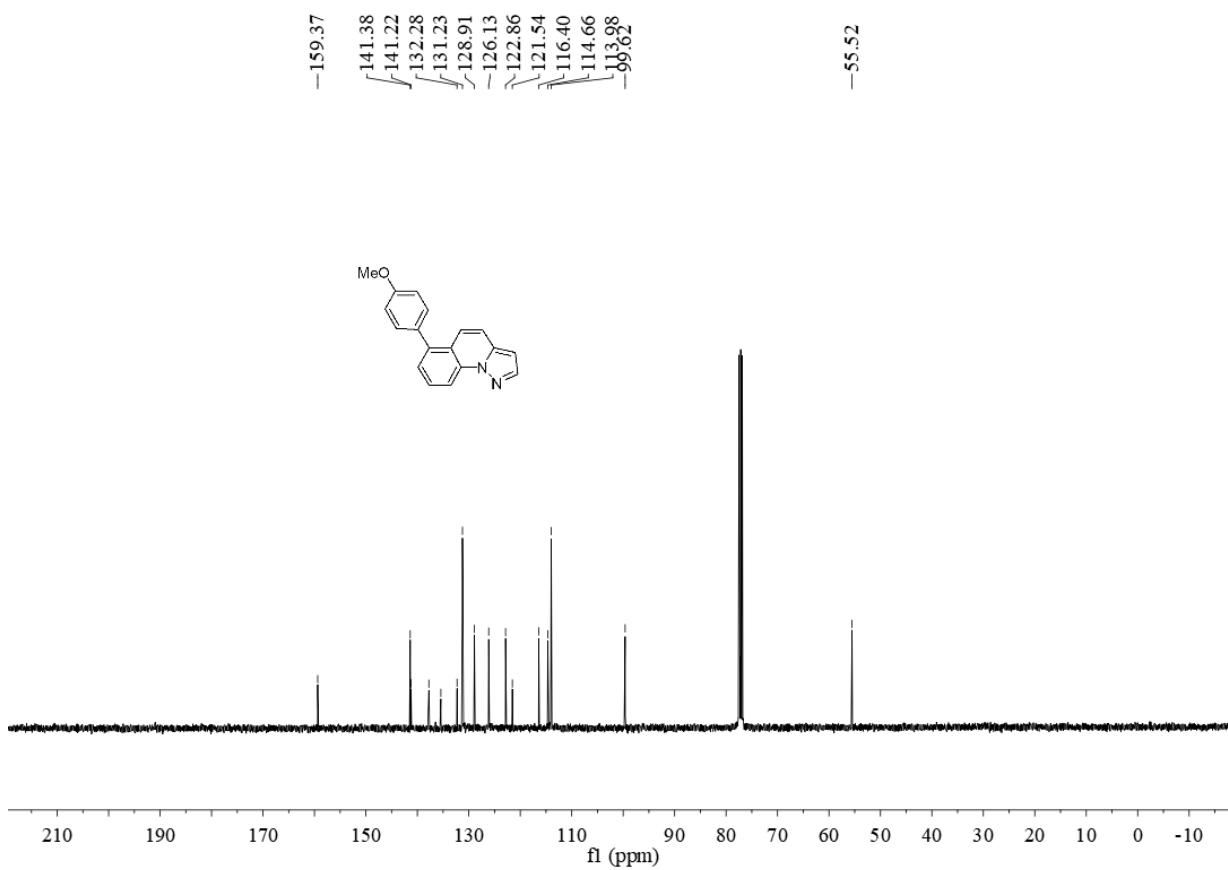

<sup>1</sup>H NMR (400 MHz, CDCl<sub>3</sub>) spectrum of compound **3m**

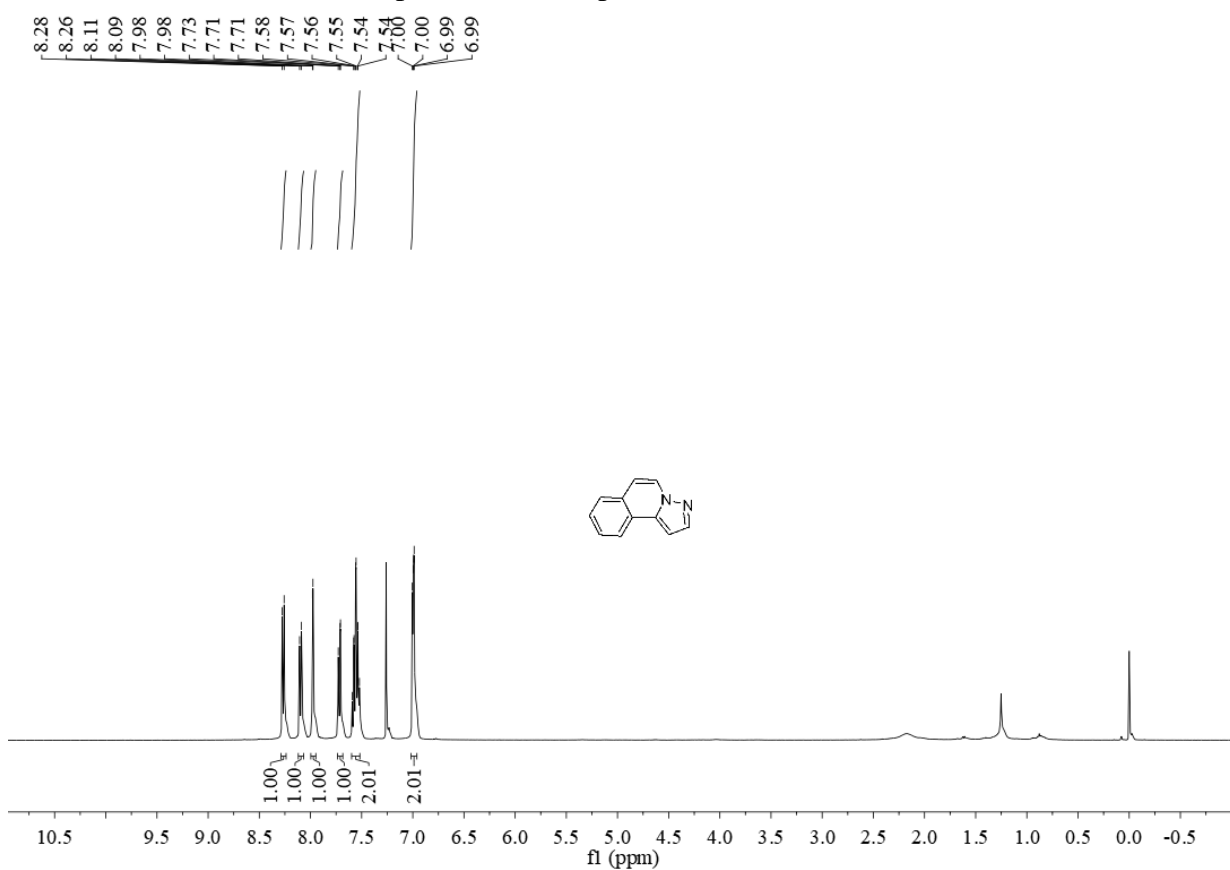

<sup>13</sup>C NMR (100 MHz, CDCl<sub>3</sub>) spectrum of compound **3m**

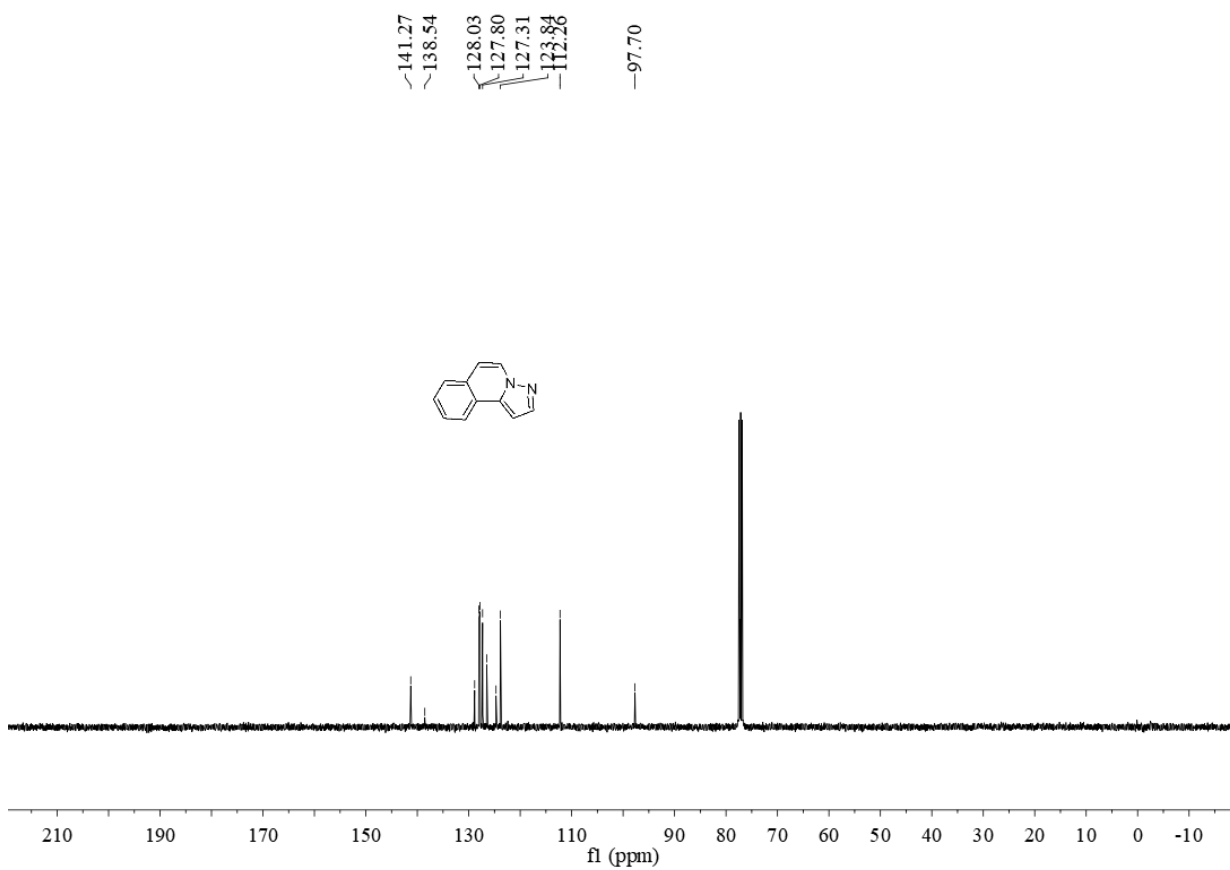



$^1\text{H}$  NMR (400 MHz,  $\text{CDCl}_3$ ) spectrum of compound **3n**

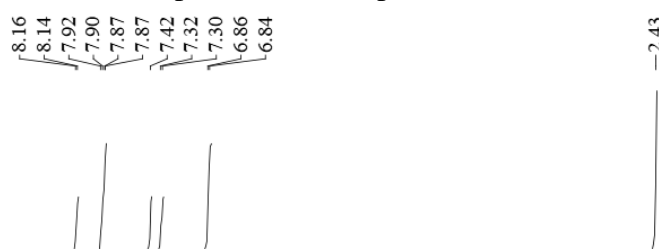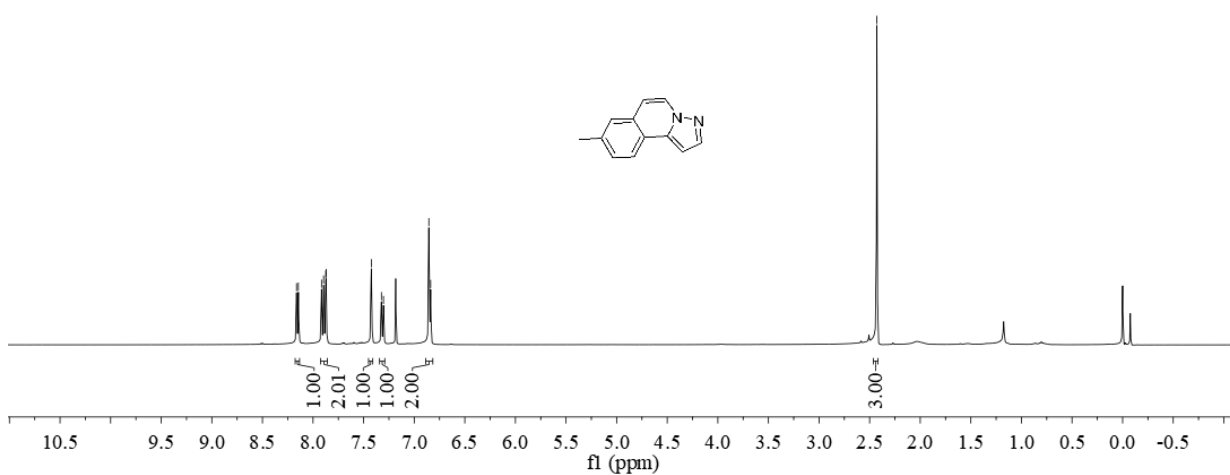

$^{13}\text{C}$  NMR (100 MHz,  $\text{CDCl}_3$ ) spectrum of compound **3n**

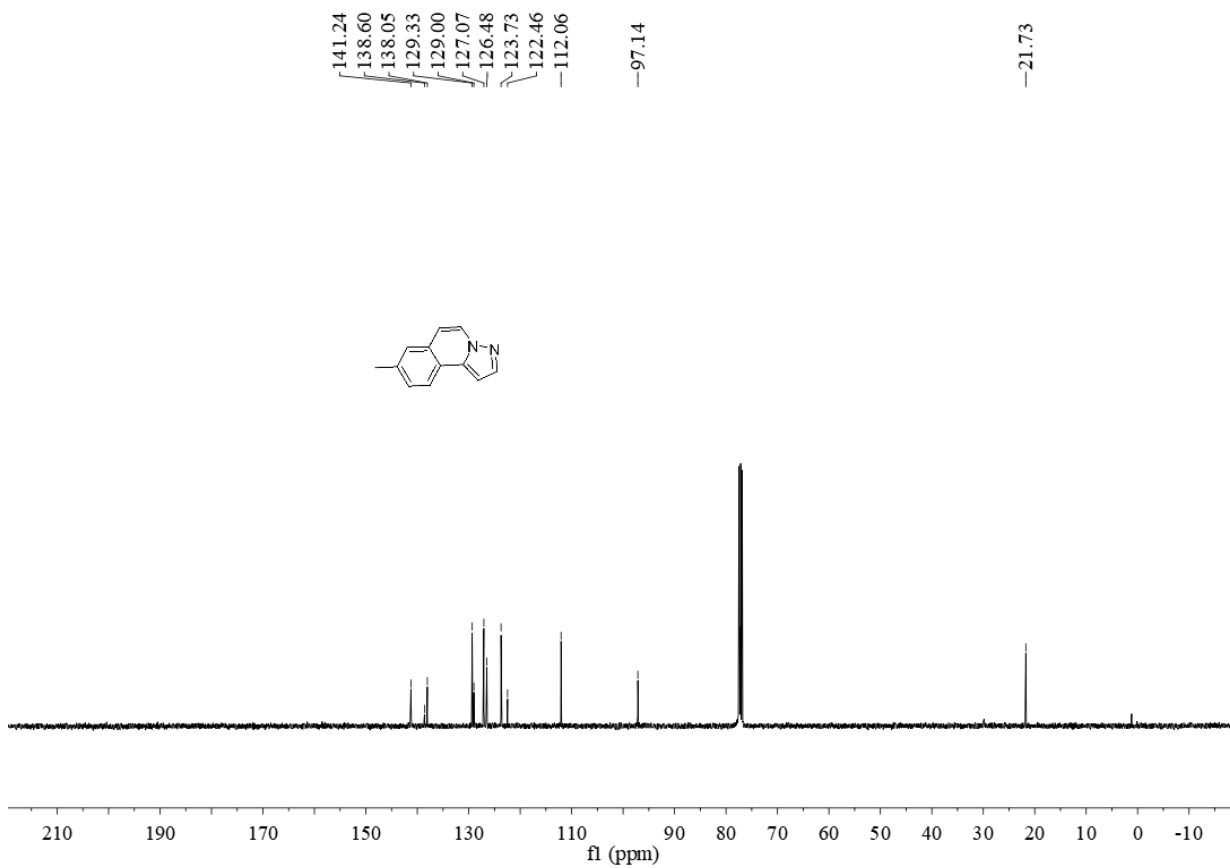

$^1\text{H}$  NMR (400 MHz,  $\text{CDCl}_3$ ) spectrum of compound **3o**

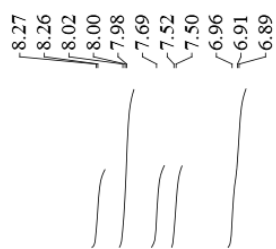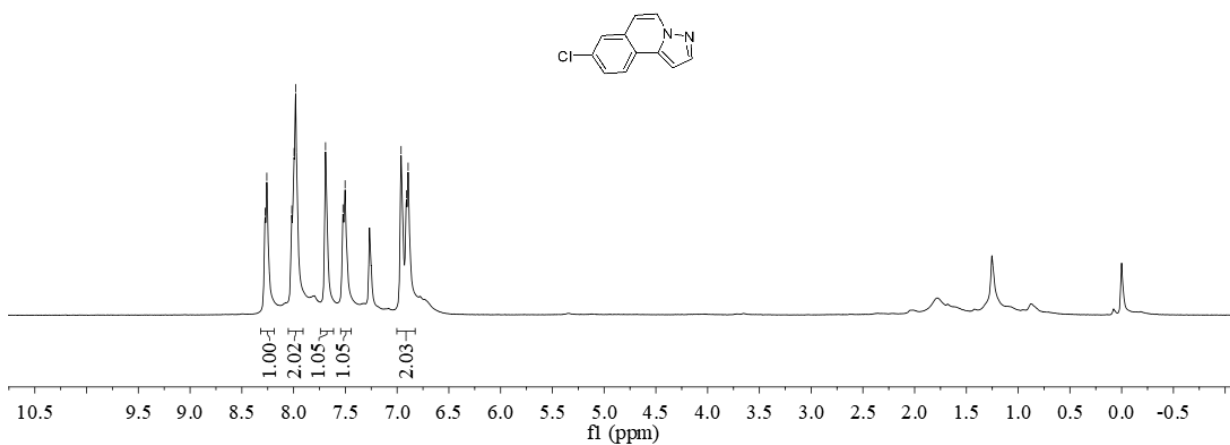

$^{13}\text{C}$  NMR (100 MHz,  $\text{CDCl}_3$ ) spectrum of compound **3o**

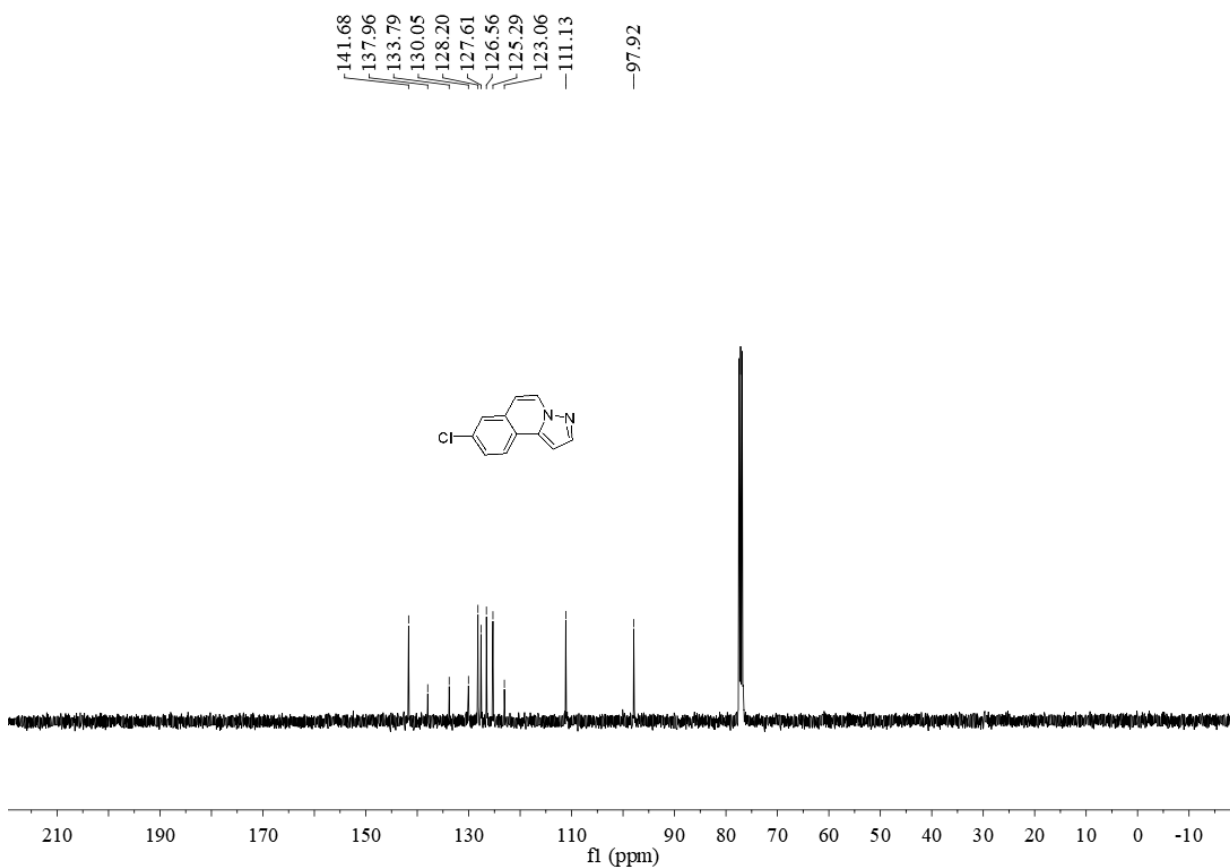

$^1\text{H}$  NMR (400 MHz,  $\text{CDCl}_3$ ) spectrum of compound **3p**

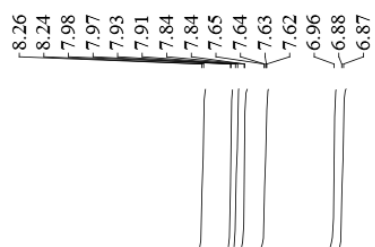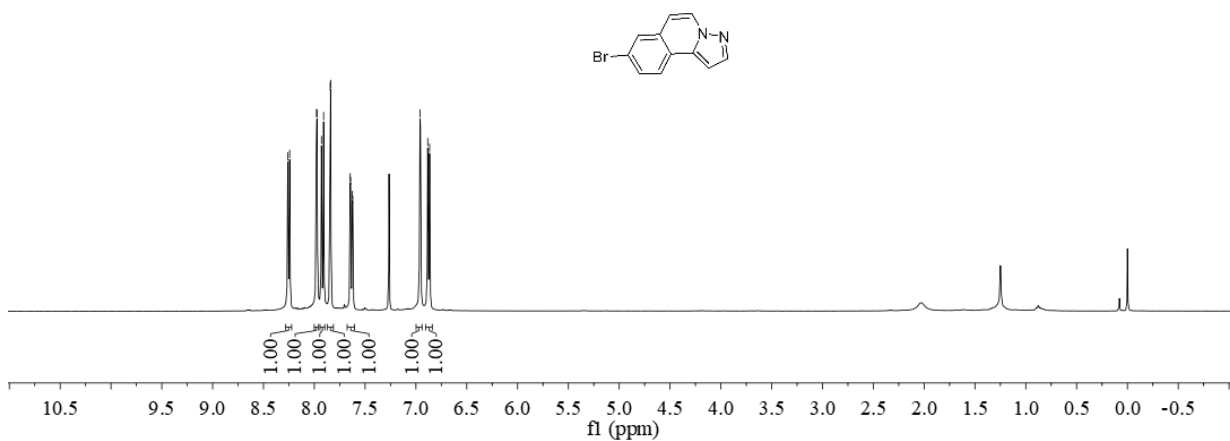

$^{13}\text{C}$  NMR (100 MHz,  $\text{CDCl}_3$ ) spectrum of compound **3p**

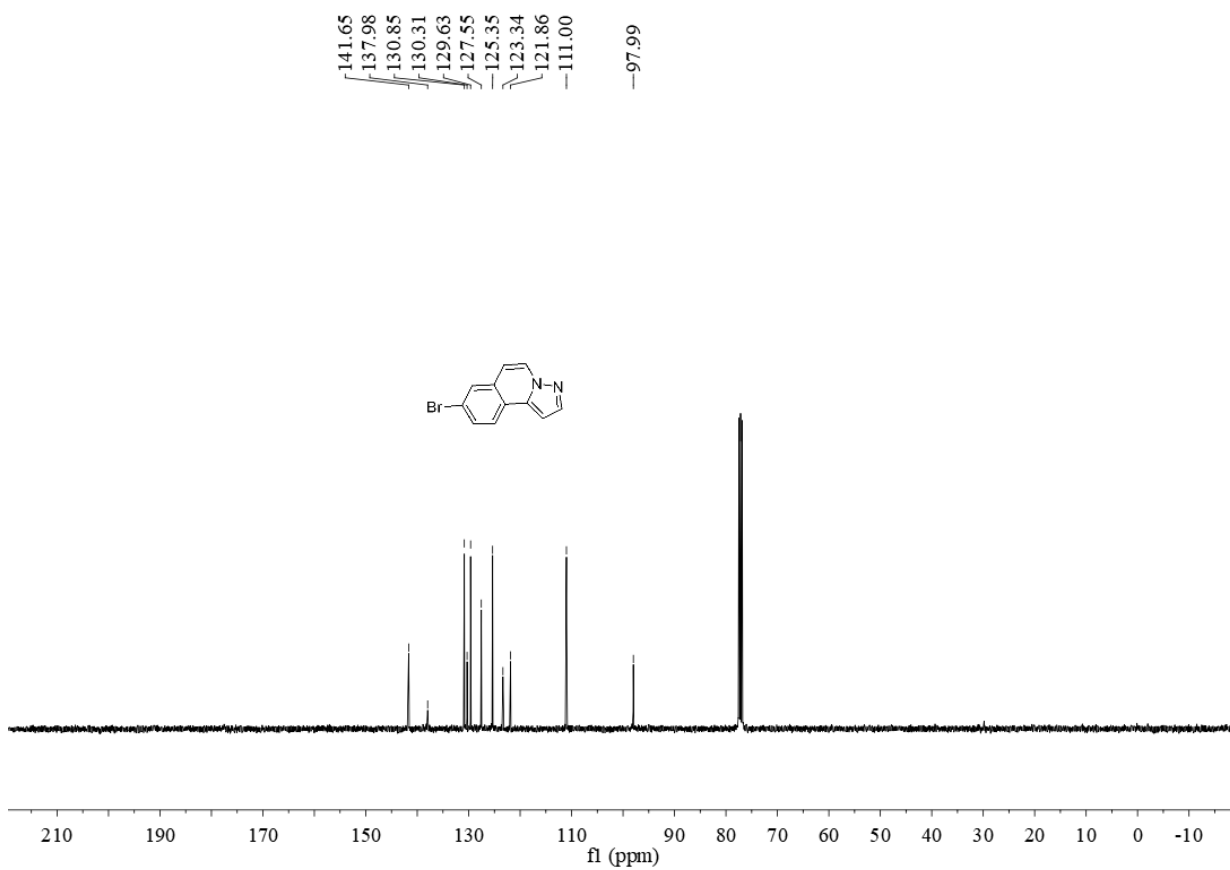

<sup>1</sup>H NMR (400 MHz, CDCl<sub>3</sub>) spectrum of compound **3q**

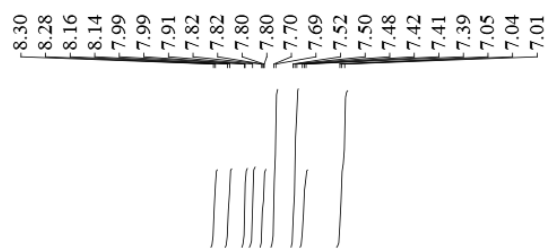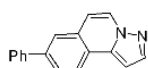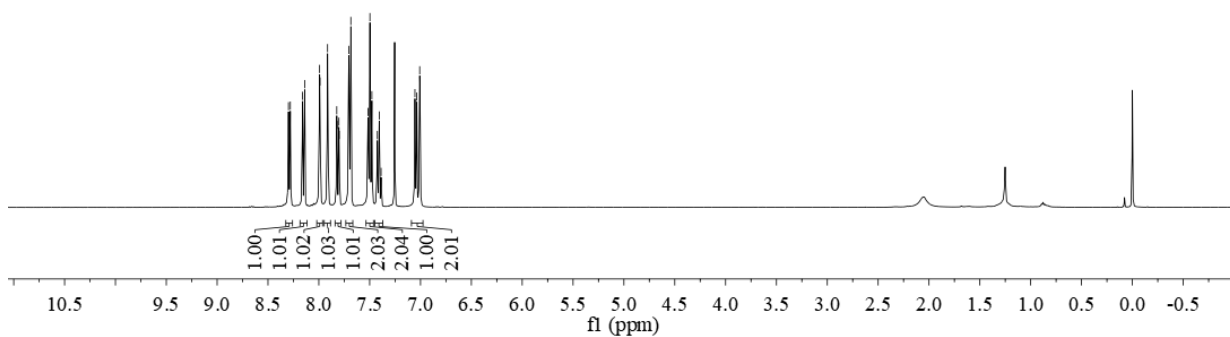

<sup>13</sup>C NMR (100 MHz, CDCl<sub>3</sub>) spectrum of compound **3q**

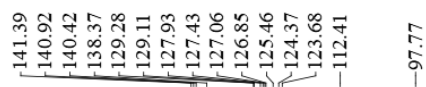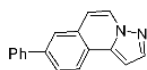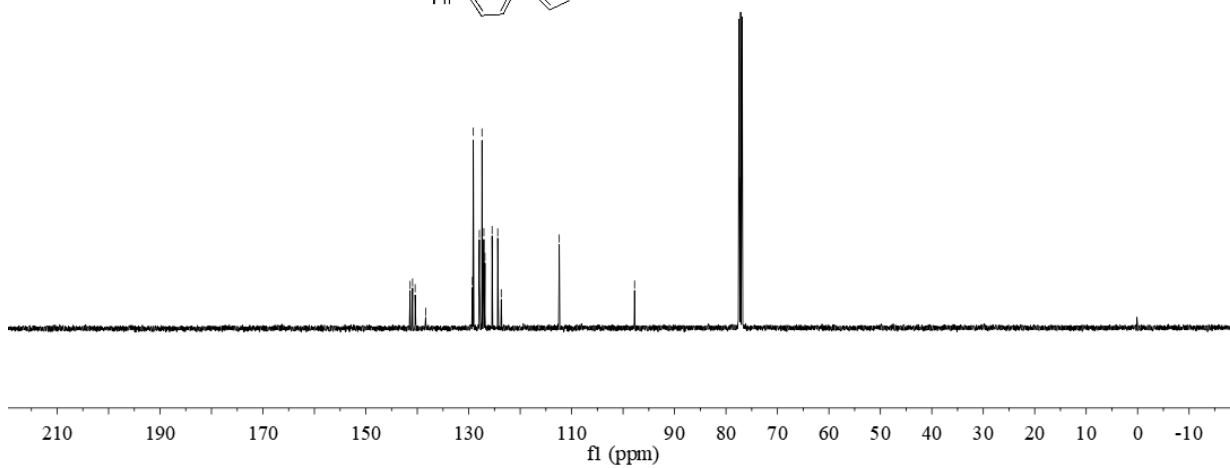

<sup>1</sup>H NMR (400 MHz, CDCl<sub>3</sub>) spectrum of compound **3r**

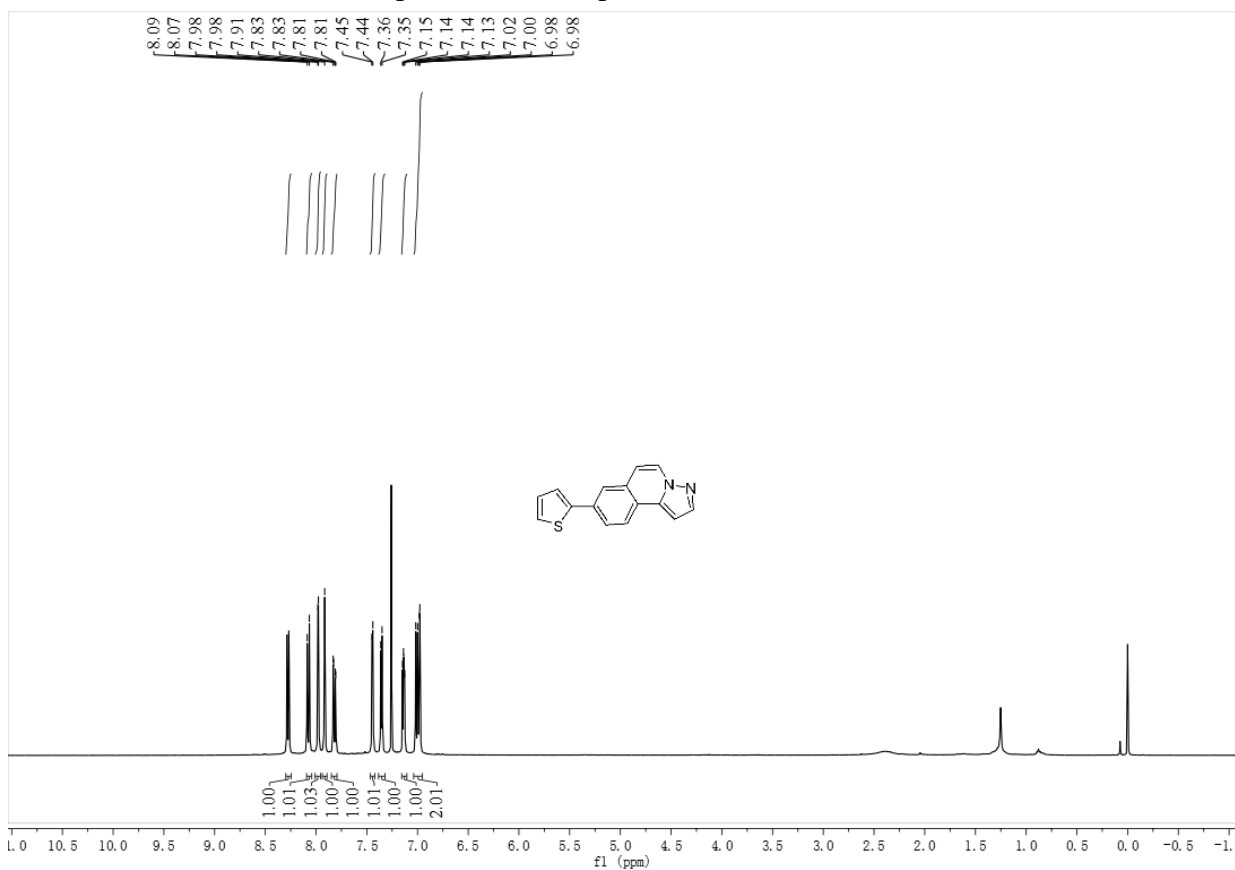

<sup>13</sup>C NMR (100 MHz, CDCl<sub>3</sub>) spectrum of compound **3r**

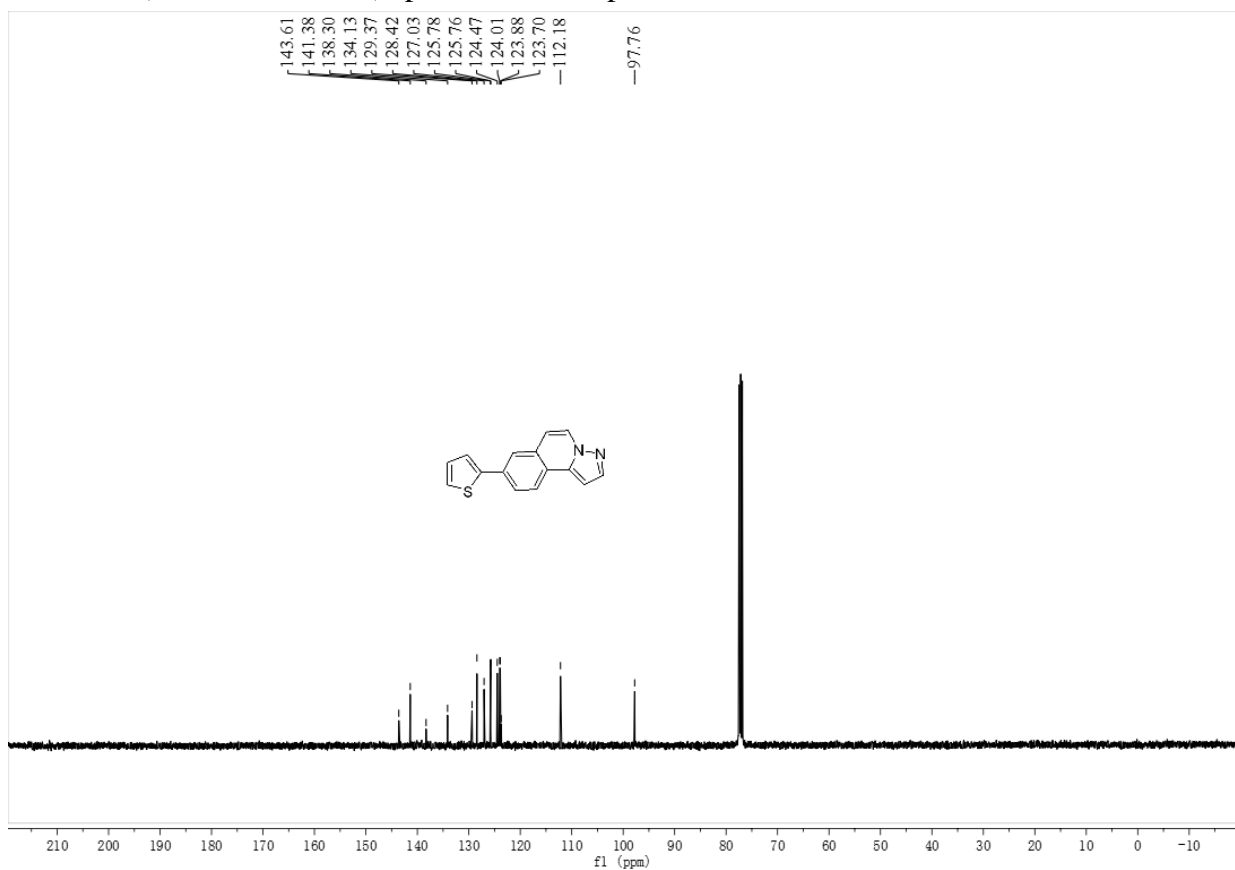

$^1\text{H}$  NMR (400 MHz,  $\text{CDCl}_3$ ) spectrum of compound **3s**

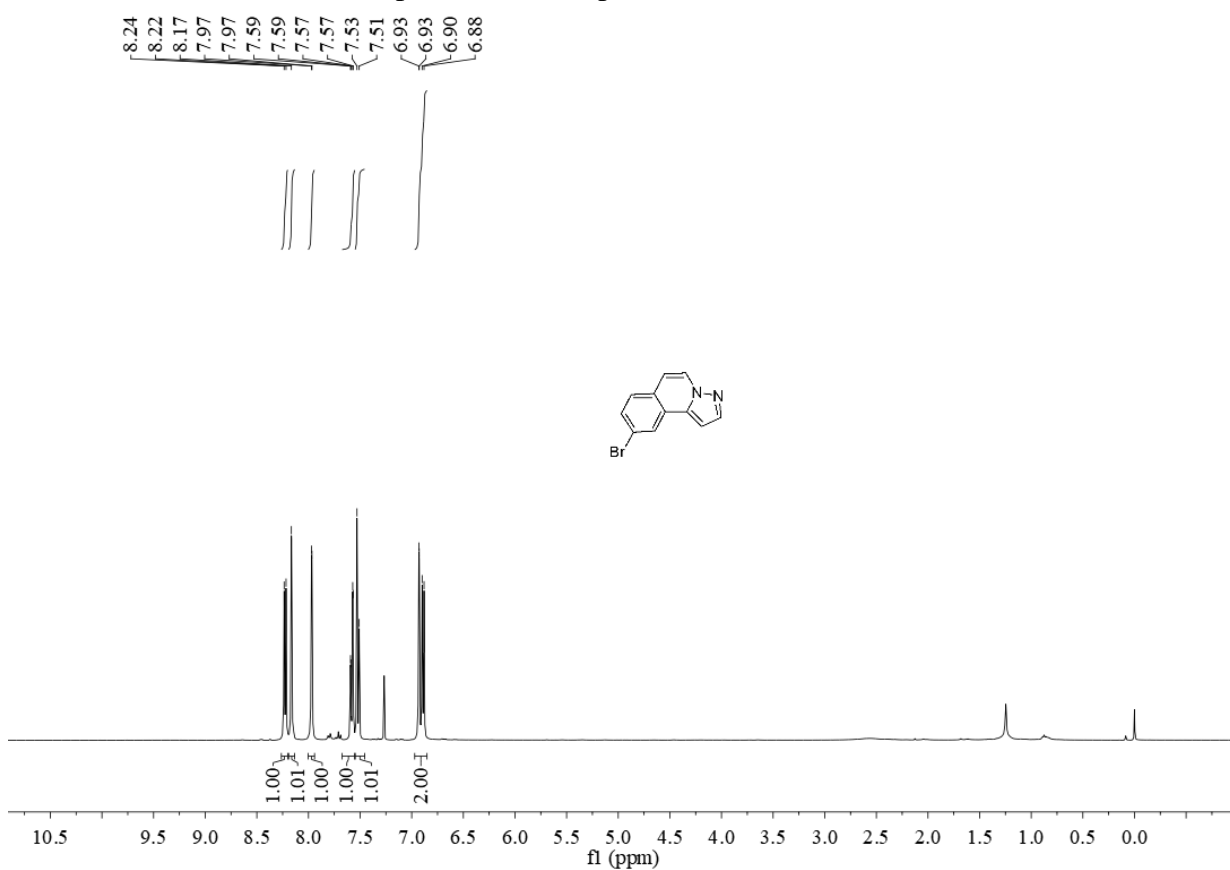

$^{13}\text{C}$  NMR (100 MHz,  $\text{CDCl}_3$ ) spectrum of compound **3s**

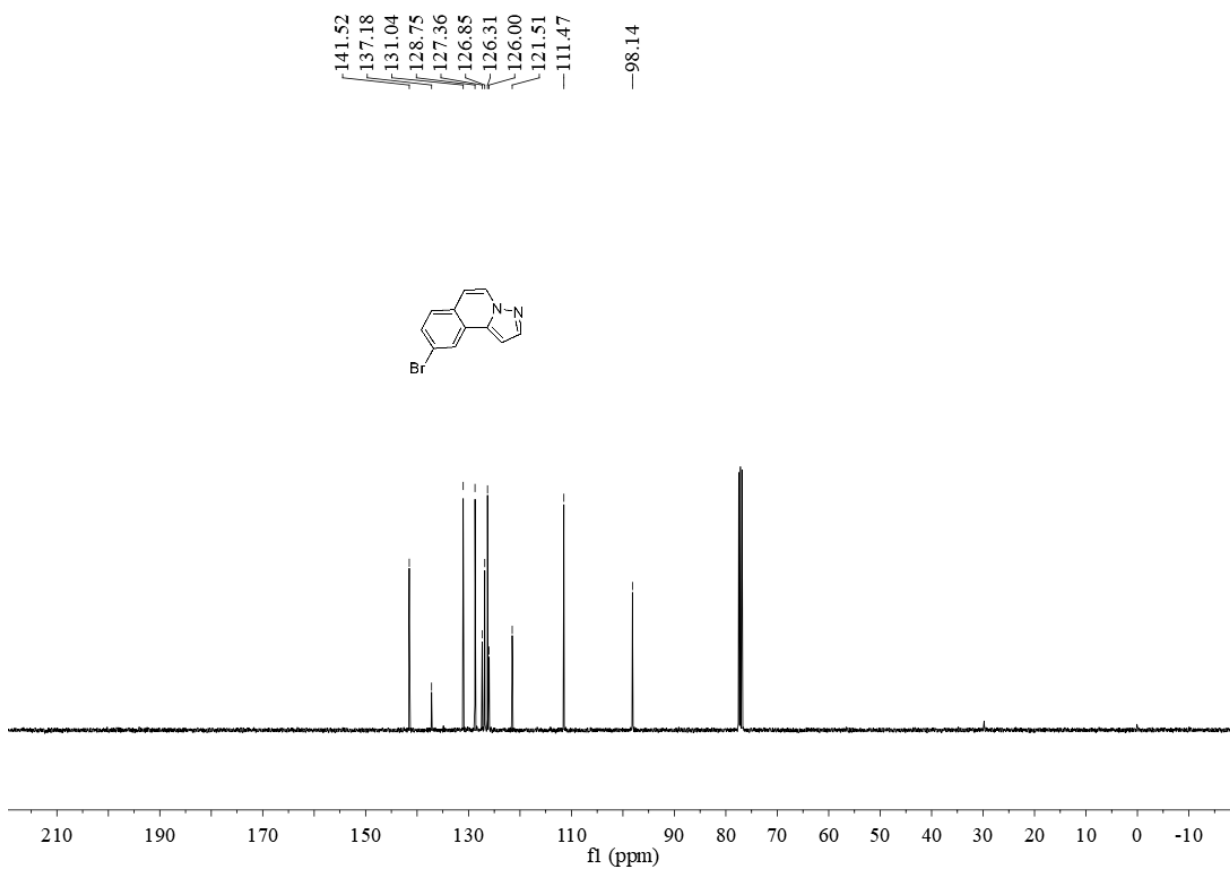

$^1\text{H}$  NMR (400 MHz,  $\text{CDCl}_3$ ) spectrum of compound **3t**

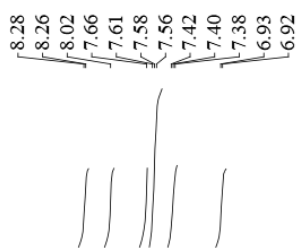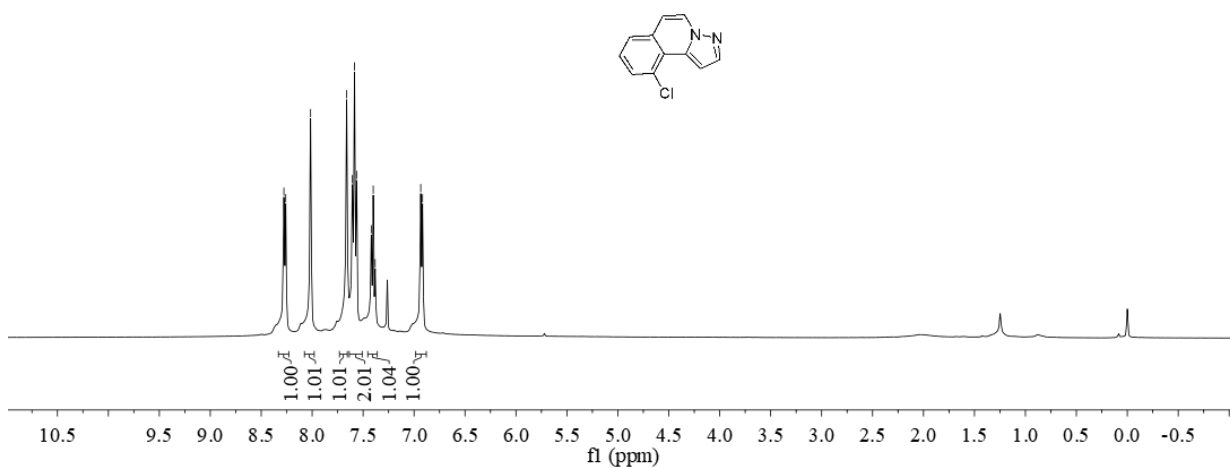

$^{13}\text{C}$  NMR (100 MHz,  $\text{CDCl}_3$ ) spectrum of compound **3t**

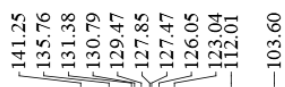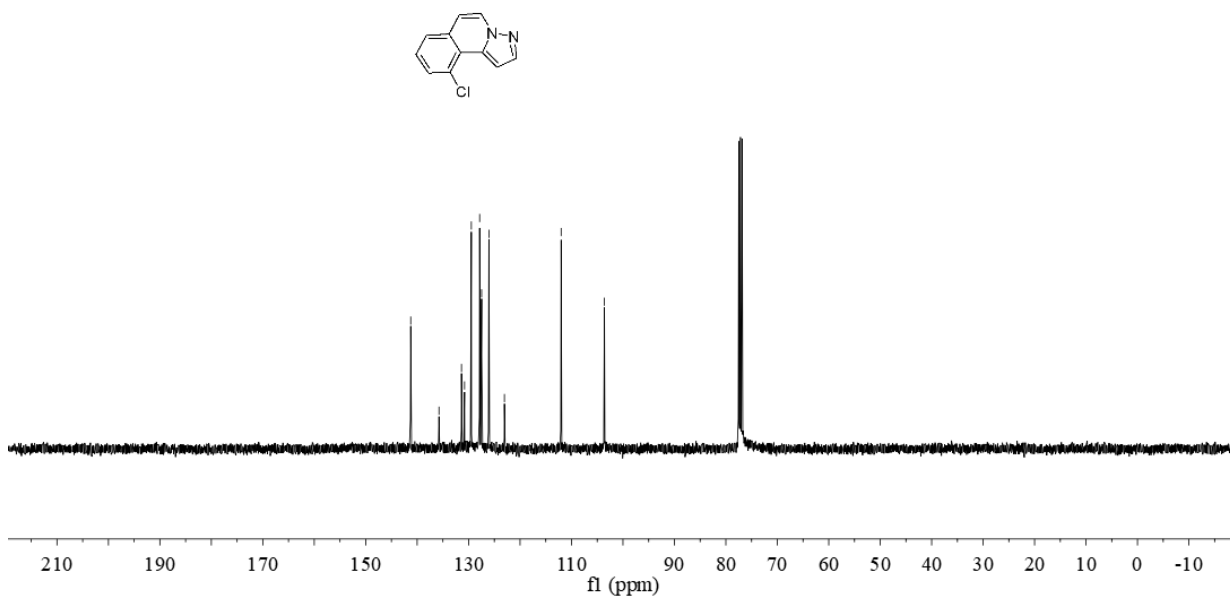

$^1\text{H}$  NMR (400 MHz,  $\text{CDCl}_3$ ) spectrum of compound **3u**

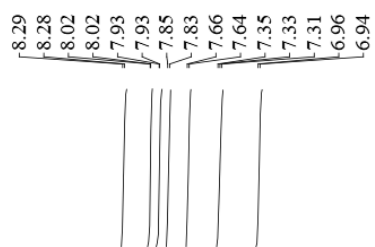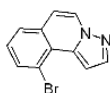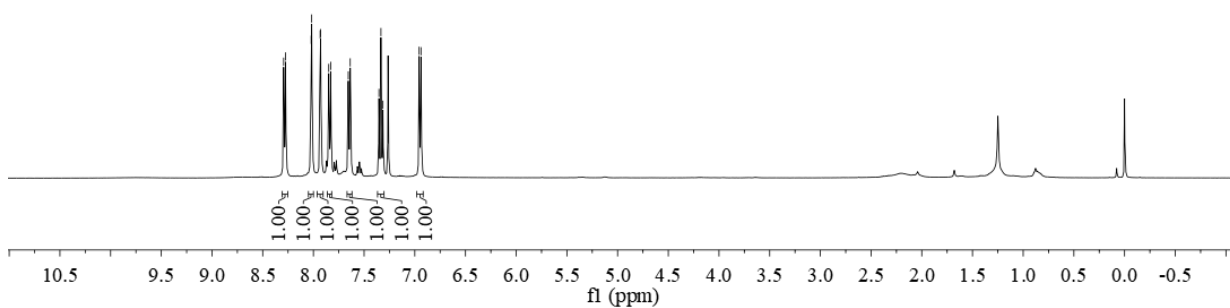

$^{13}\text{C}$  NMR (100 MHz,  $\text{CDCl}_3$ ) spectrum of compound **3u**

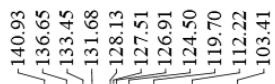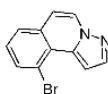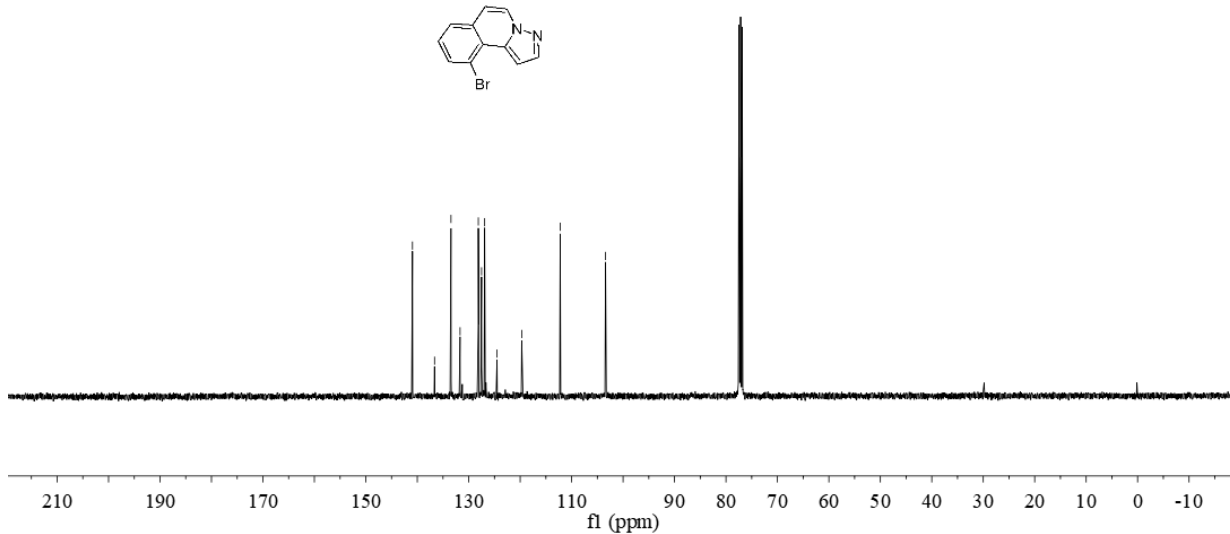



$^1\text{H}$  NMR (400 MHz,  $\text{CDCl}_3$ ) spectrum of compound **3v**

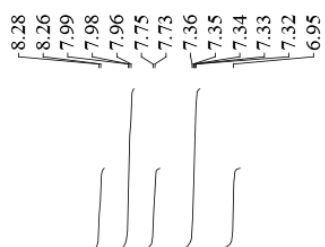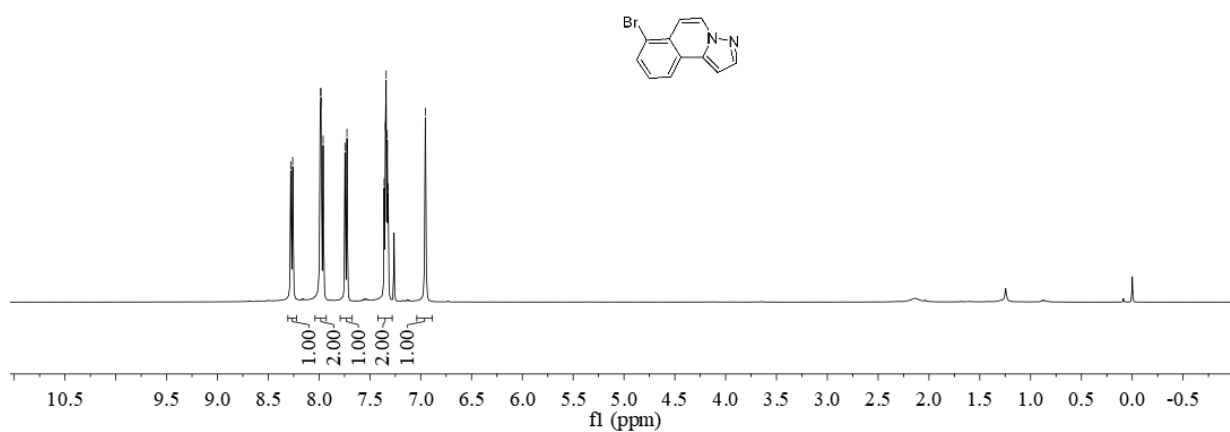

$^{13}\text{C}$  NMR (100 MHz,  $\text{CDCl}_3$ ) spectrum of compound **3v**

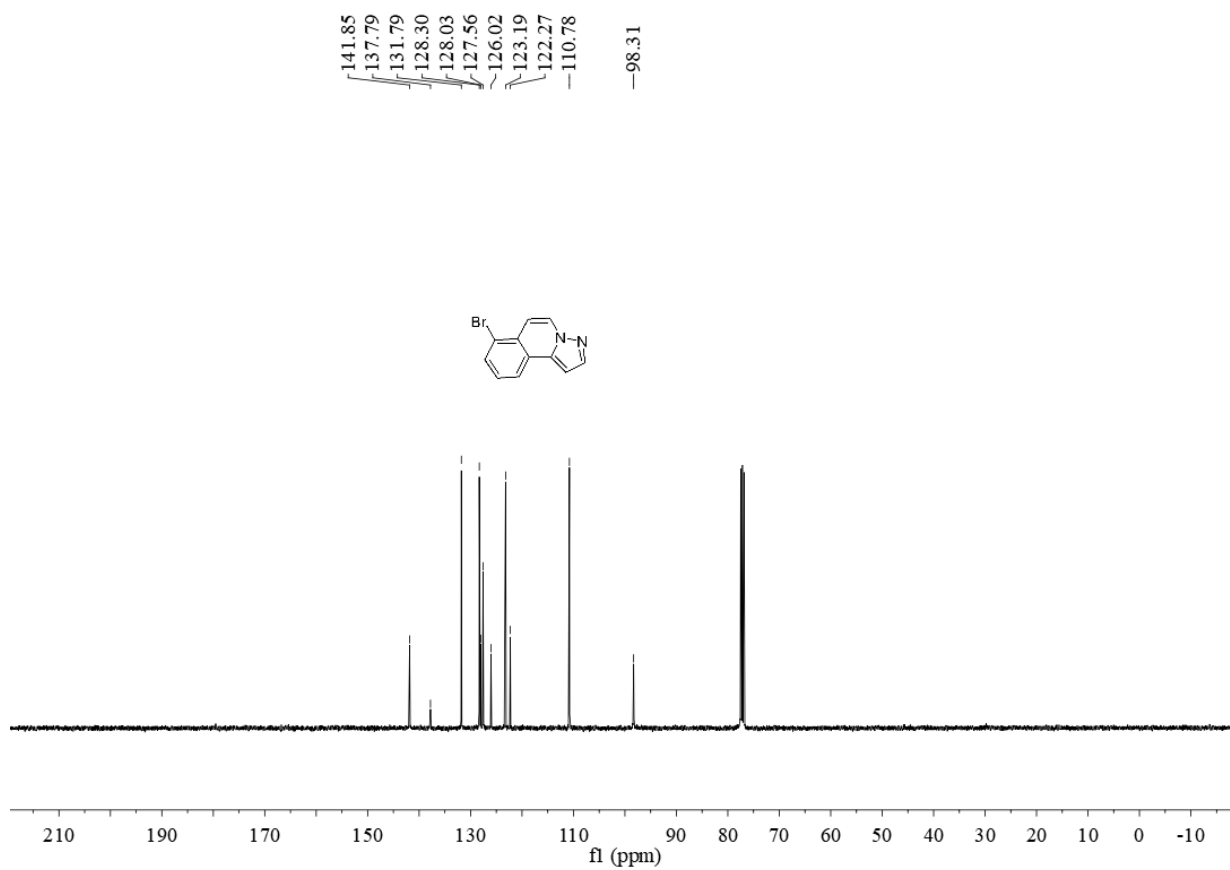

<sup>1</sup>H NMR (400 MHz, CDCl<sub>3</sub>) spectrum of compound **3w**

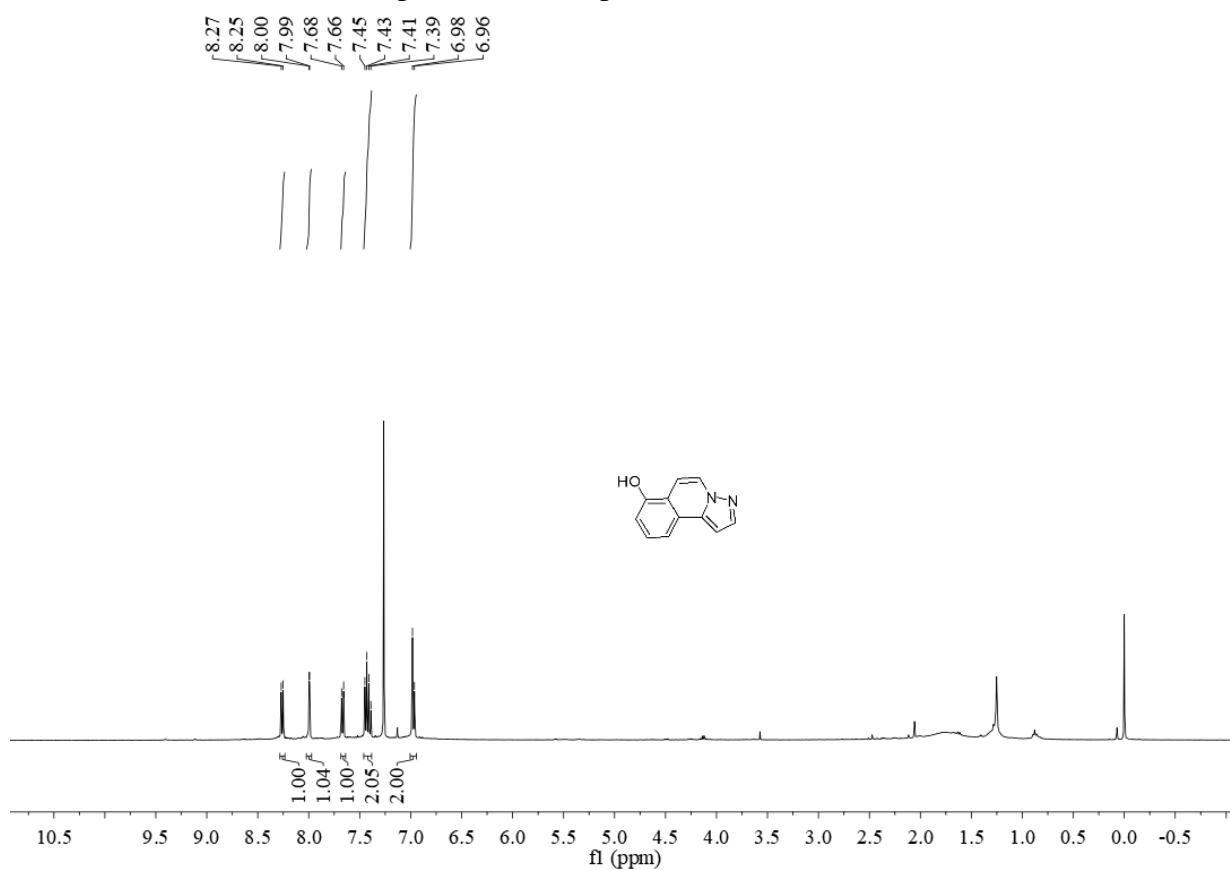

<sup>13</sup>C NMR (100 MHz, CDCl<sub>3</sub>) spectrum of compound **3w**

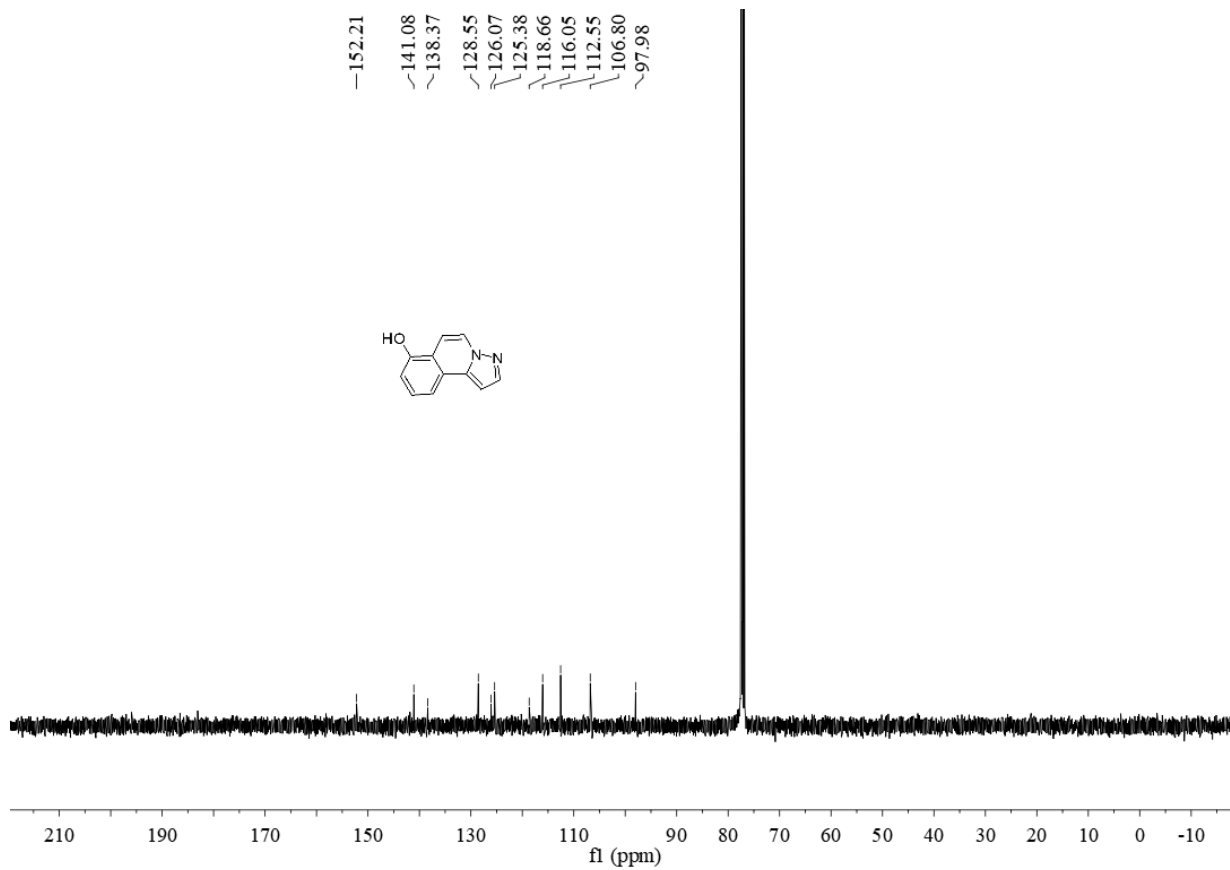

<sup>1</sup>H NMR (400 MHz, Acetone-D<sub>6</sub>) spectrum of compound **5a**

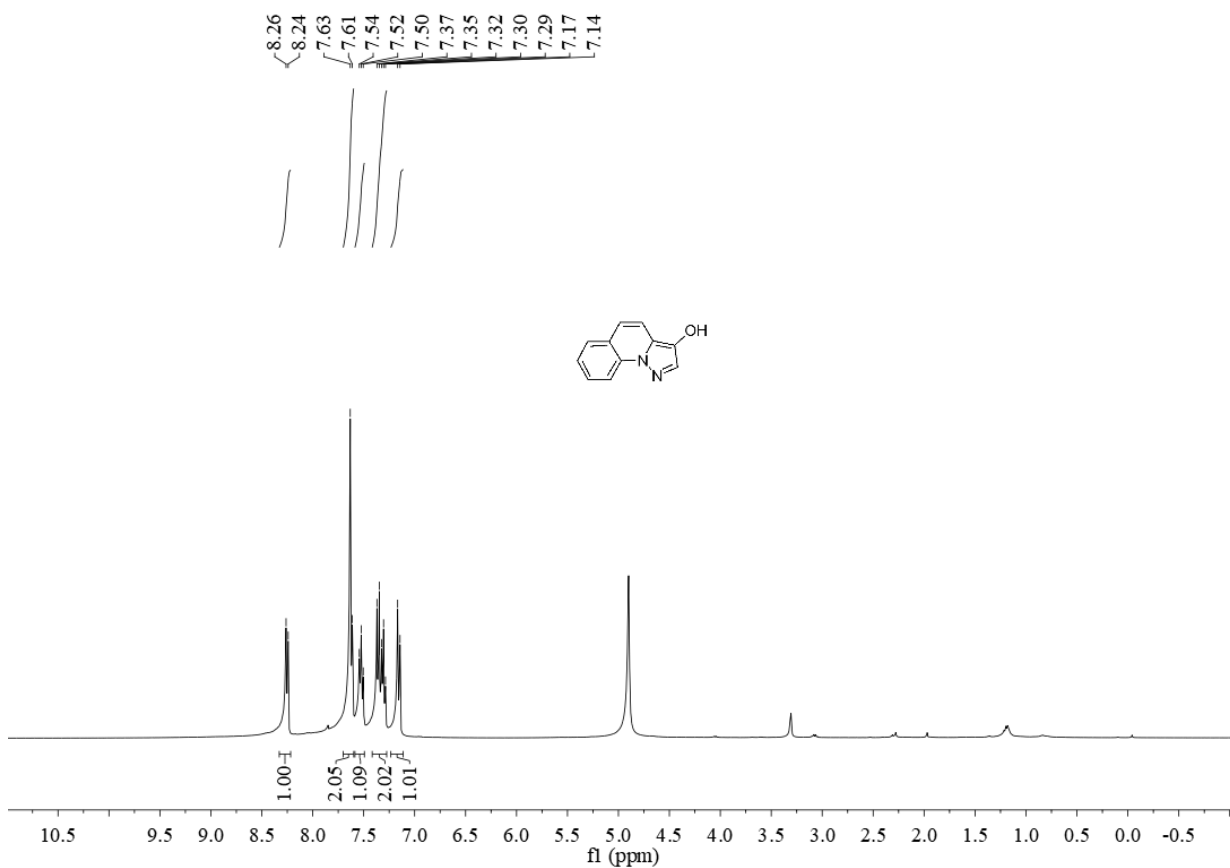

<sup>13</sup>C NMR (100 MHz, Acetone-D<sub>6</sub>) spectrum of compound **5a**

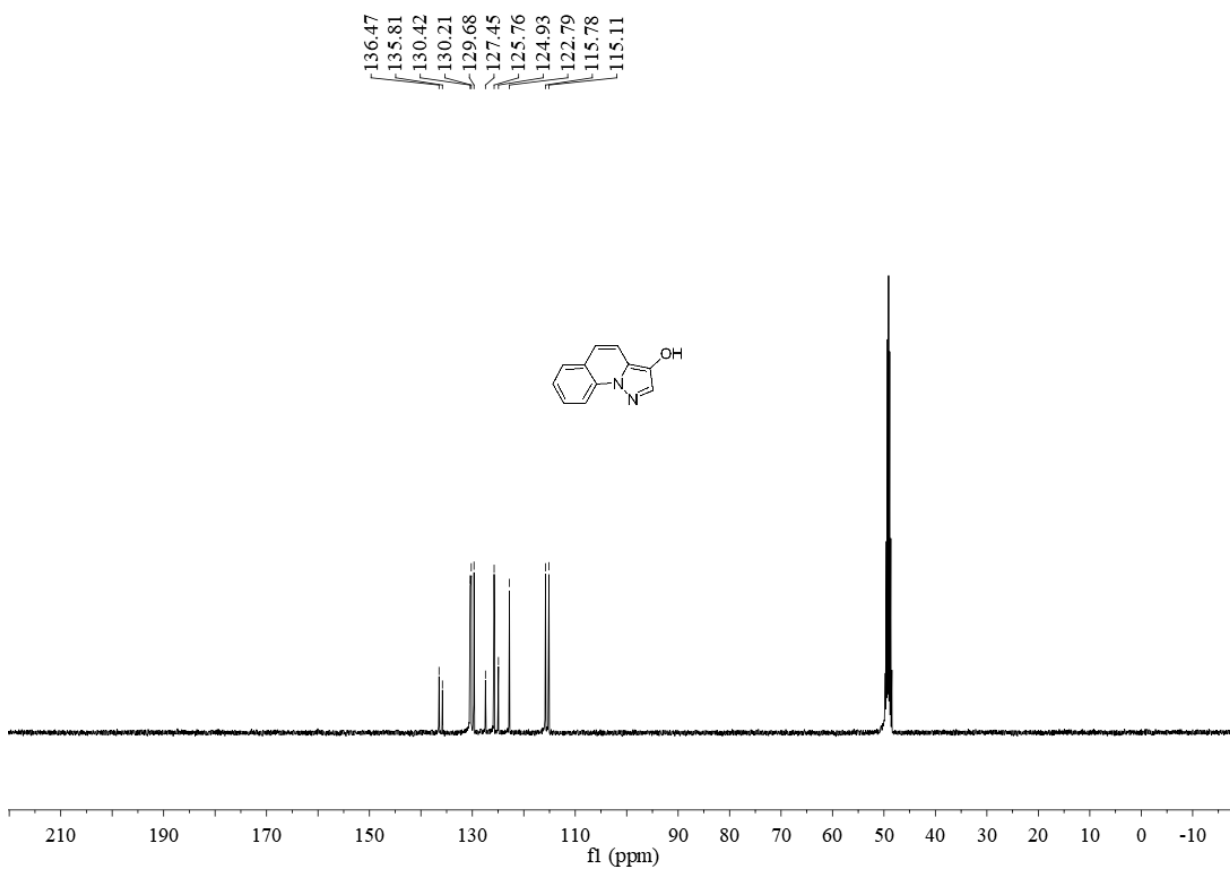

<sup>1</sup>H NMR (400 MHz, Methanol-D<sub>4</sub>) spectrum of compound **5b**

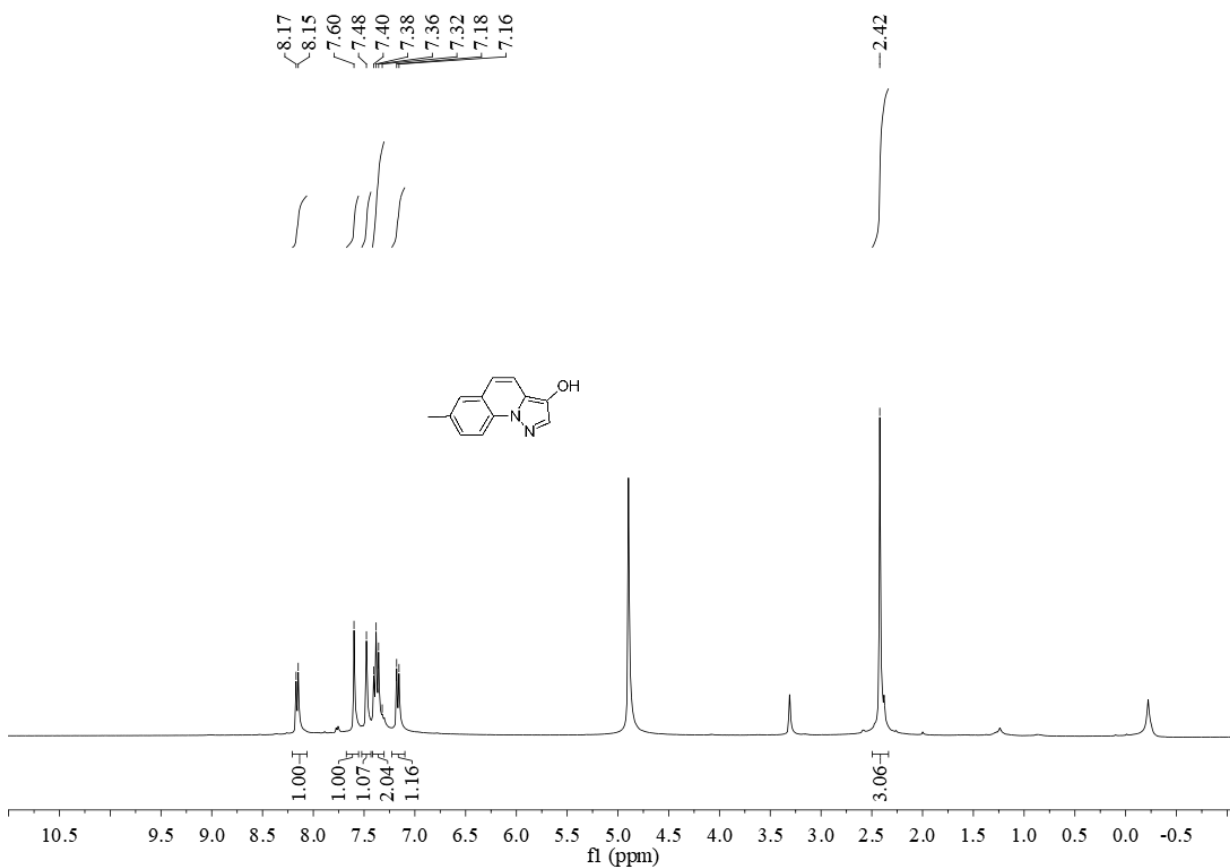

<sup>13</sup>C NMR (100 MHz, Methanol-D<sub>4</sub>) spectrum of compound **5b**

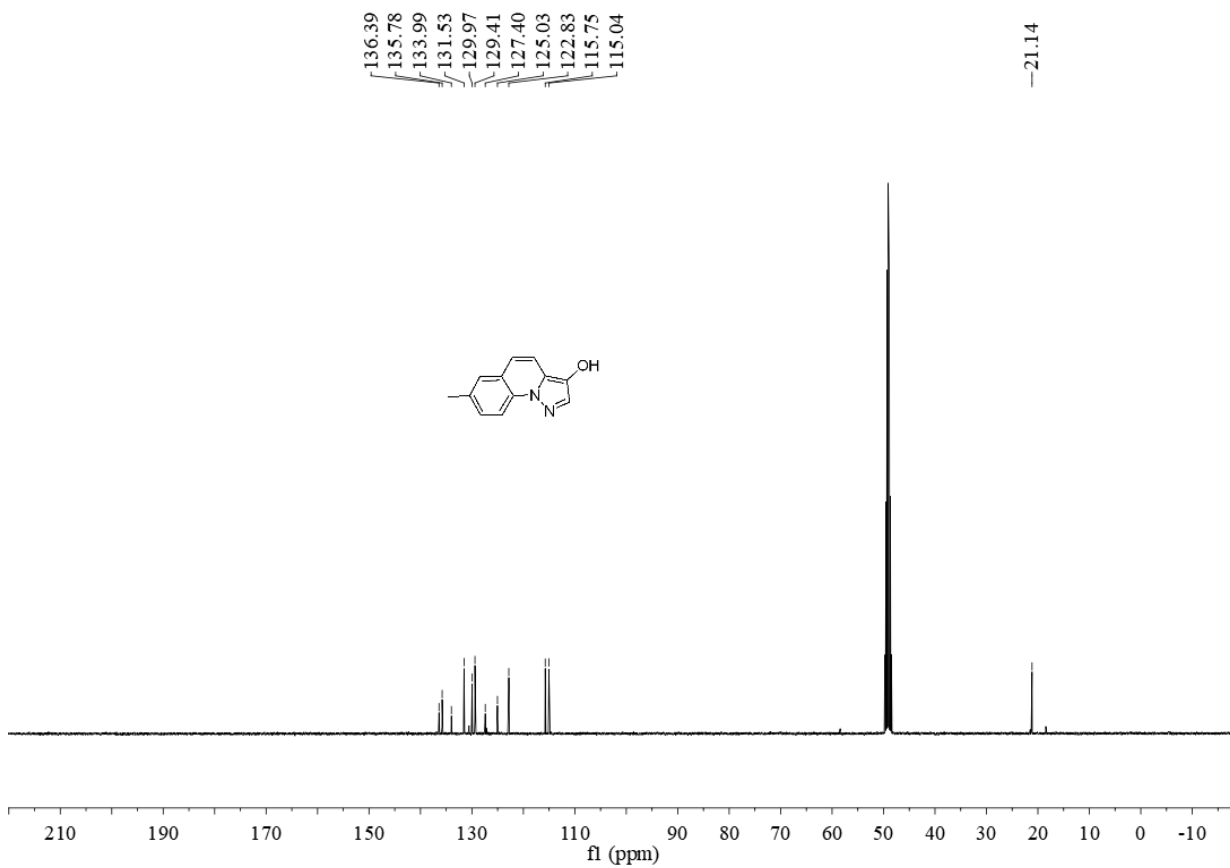

<sup>1</sup>H NMR (400 MHz, Acetone-D<sub>6</sub>) spectrum of compound **5c**

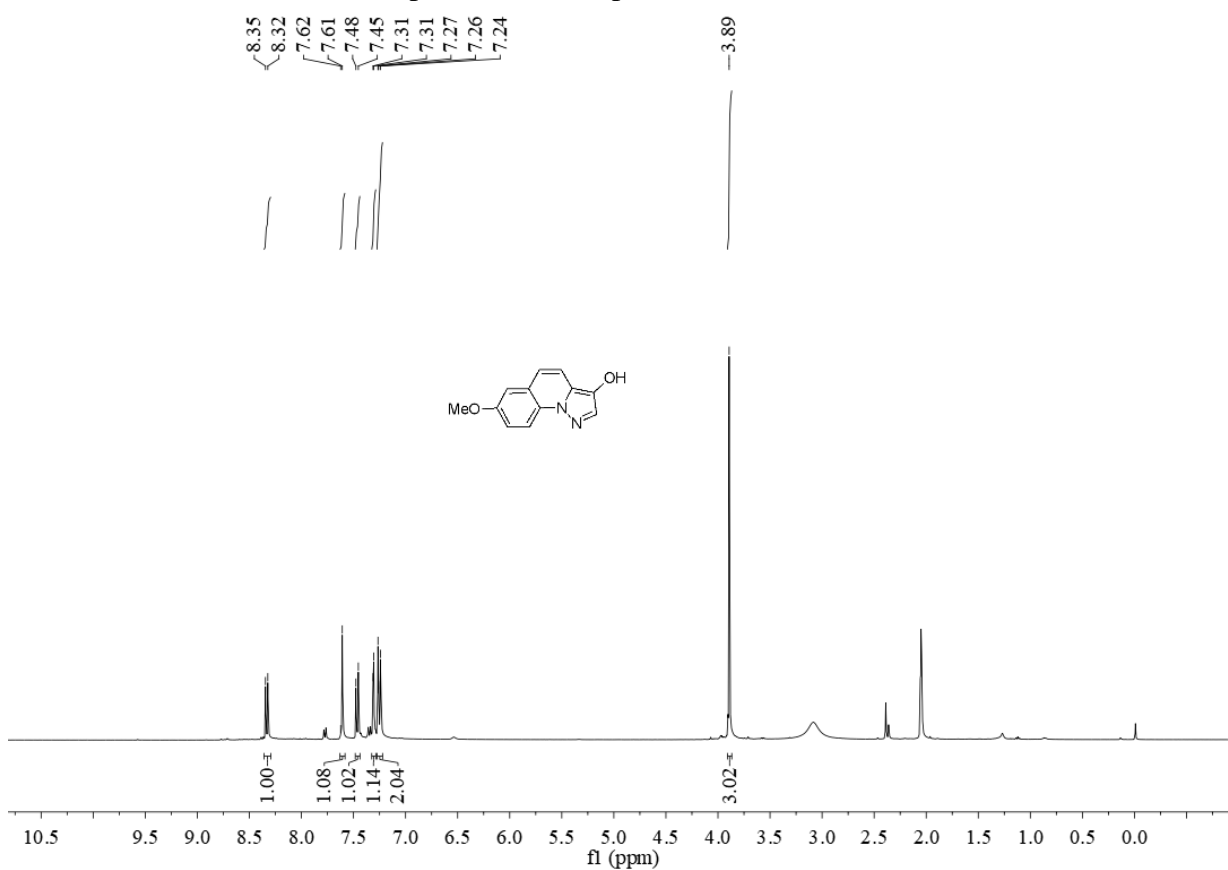

<sup>13</sup>C NMR (100 MHz, Acetone-D<sub>6</sub>) spectrum of compound **5c**

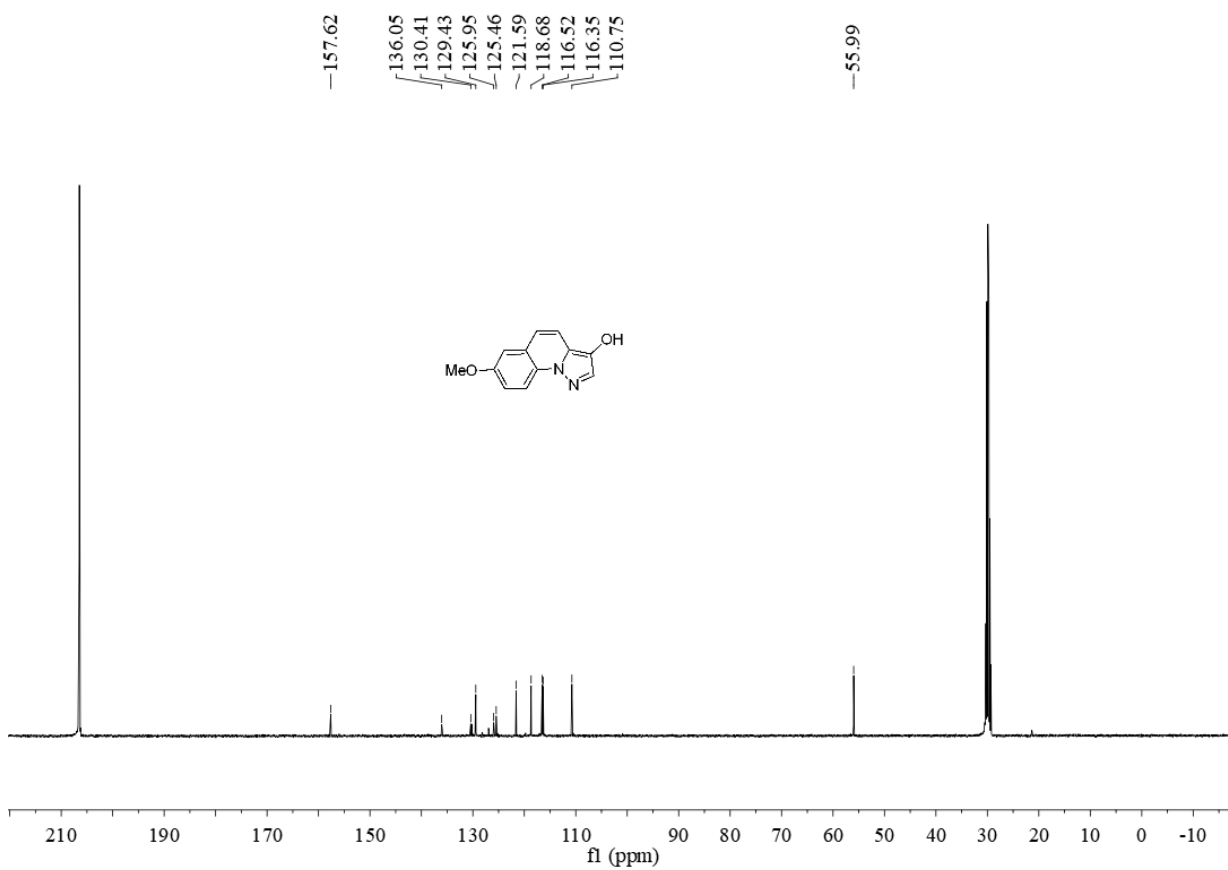

<sup>1</sup>H NMR (400 MHz, Methanol-D4) spectrum of compound **5d**

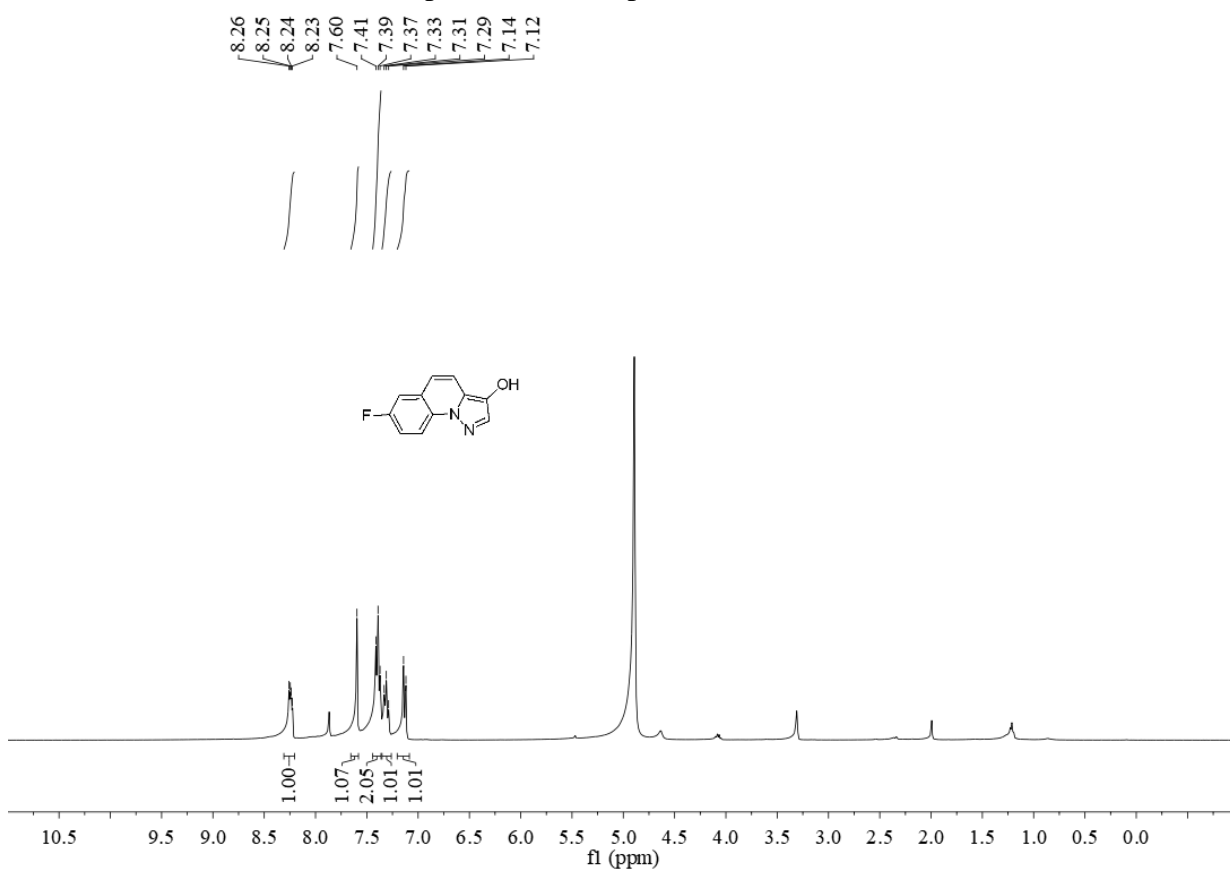

<sup>13</sup>C NMR (100 MHz, Methanol-D4) spectrum of compound **5d**

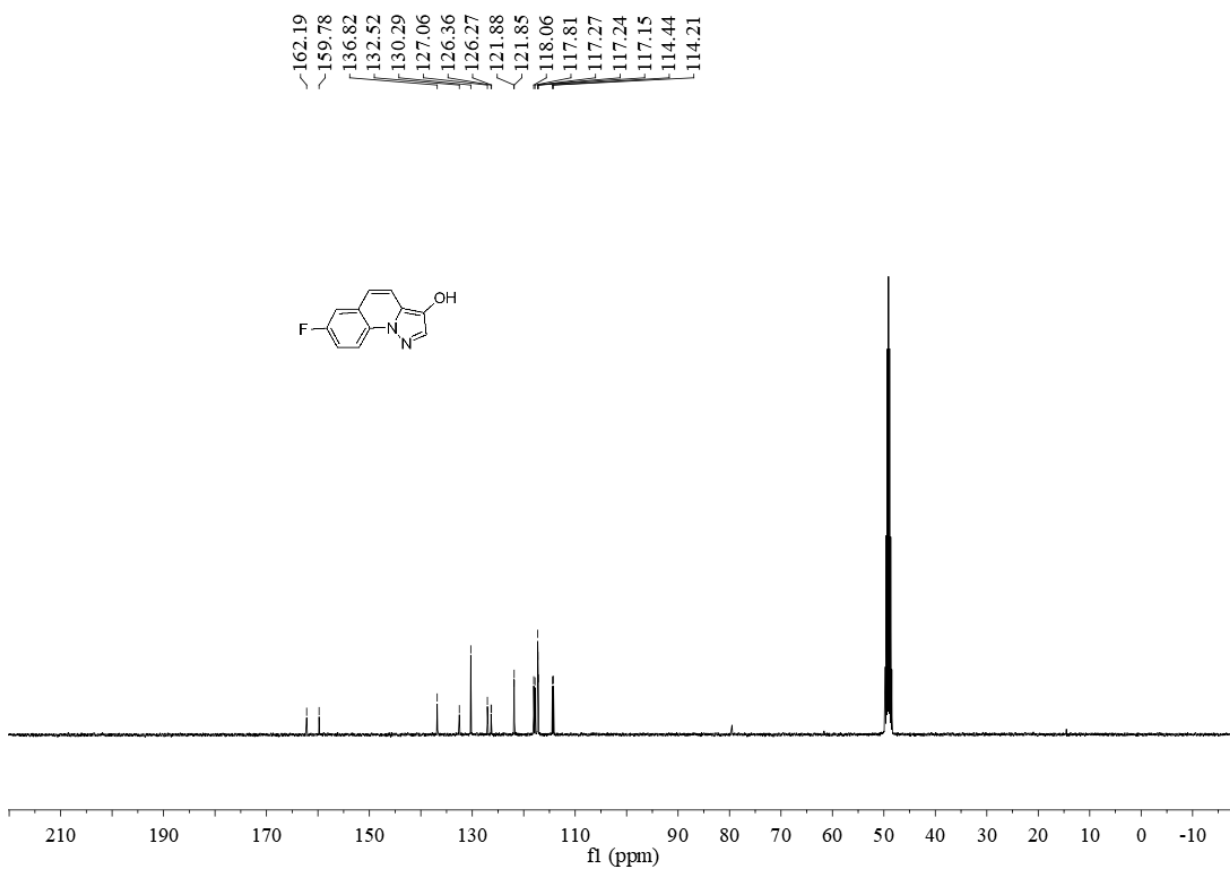

$^{19}\text{F}$  NMR (376 MHz, Methanol-D<sub>4</sub>) spectrum of compound **5d**

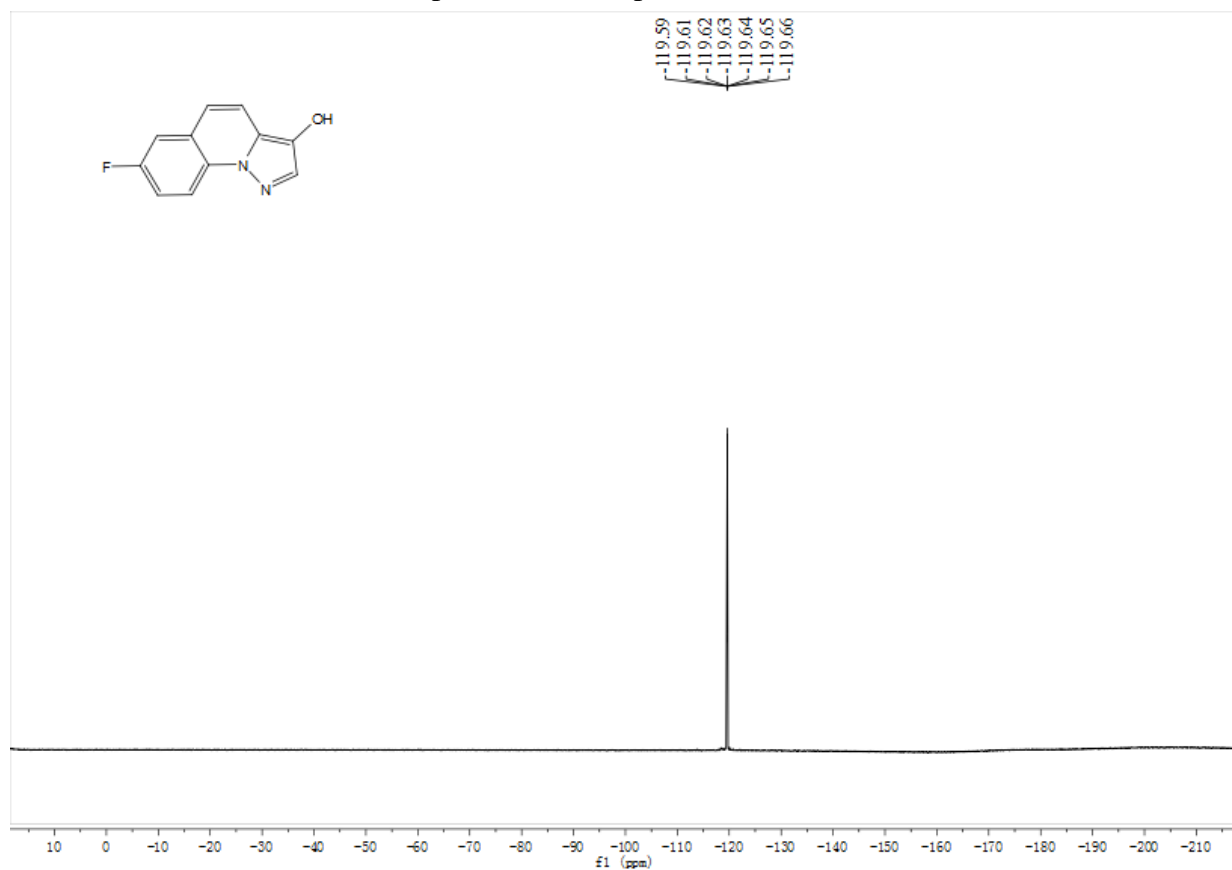

<sup>1</sup>H NMR (400 MHz, Acetone-D6) spectrum of compound **5e**

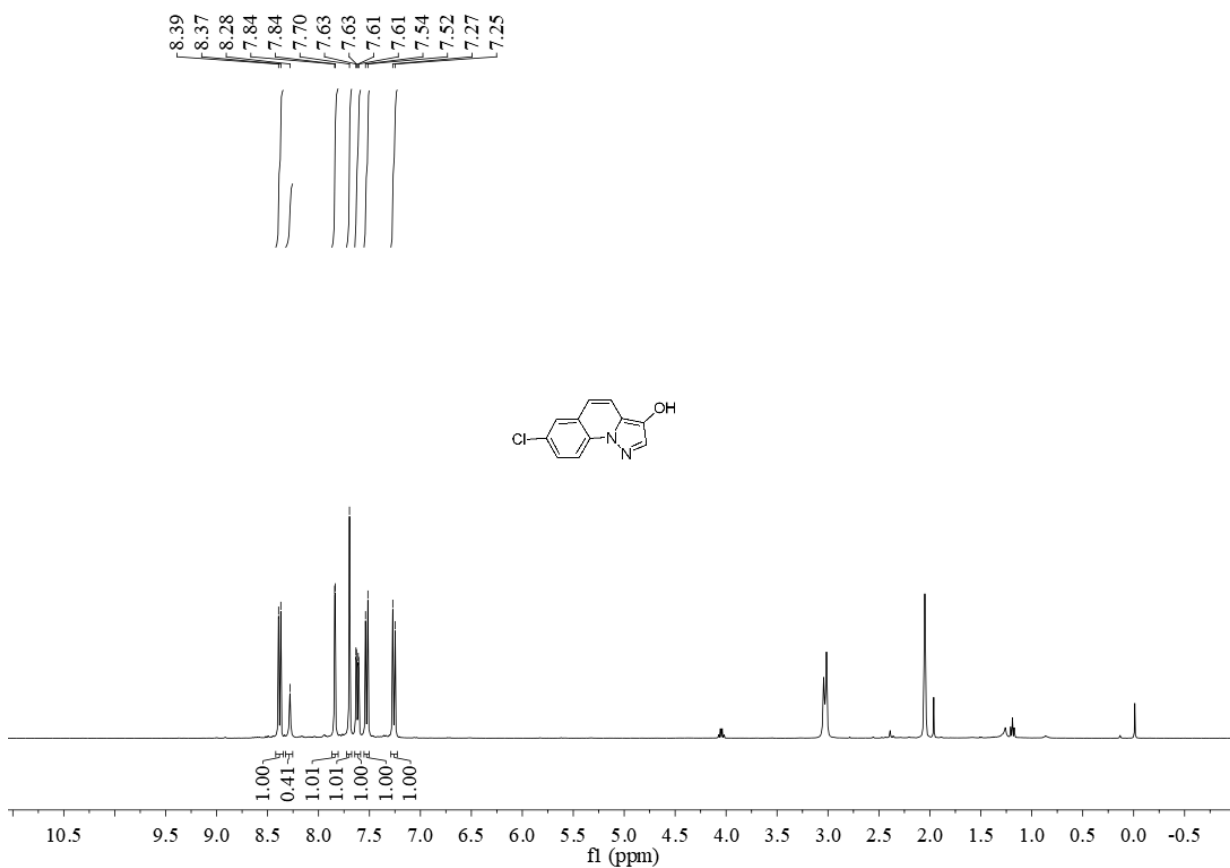

<sup>13</sup>C NMR (100 MHz, Acetone-D6) spectrum of compound **5e**

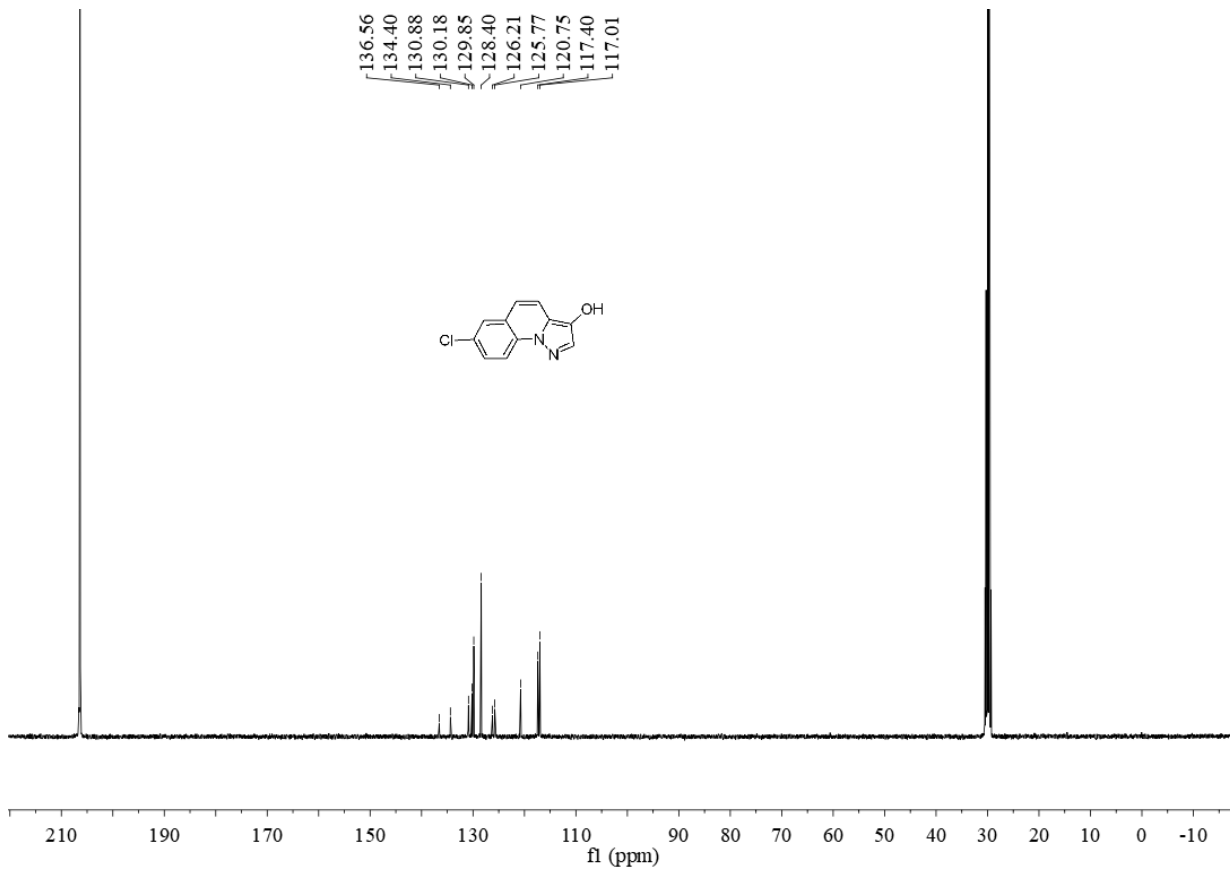



<sup>1</sup>H NMR (400 MHz, Methanol-D4) spectrum of compound **5f**

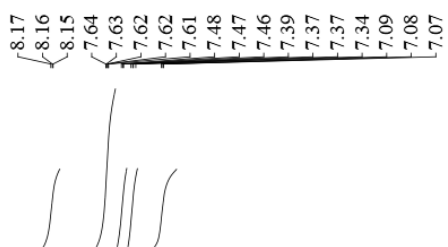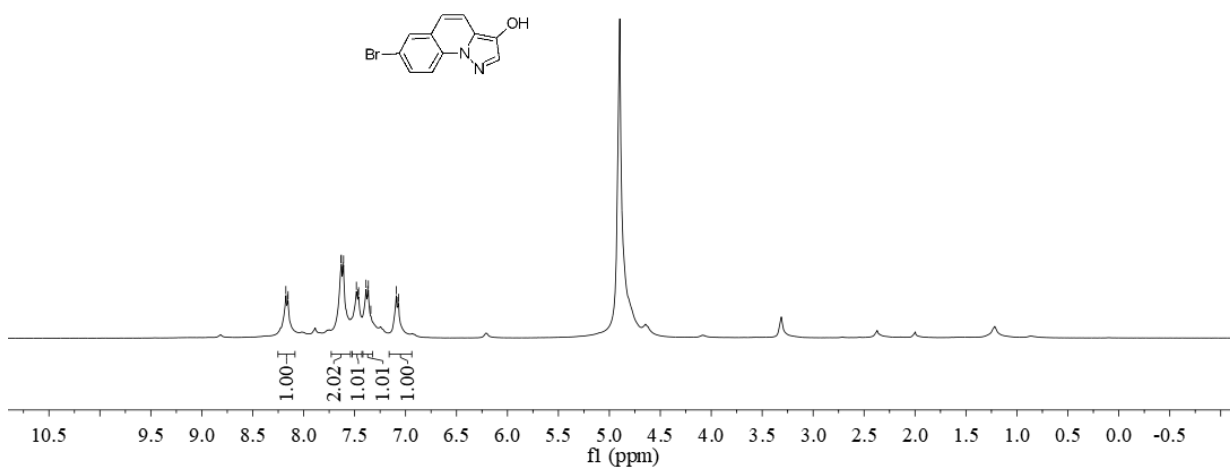

<sup>13</sup>C NMR (100 MHz, Methanol-D4) spectrum of compound **5f**

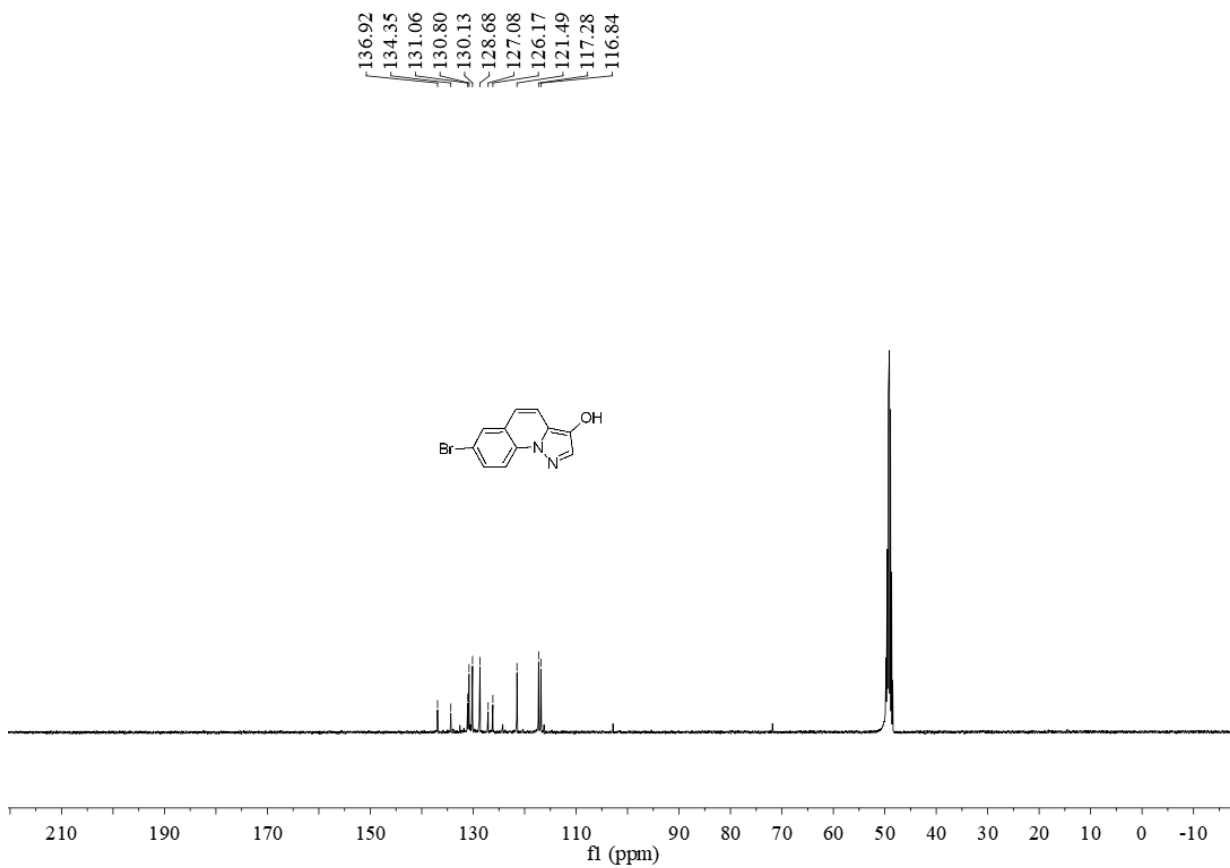

<sup>1</sup>H NMR (400 MHz, Methanol-D4) spectrum of compound **5g**

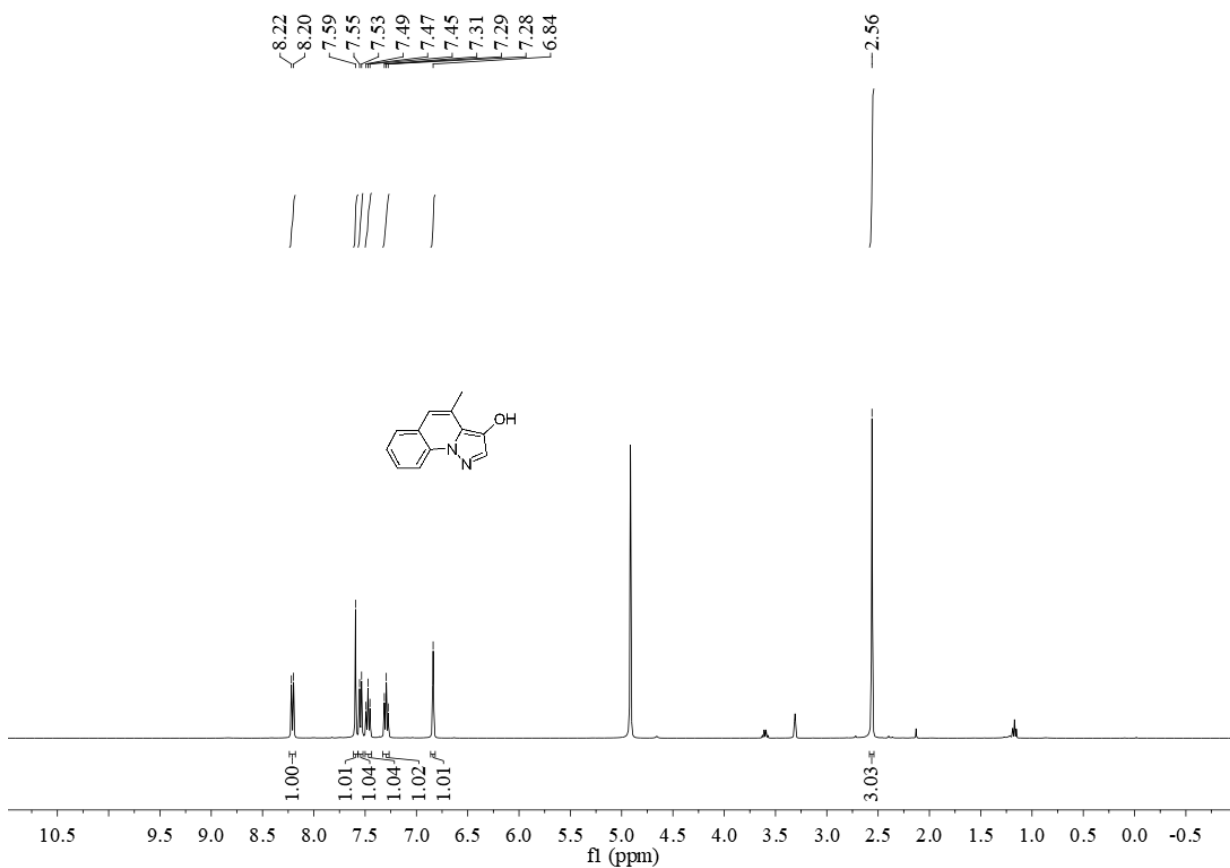

<sup>13</sup>C NMR (100 MHz, Methanol-D4) spectrum of compound **5g**

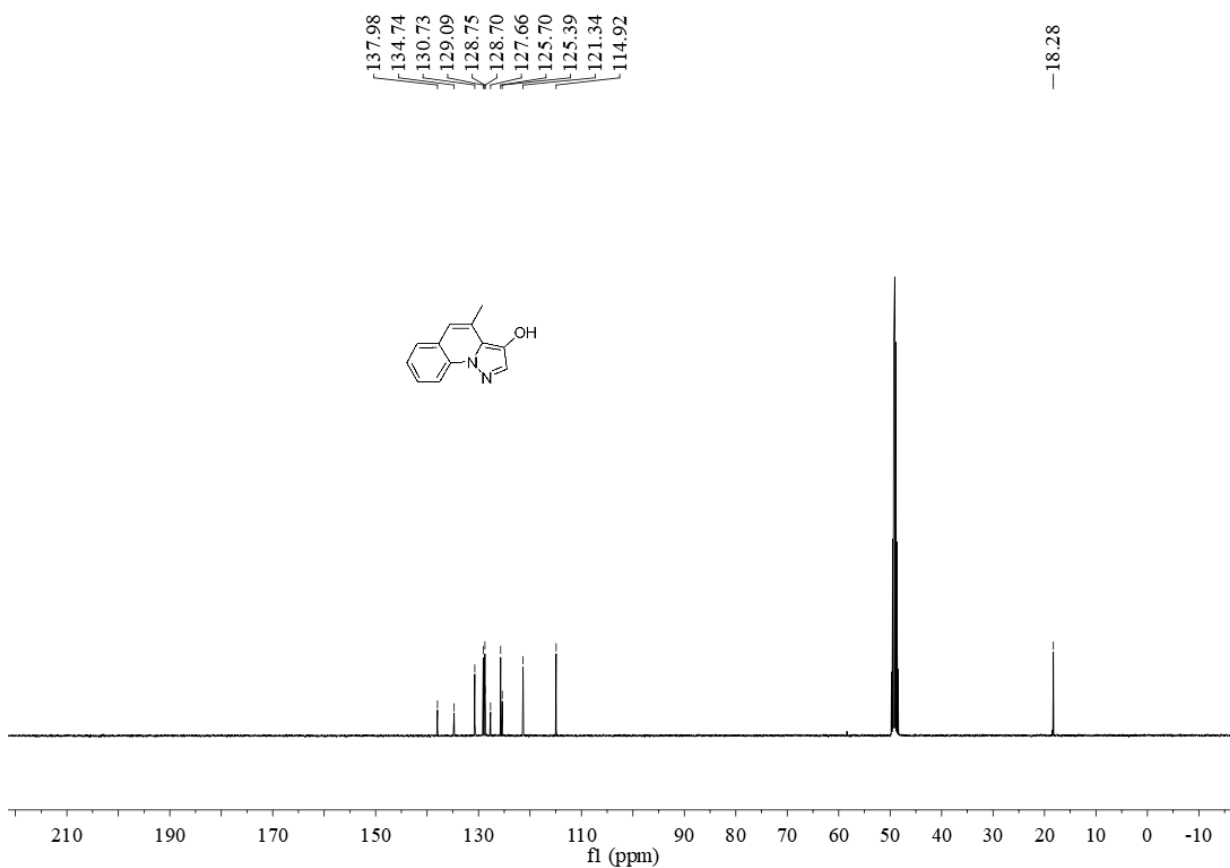

<sup>1</sup>H NMR (400 MHz, Methanol-D4) spectrum of compound **5h**

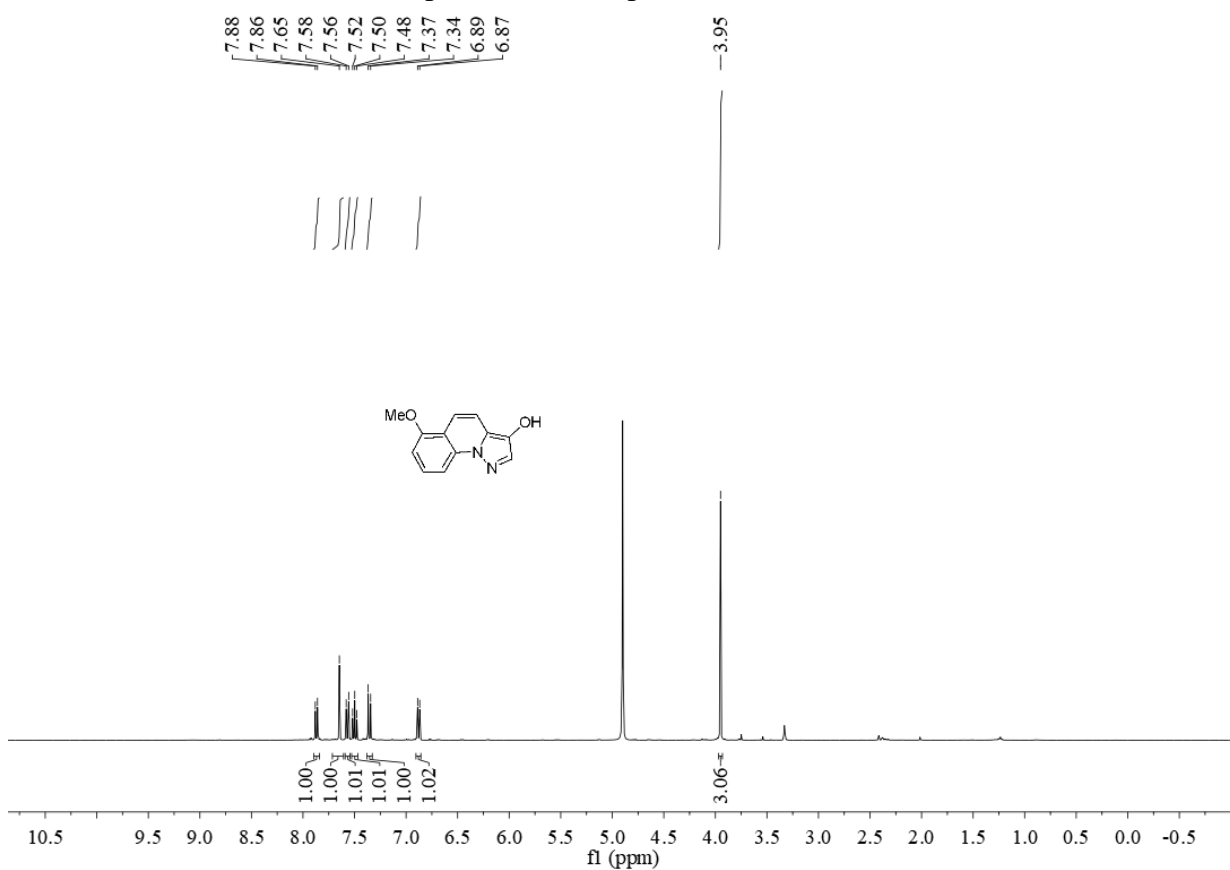

<sup>13</sup>C NMR (100 MHz, Methanol-D4) spectrum of compound **5h**

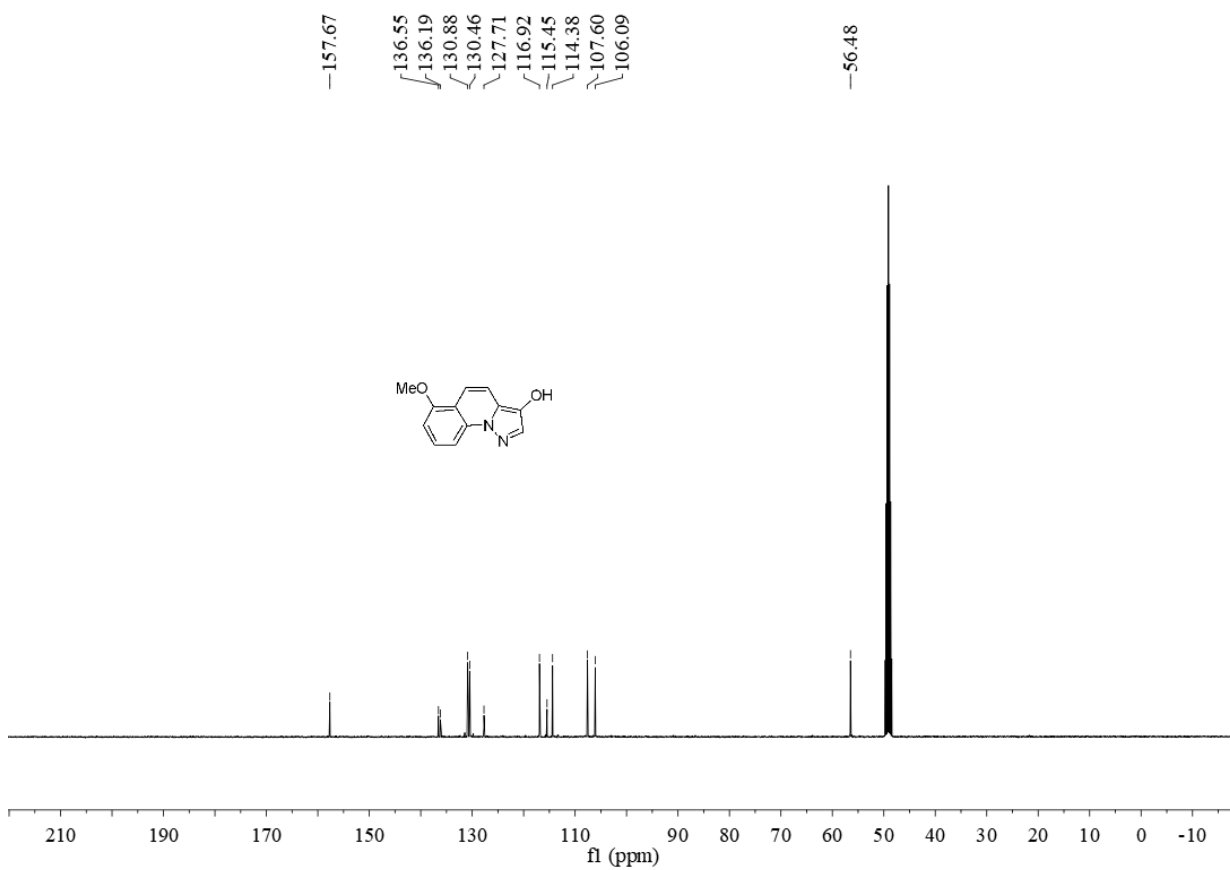

<sup>1</sup>H NMR (400 MHz, Methanol-D<sub>4</sub>) spectrum of compound **5i**

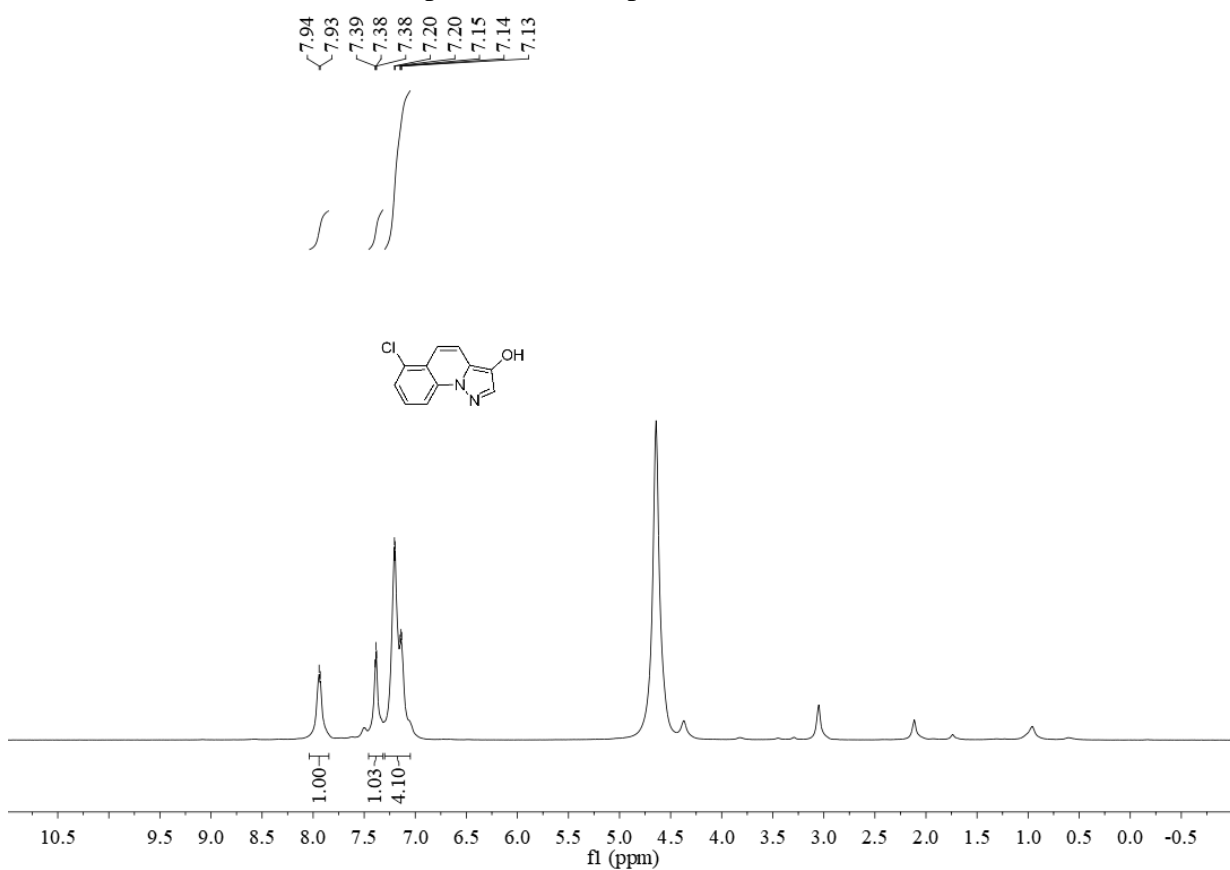

<sup>13</sup>C NMR (100 MHz, Methanol-D<sub>4</sub>) spectrum of compound **5i**

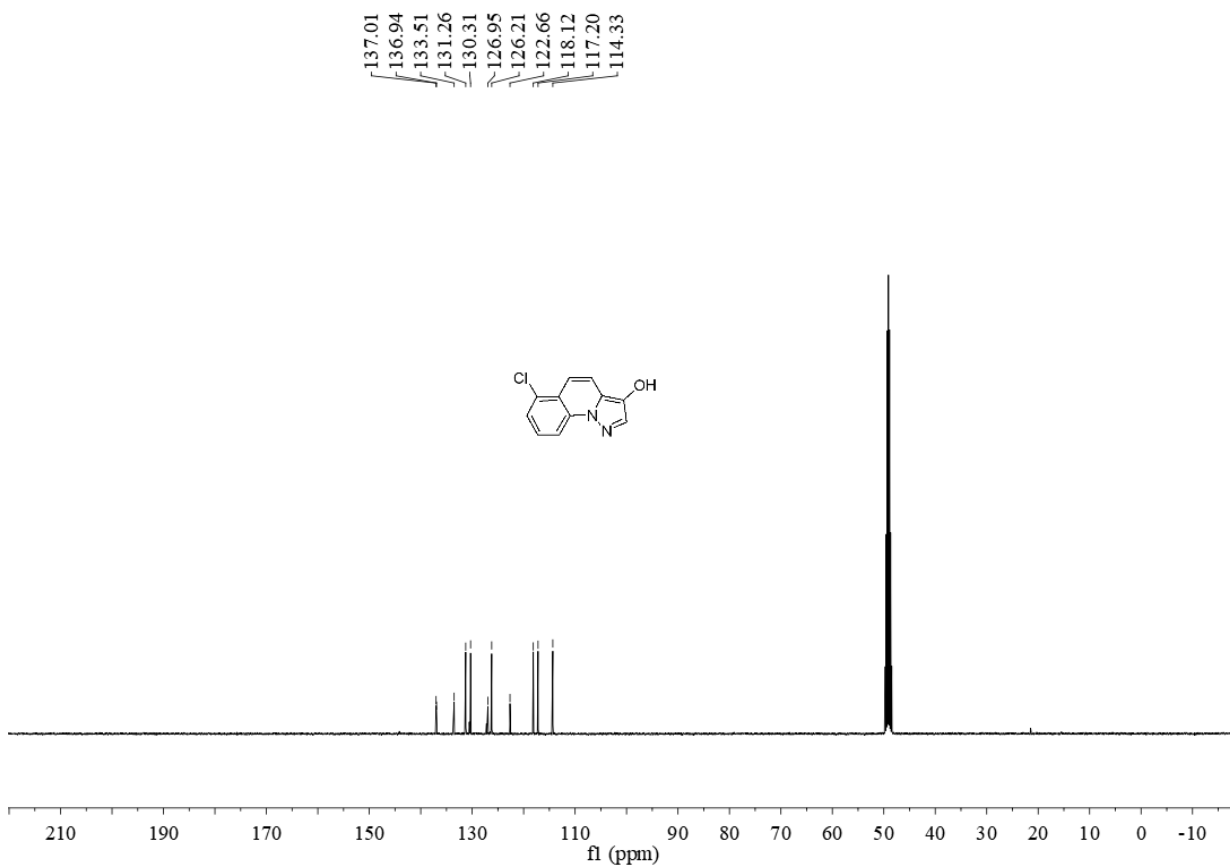

<sup>1</sup>H NMR (400 MHz, Methanol-D<sub>4</sub>) spectrum of compound **5j**

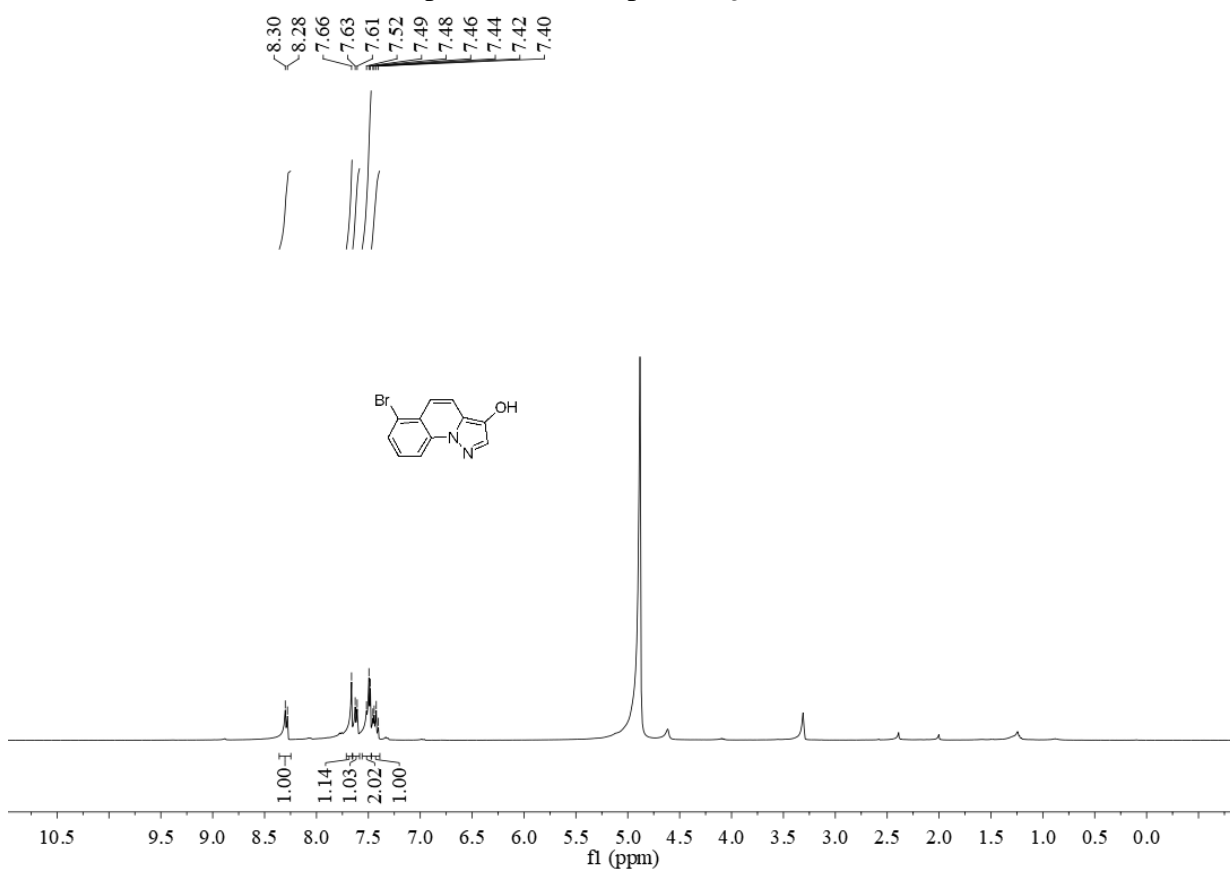

<sup>13</sup>C NMR (100 MHz, Methanol-D<sub>4</sub>) spectrum of compound **5j**

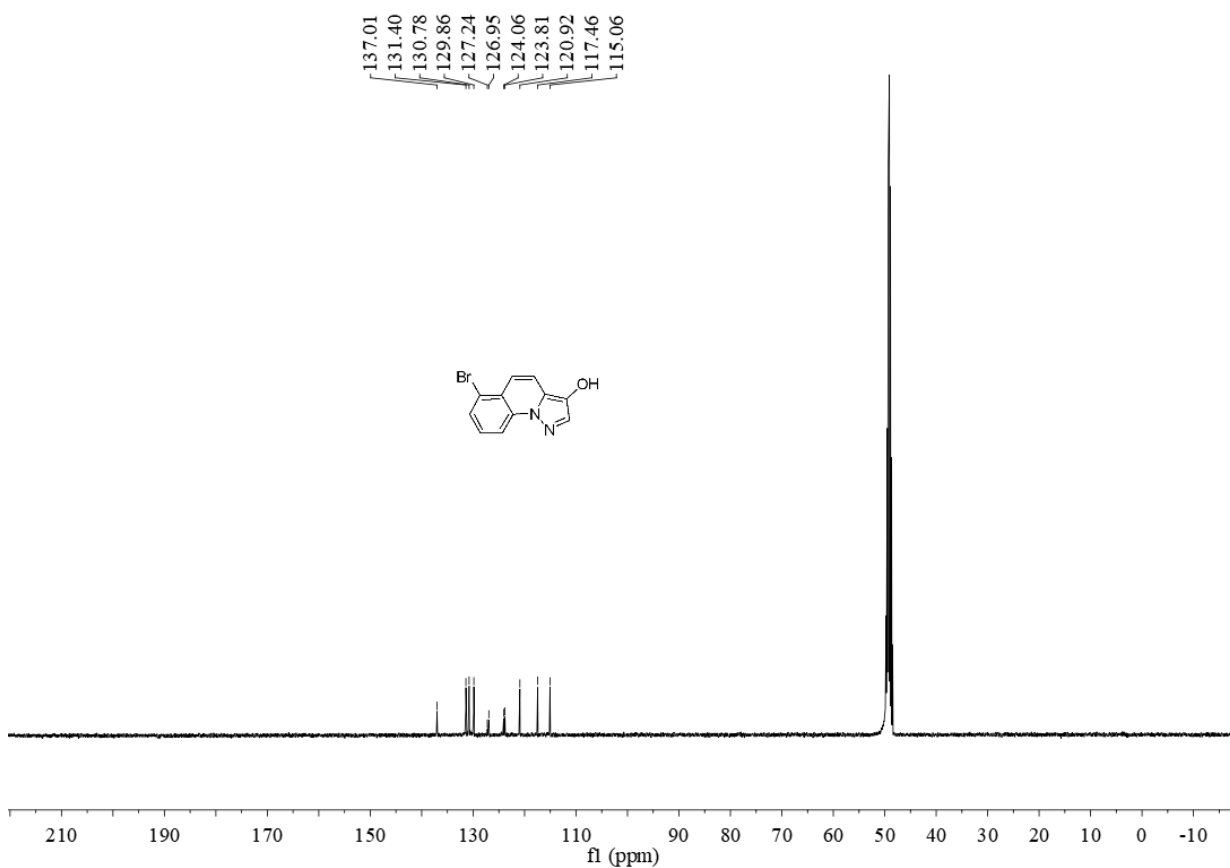

<sup>1</sup>H NMR (400 MHz, Acetone-D<sub>6</sub>) spectrum of compound **7a**

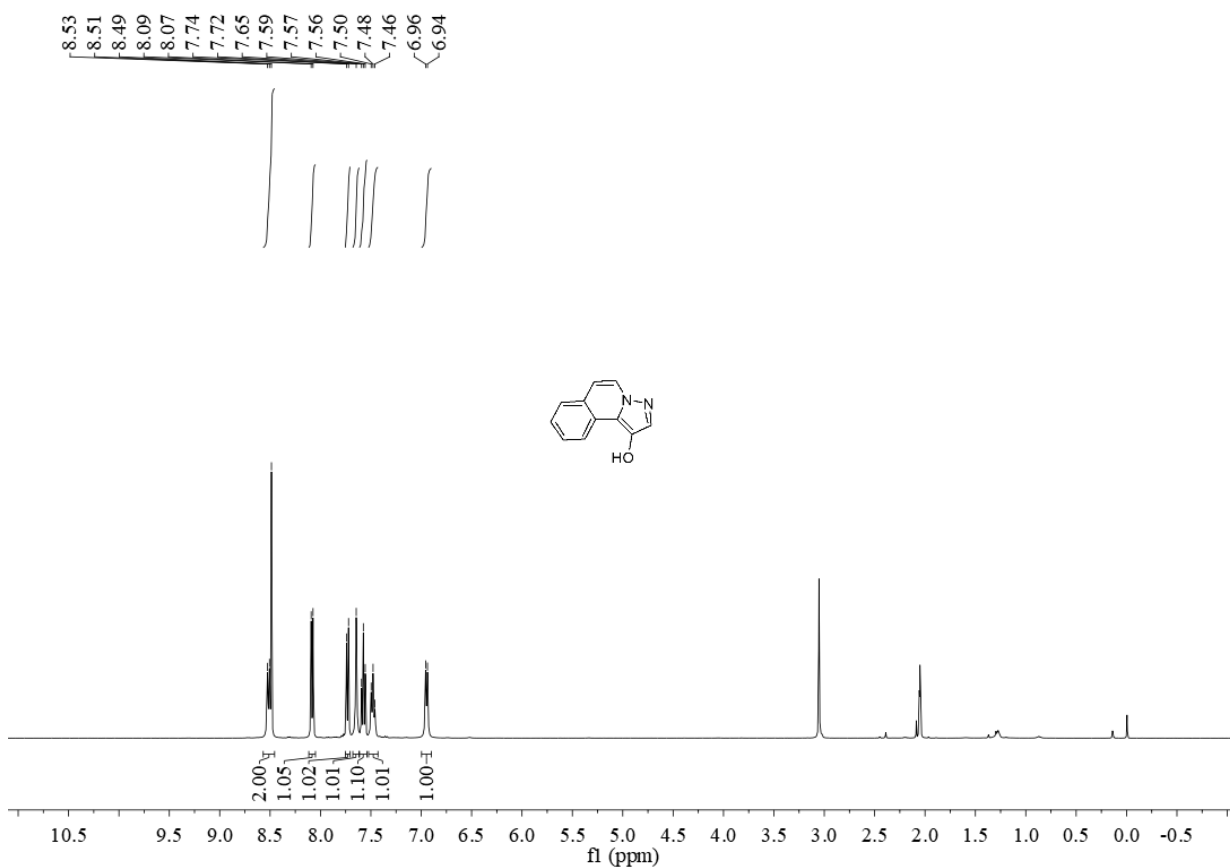

<sup>13</sup>C NMR (100 MHz, Acetone-D<sub>6</sub>) spectrum of compound **7a**

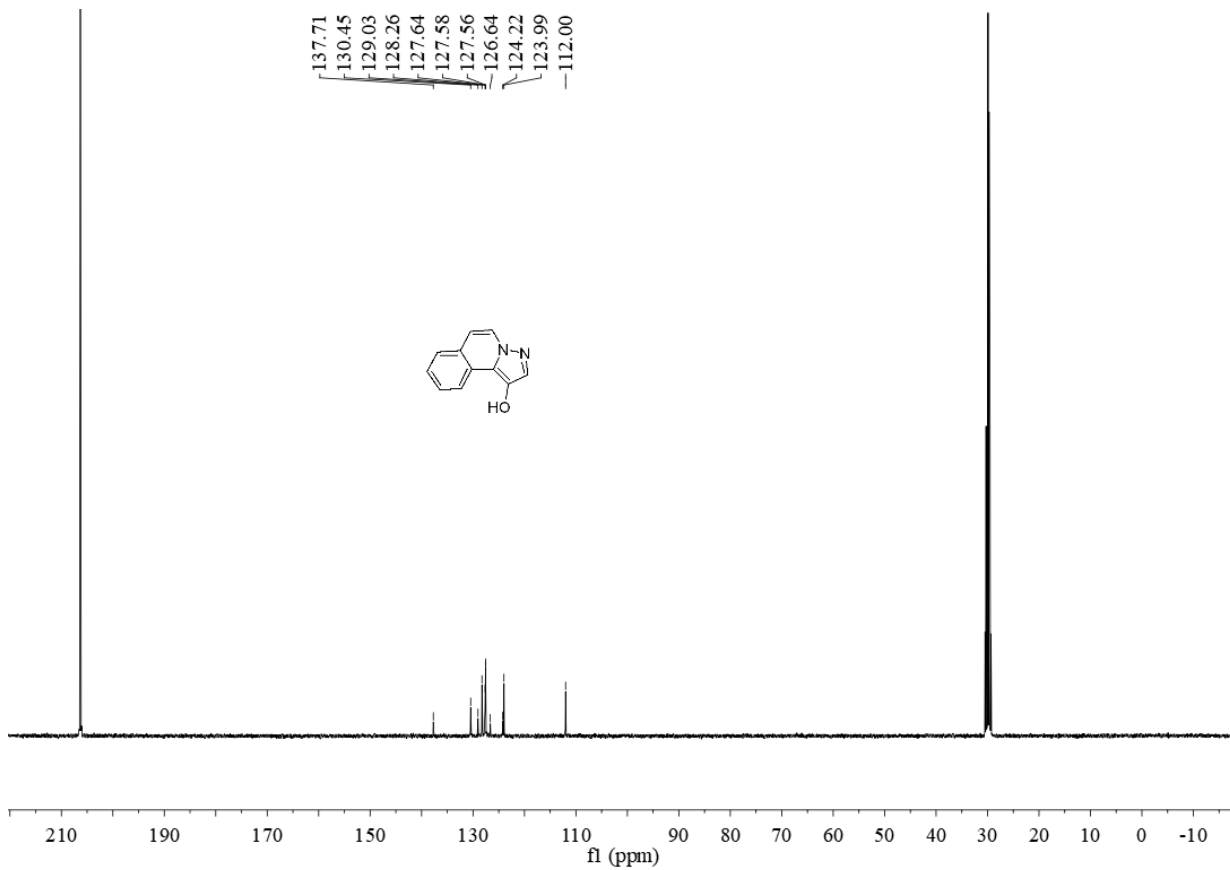

<sup>1</sup>H NMR (400 MHz, Methanol-D4) spectrum of compound **7b**

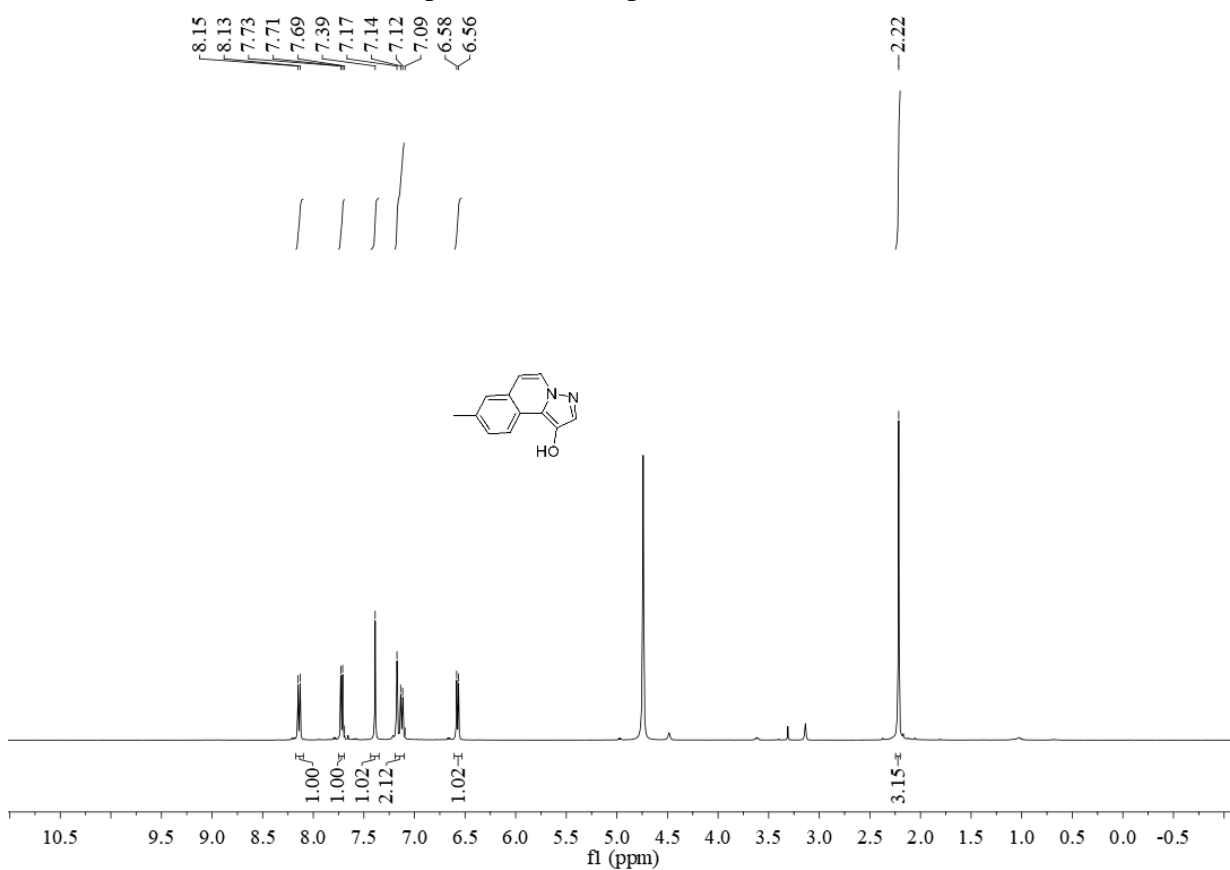

<sup>13</sup>C NMR (100 MHz, Methanol-D4) spectrum of compound **7b**

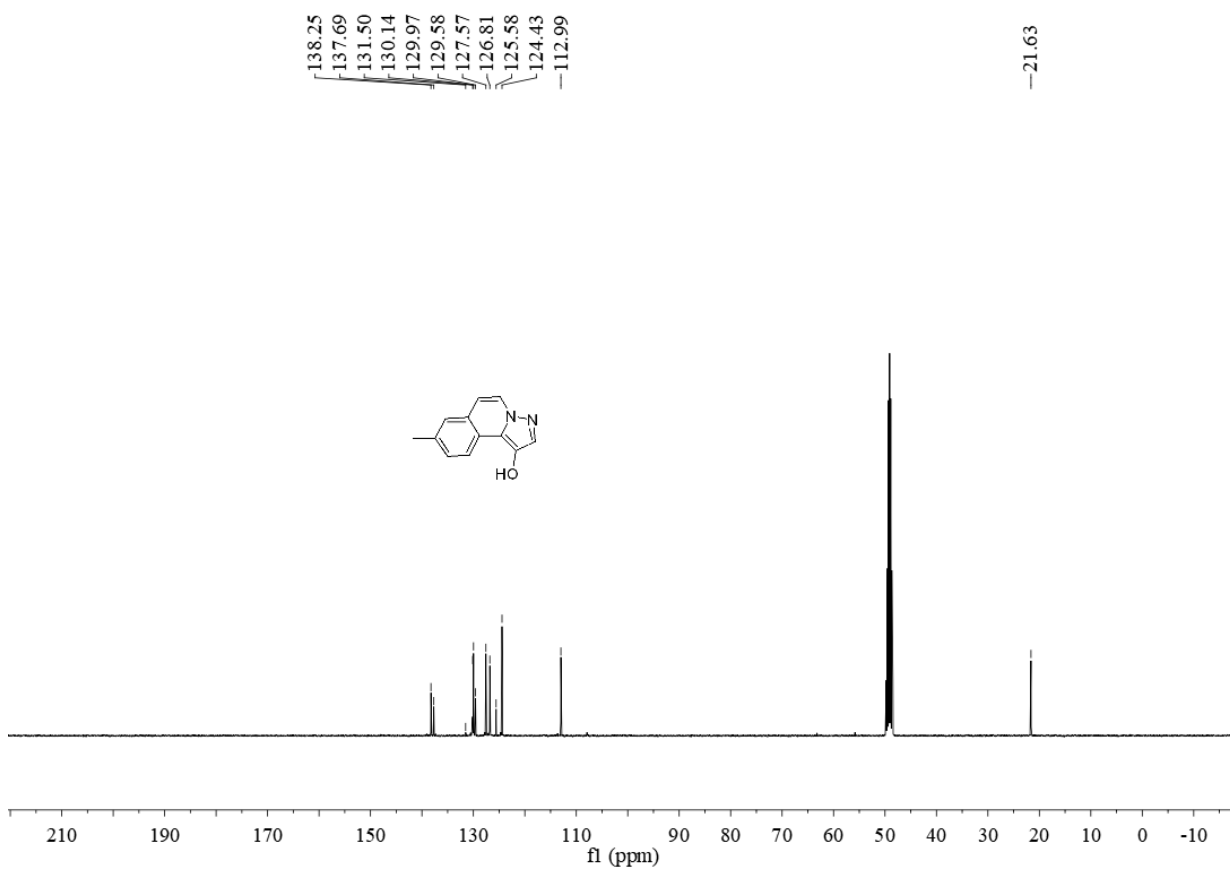

<sup>1</sup>H NMR (400 MHz, Acetone-D<sub>6</sub>) spectrum of compound **7c**

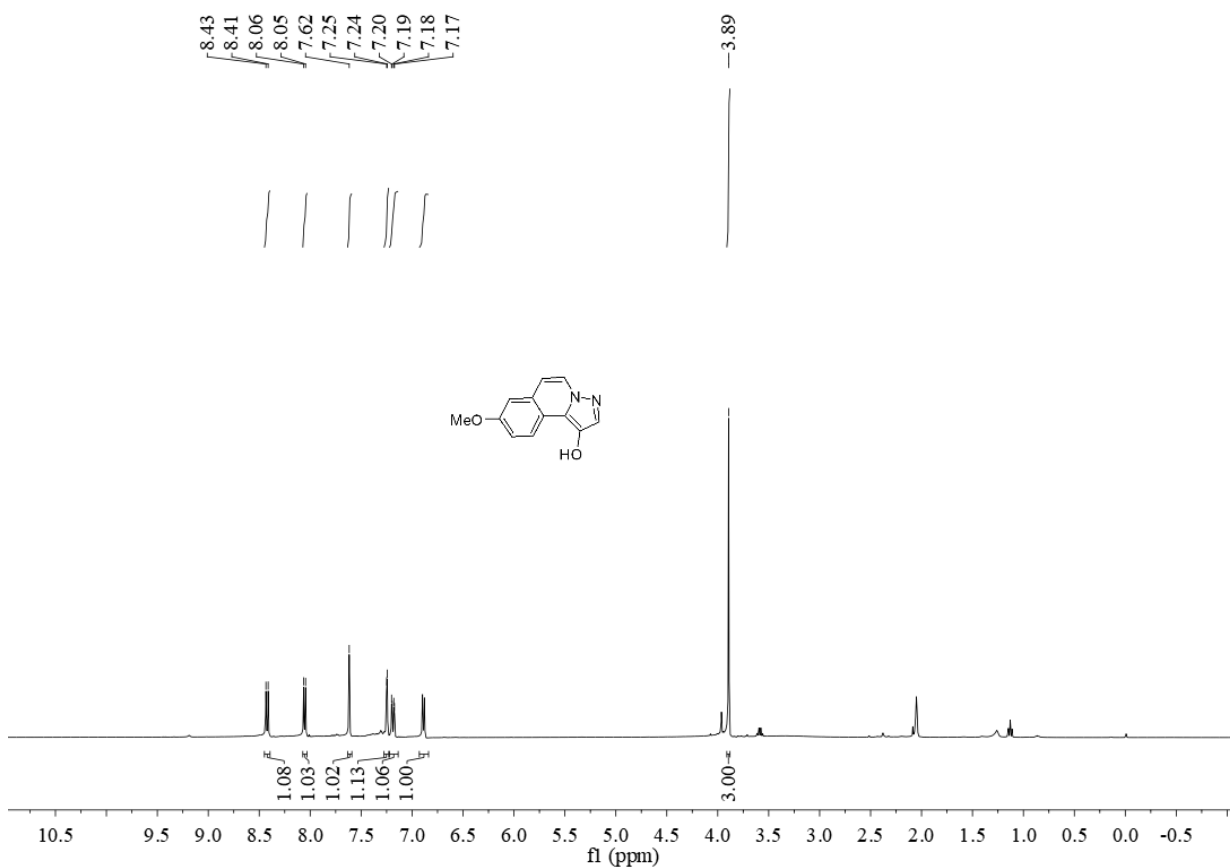

<sup>13</sup>C NMR (100 MHz, Acetone-D<sub>6</sub>) spectrum of compound **7c**

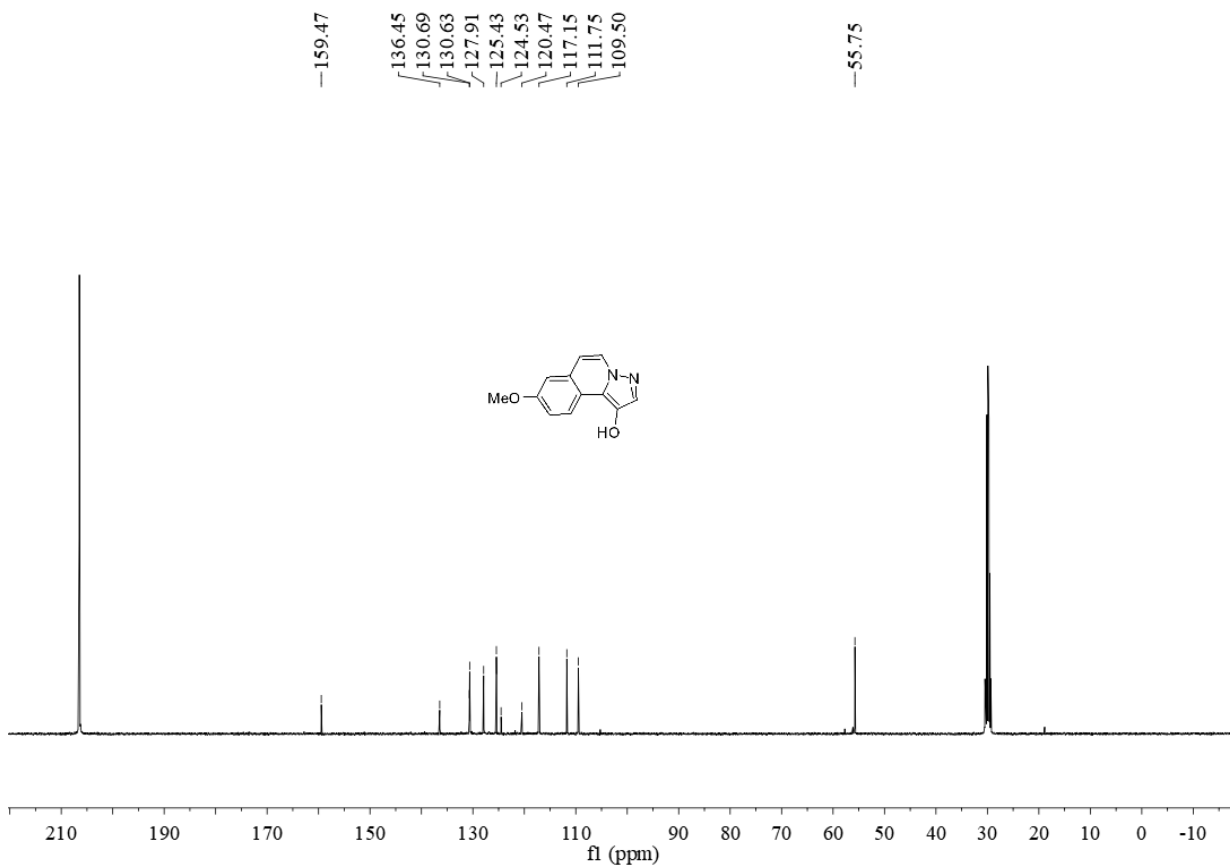



<sup>1</sup>H NMR (400 MHz, Acetone-D6) spectrum of compound **7d**

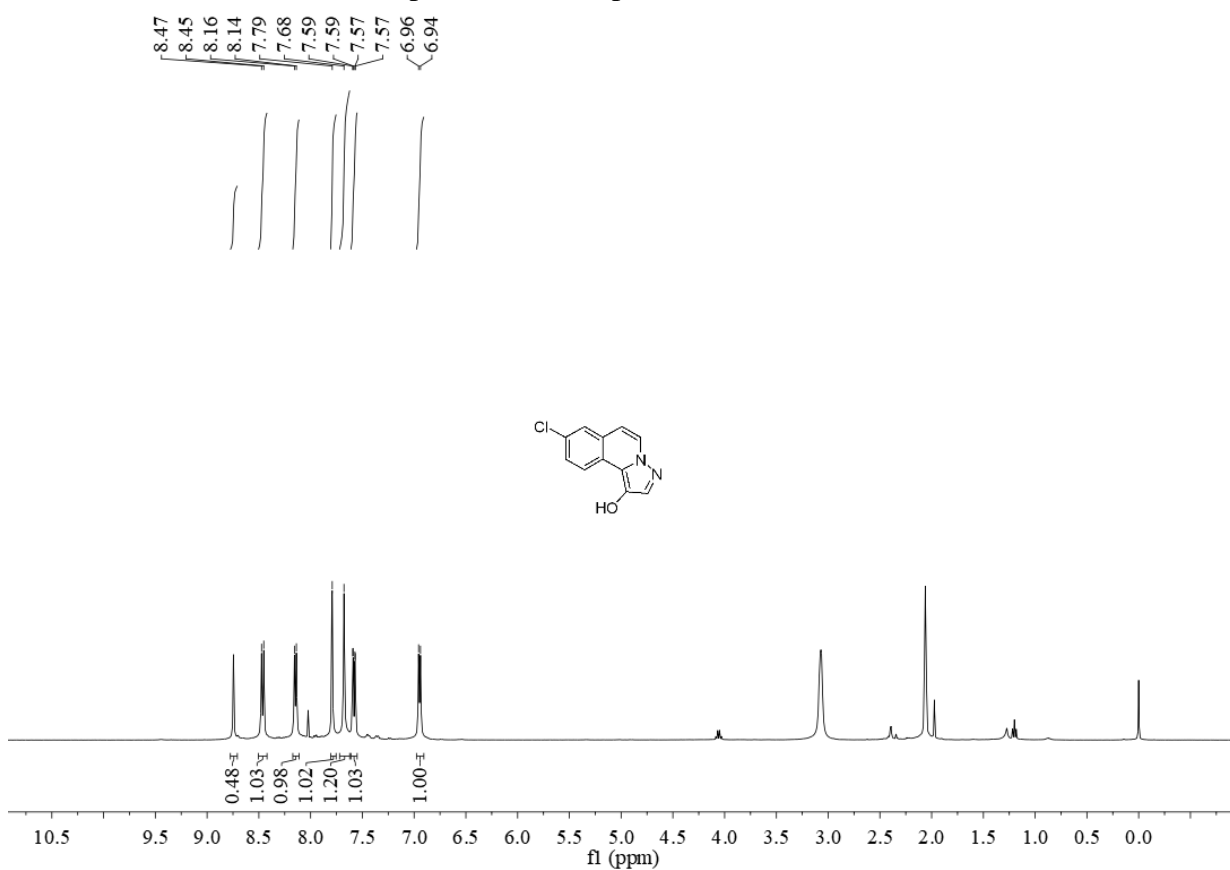

<sup>13</sup>C NMR (100 MHz, Acetone-D6) spectrum of compound **7d**

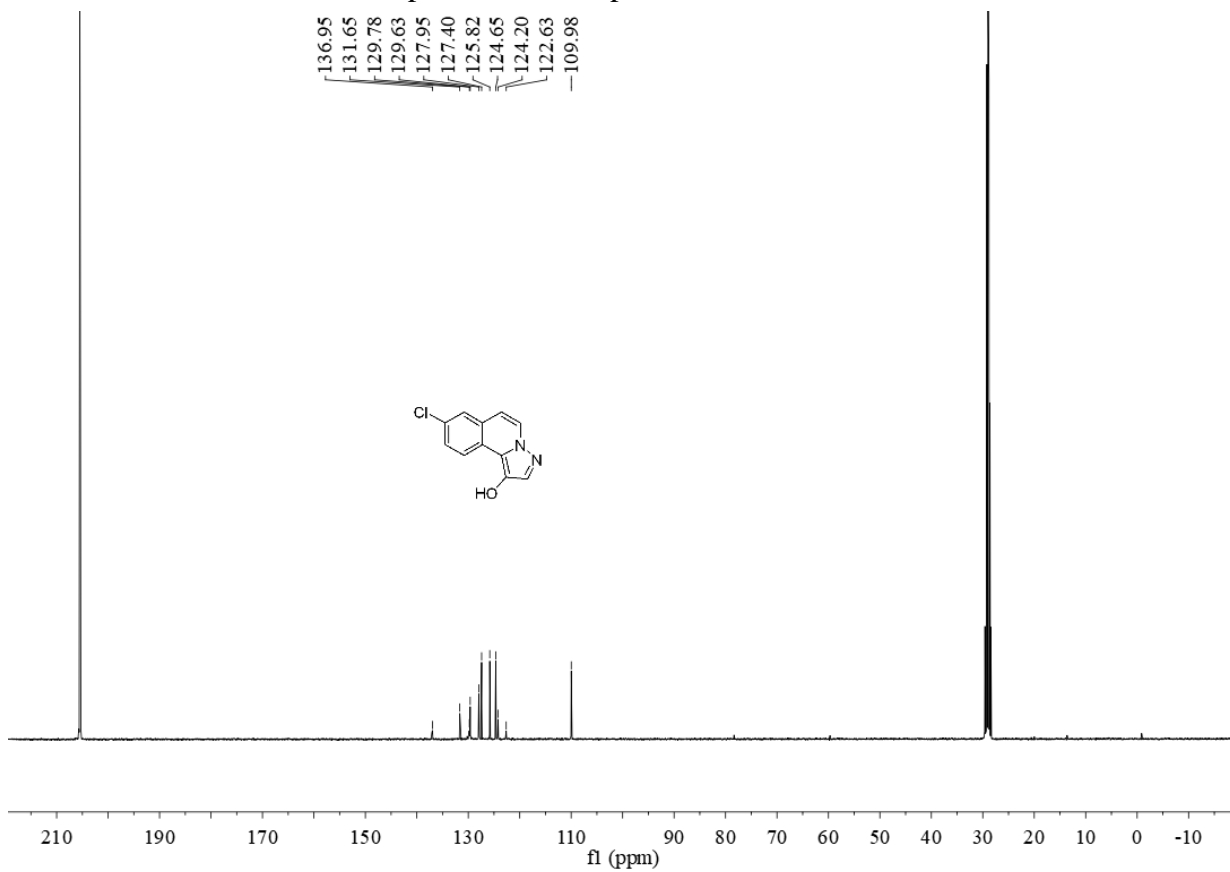

<sup>1</sup>H NMR (400 MHz, Acetone-D<sub>6</sub>) spectrum of compound **7e**

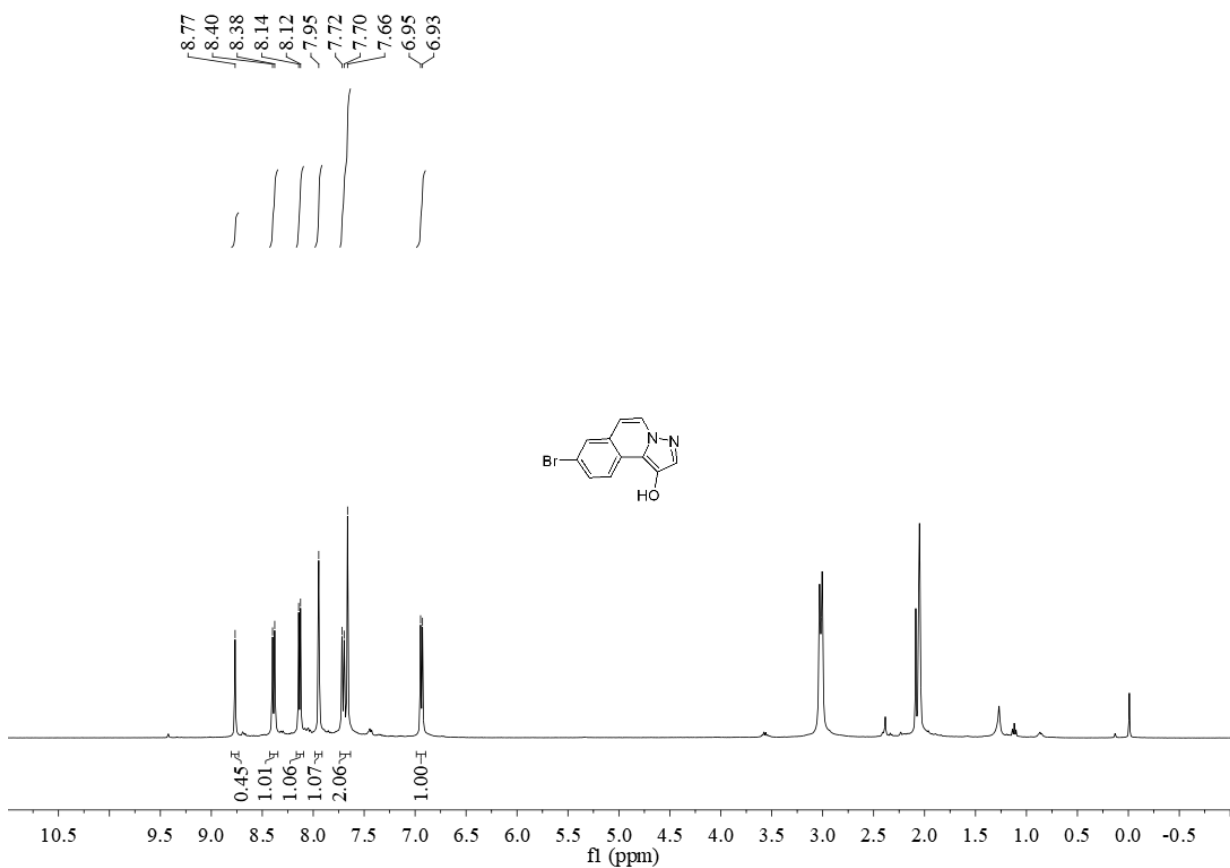

<sup>13</sup>C NMR (100 MHz, Acetone-D<sub>6</sub>) spectrum of compound **7e**

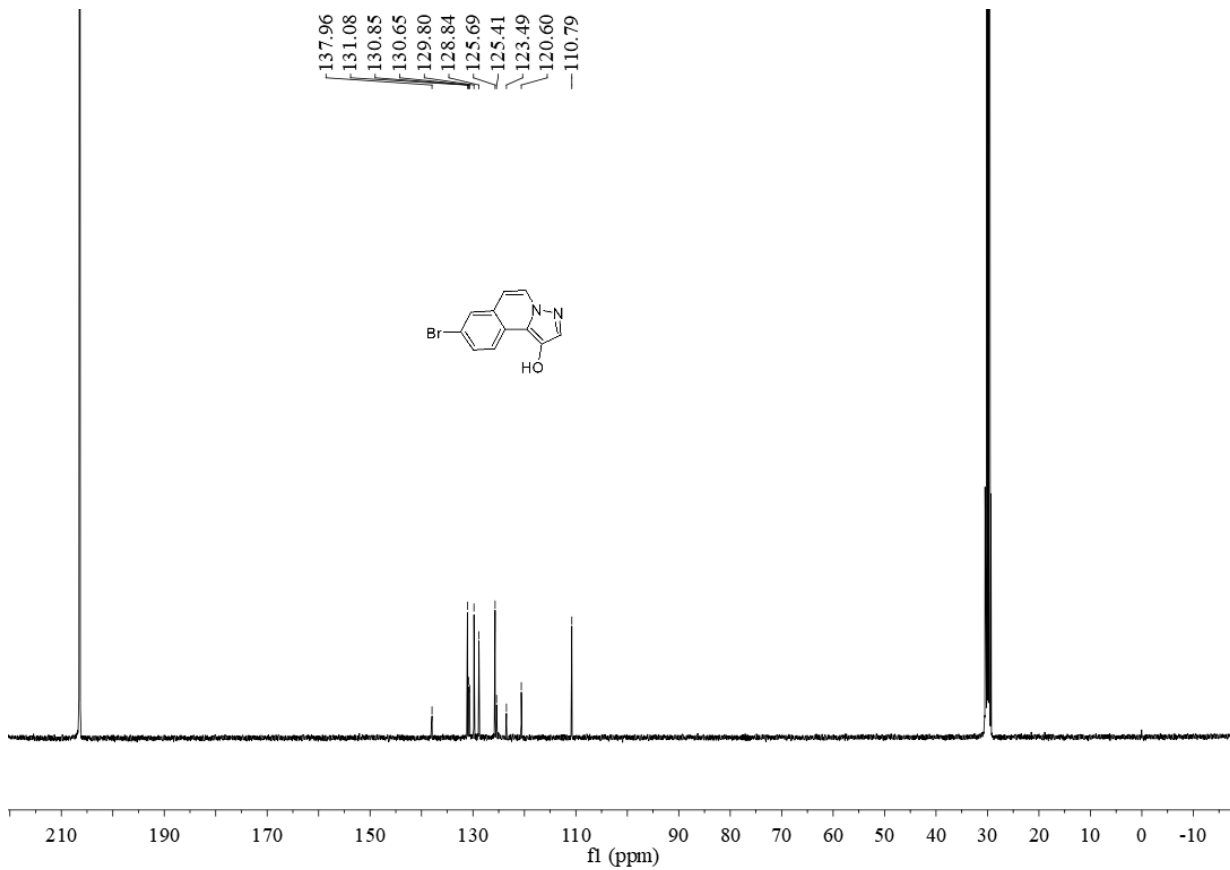

$^1\text{H}$  NMR (400 MHz, Acetone- $\text{D}_6$ ) spectrum of compound **7f**

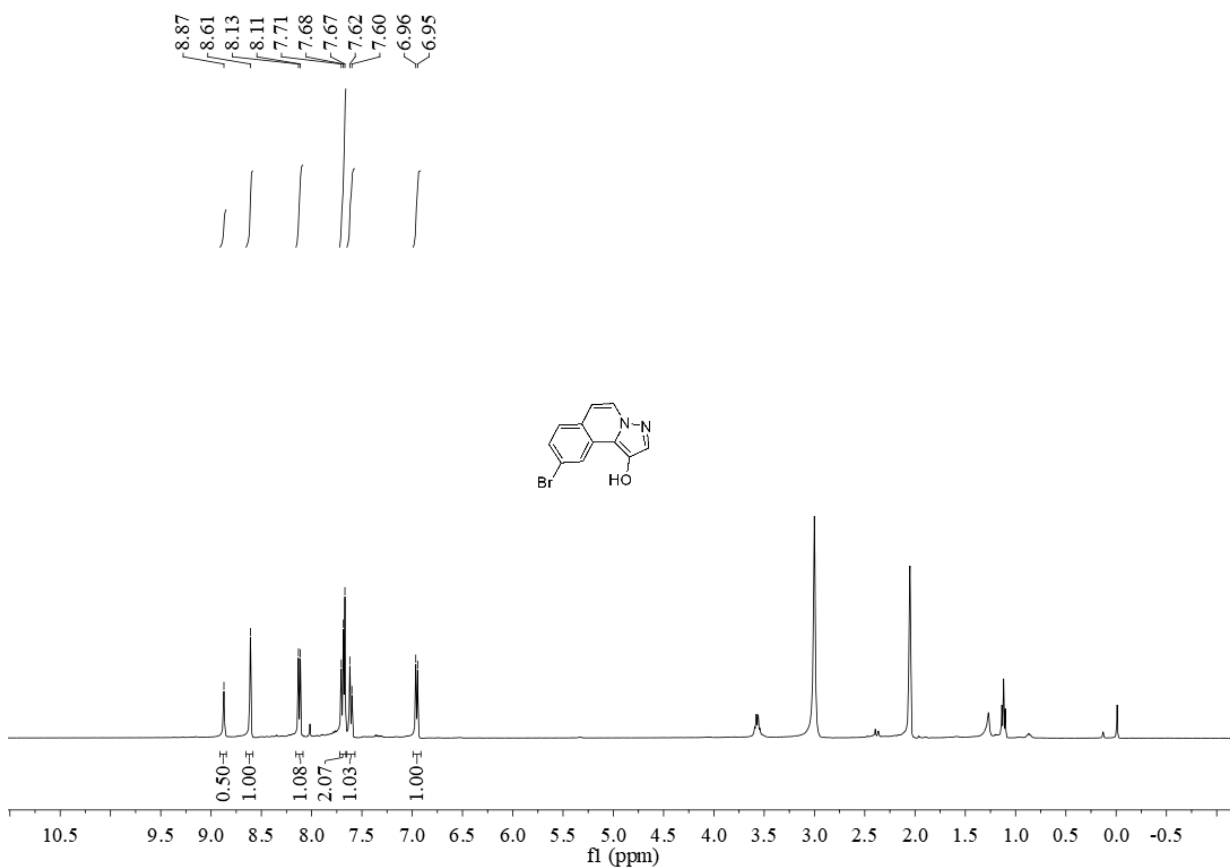

$^{13}\text{C}$  NMR (100 MHz, Acetone- $\text{D}_6$ ) spectrum of compound **7f**

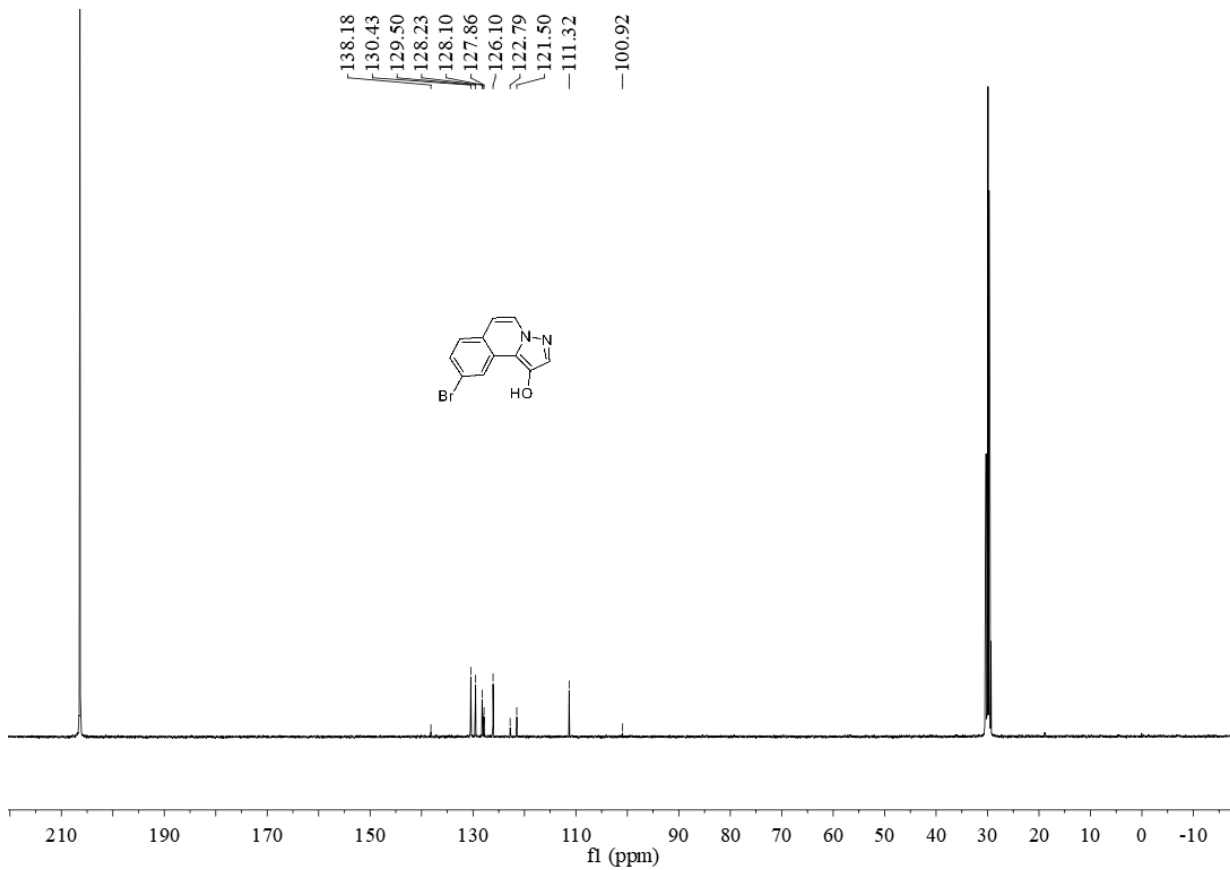

<sup>1</sup>H NMR (400 MHz, Methanol-D4) spectrum of compound **7g**

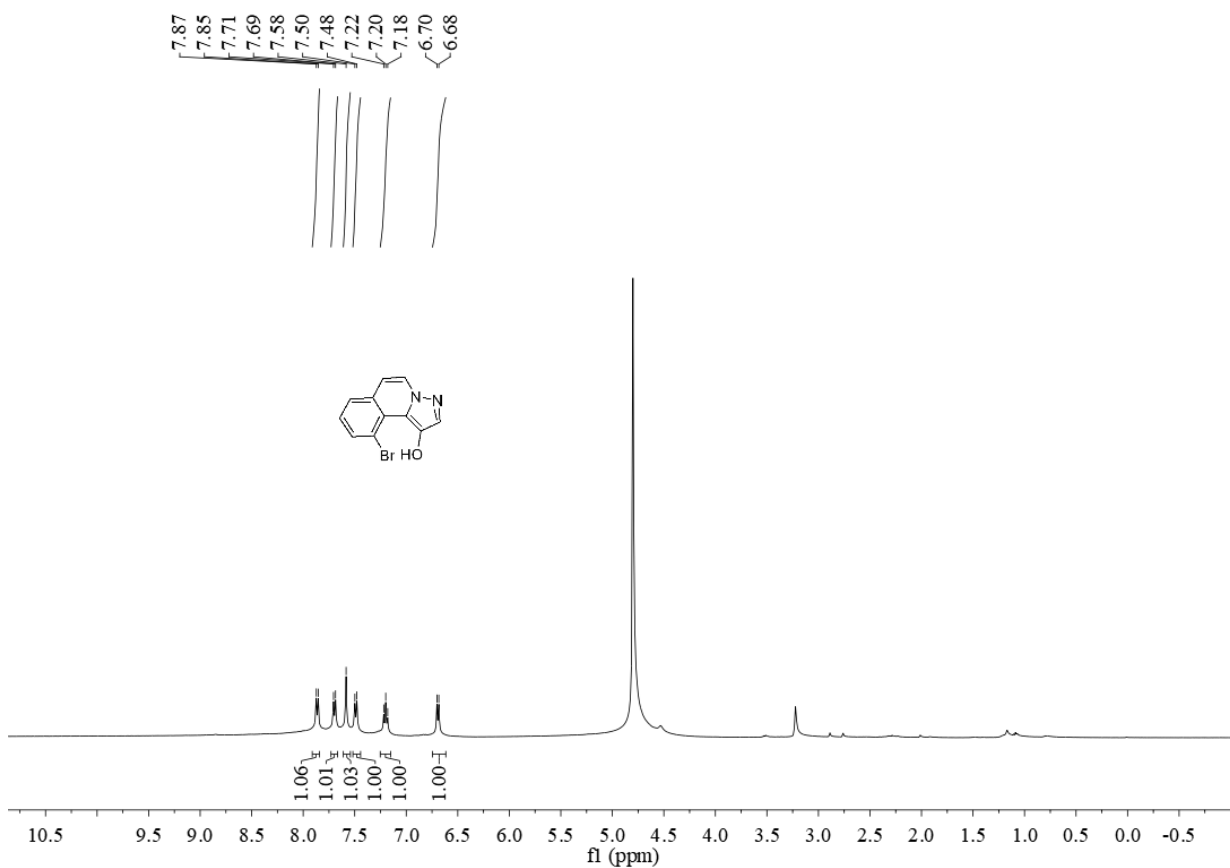

<sup>13</sup>C NMR (400 MHz, Methanol-D4) spectrum of compound **7g**

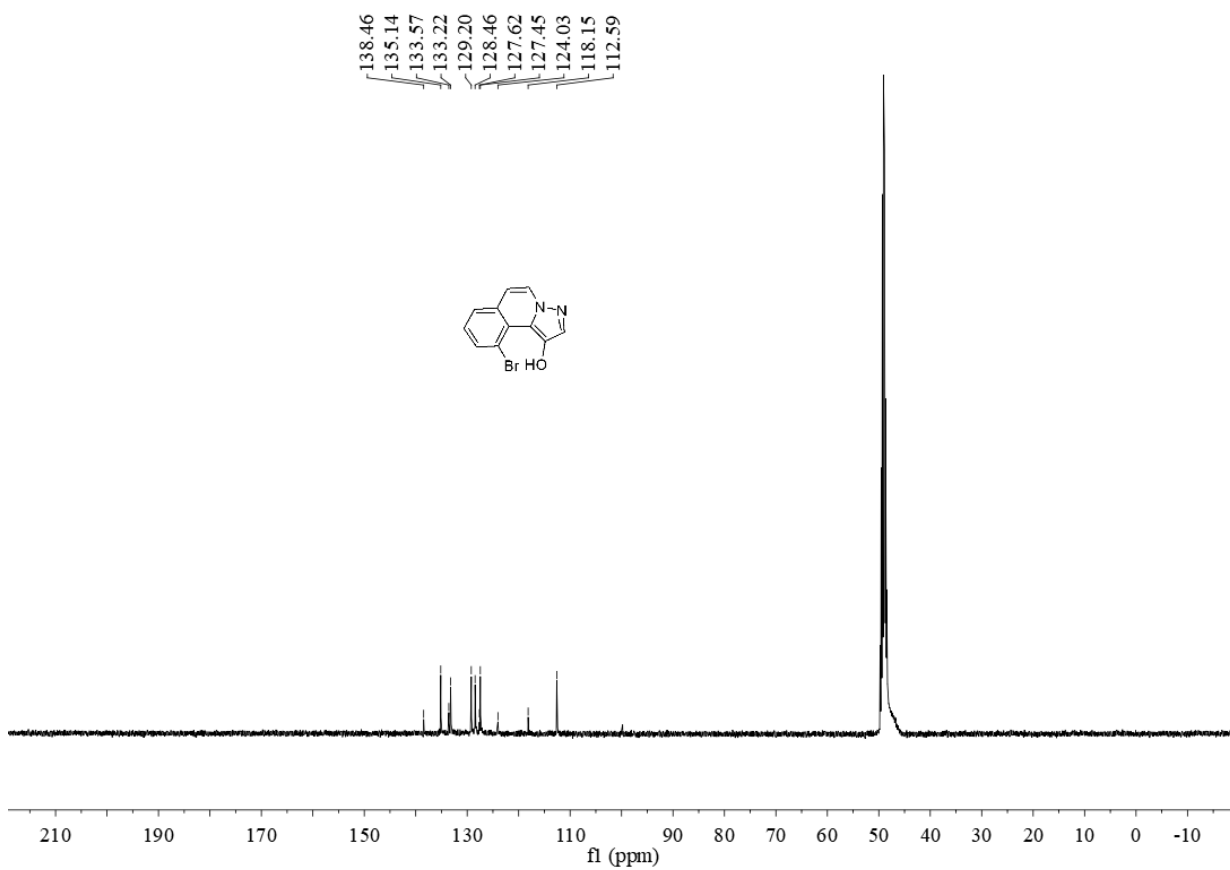

<sup>1</sup>H NMR (400 MHz, Acetone-D6) spectrum of compound **7h**

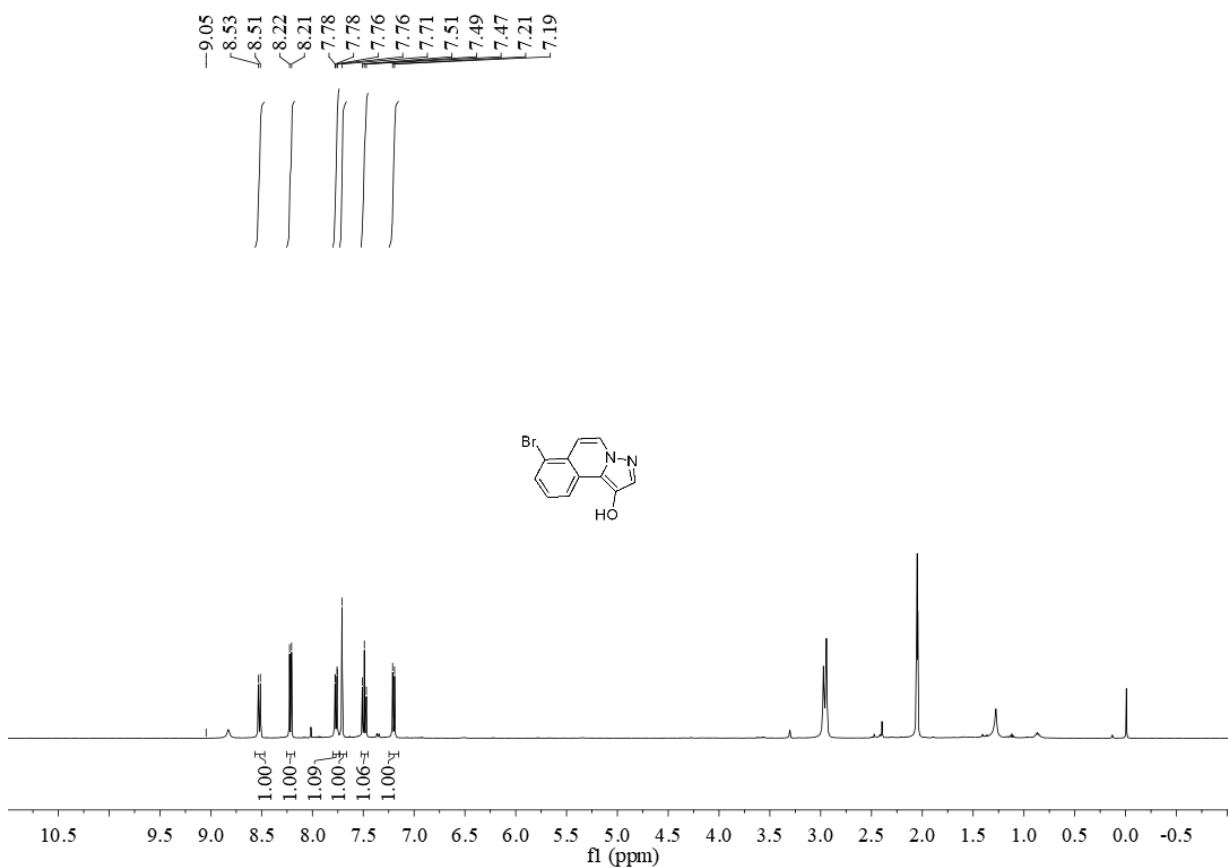

<sup>13</sup>C NMR (100 MHz, Acetone-D6) spectrum of compound **7h**

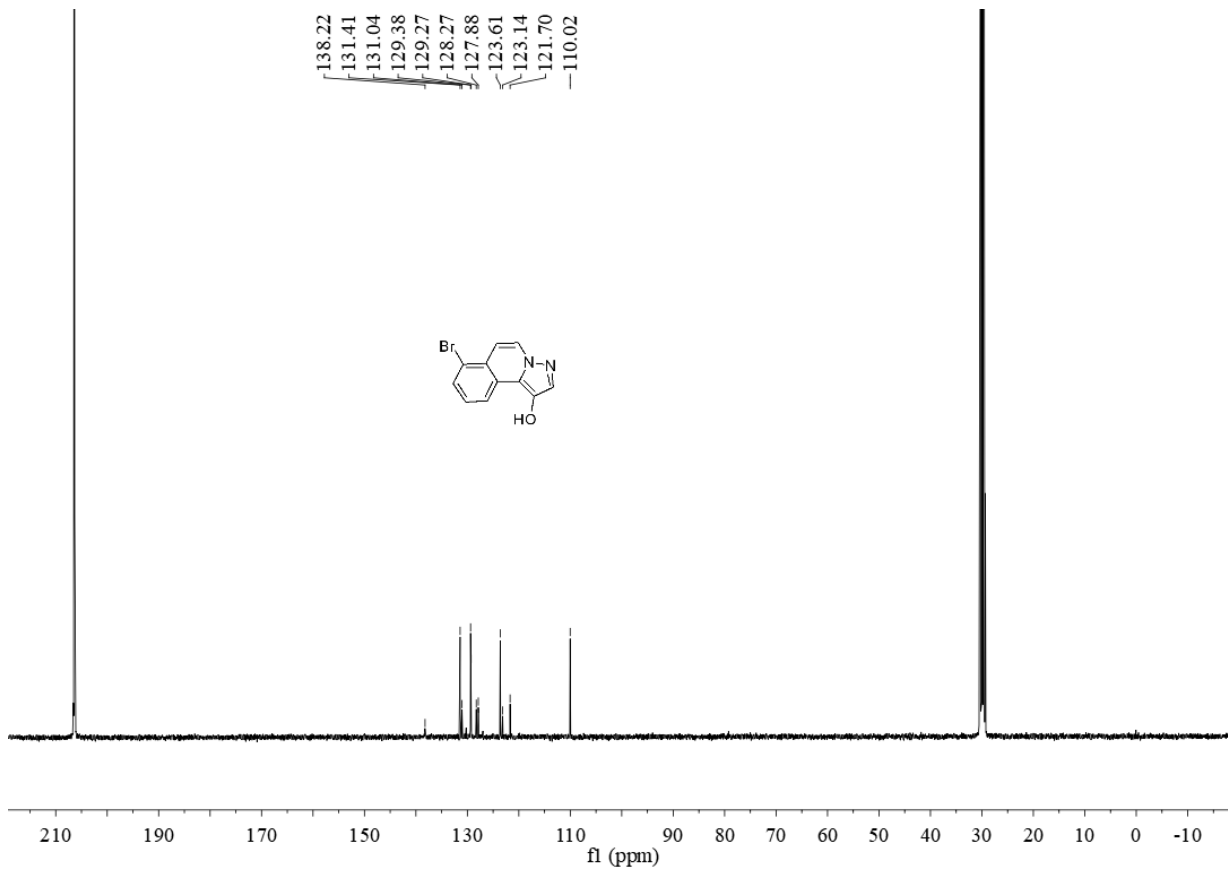

<sup>1</sup>H NMR (400 MHz, CDCl<sub>3</sub>) spectrum of compound **8a**

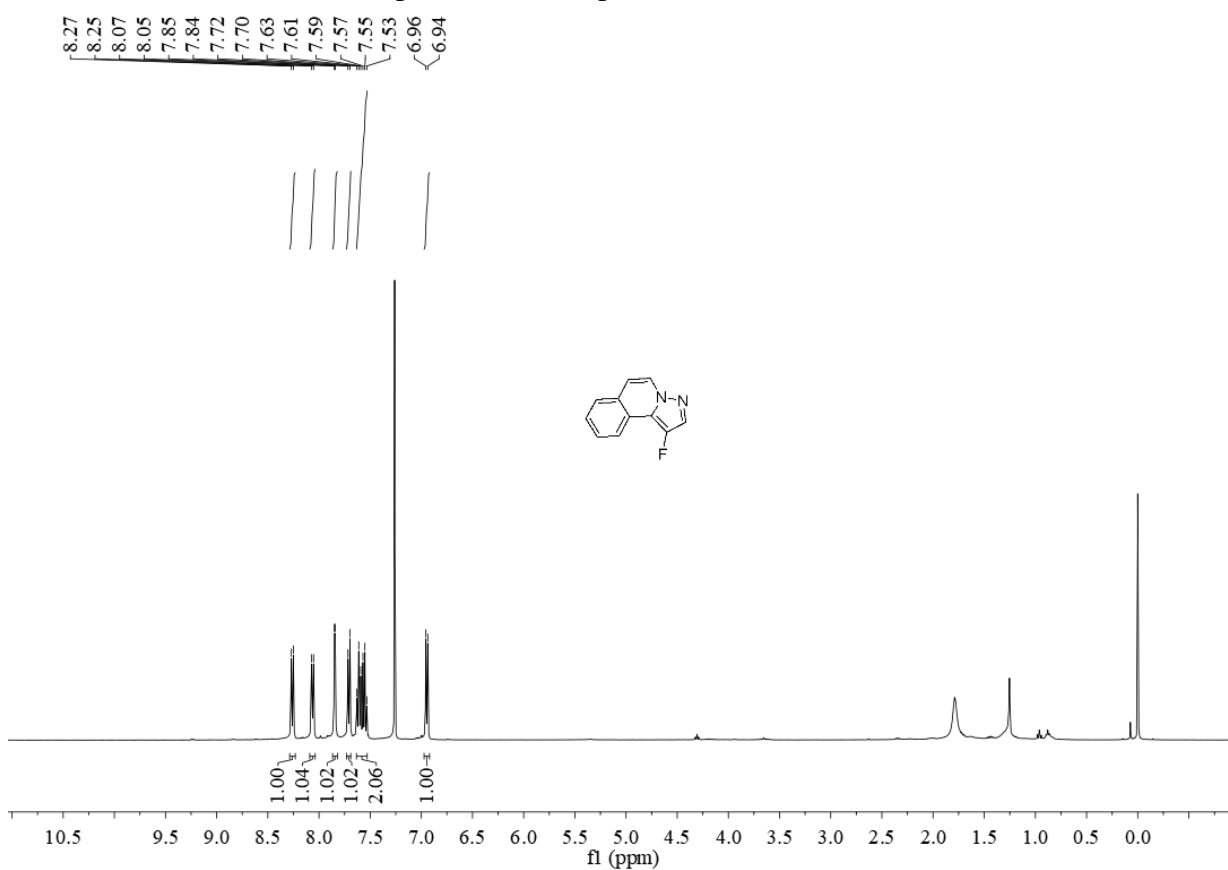

<sup>13</sup>C NMR (100 MHz, CDCl<sub>3</sub>) spectrum of compound **8a**

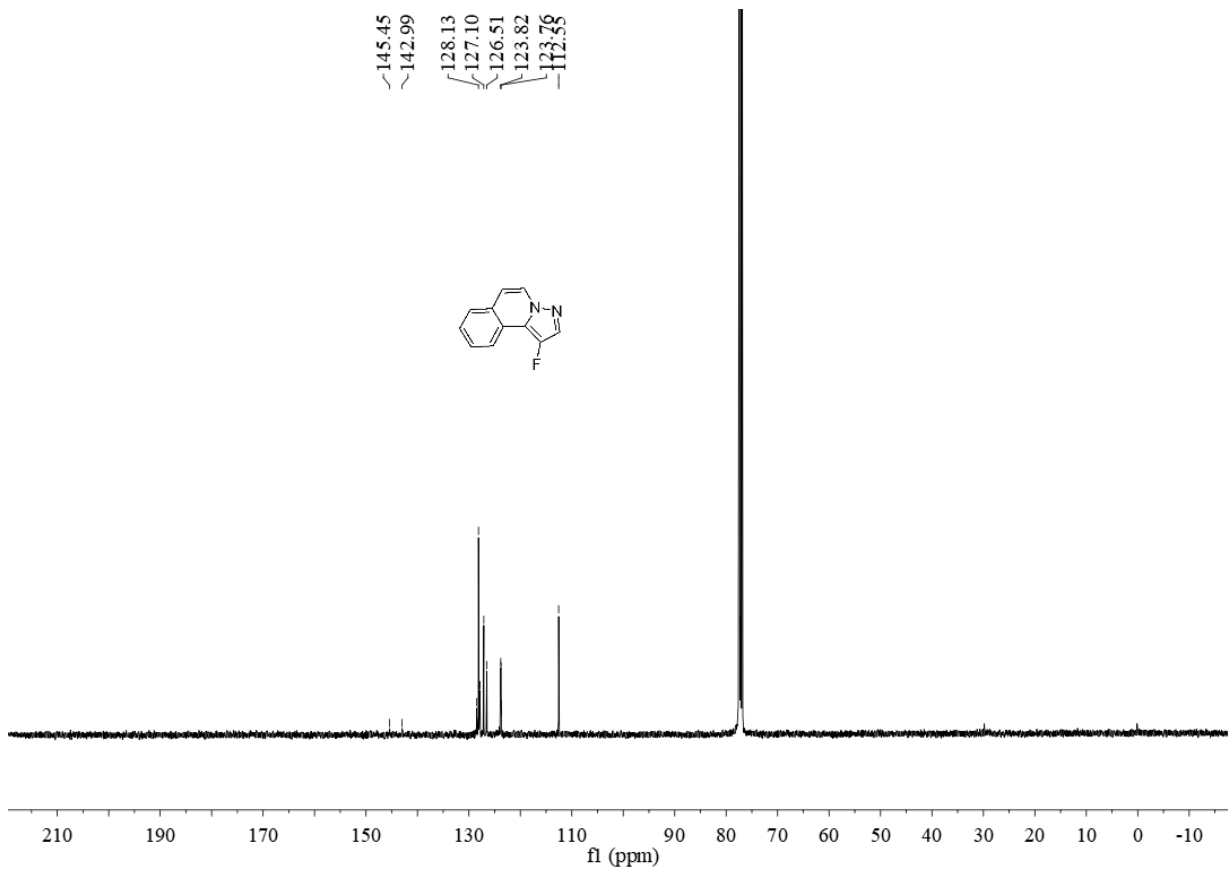

$^{19}\text{F}$  NMR (376 MHz,  $\text{CDCl}_3$ ) spectrum of compound **8a**

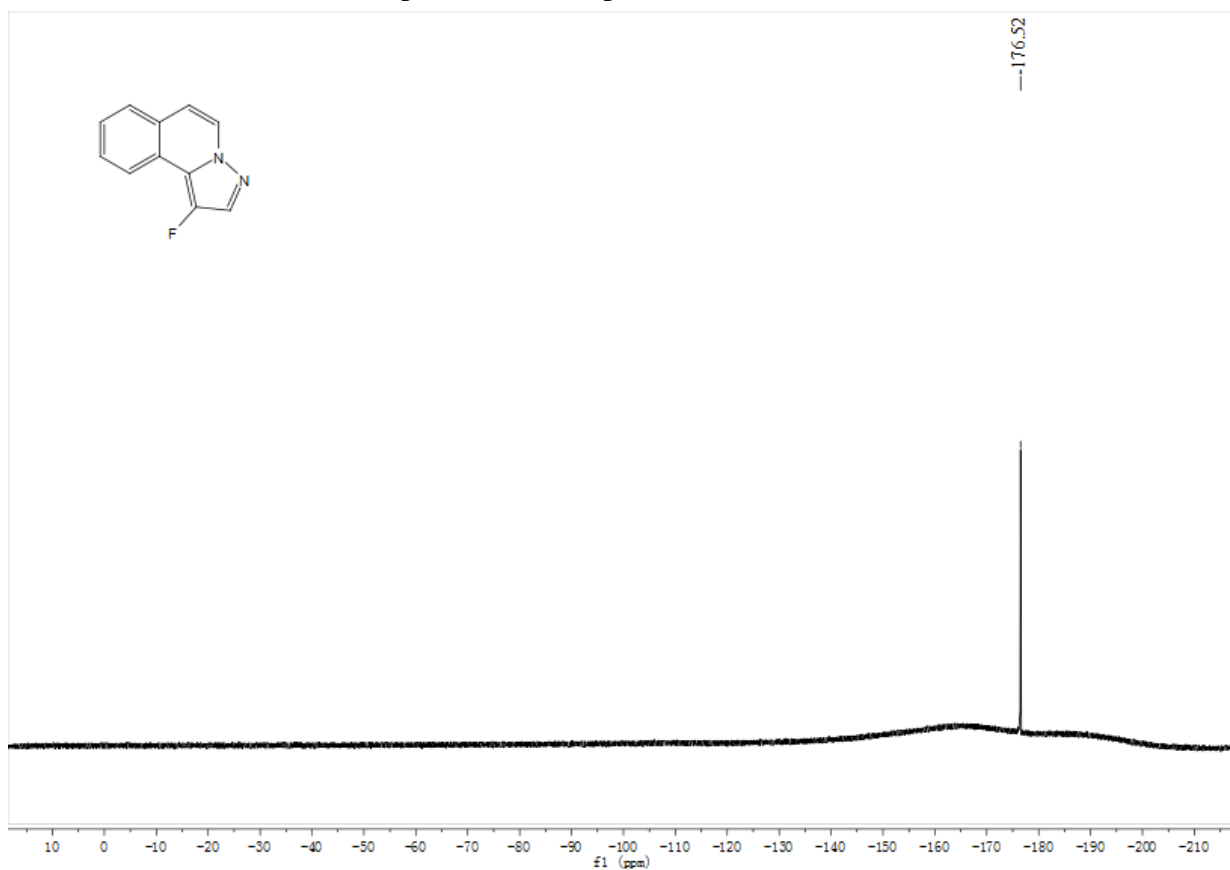

<sup>1</sup>H NMR (400 MHz, CDCl<sub>3</sub>) spectrum of compound **8b**

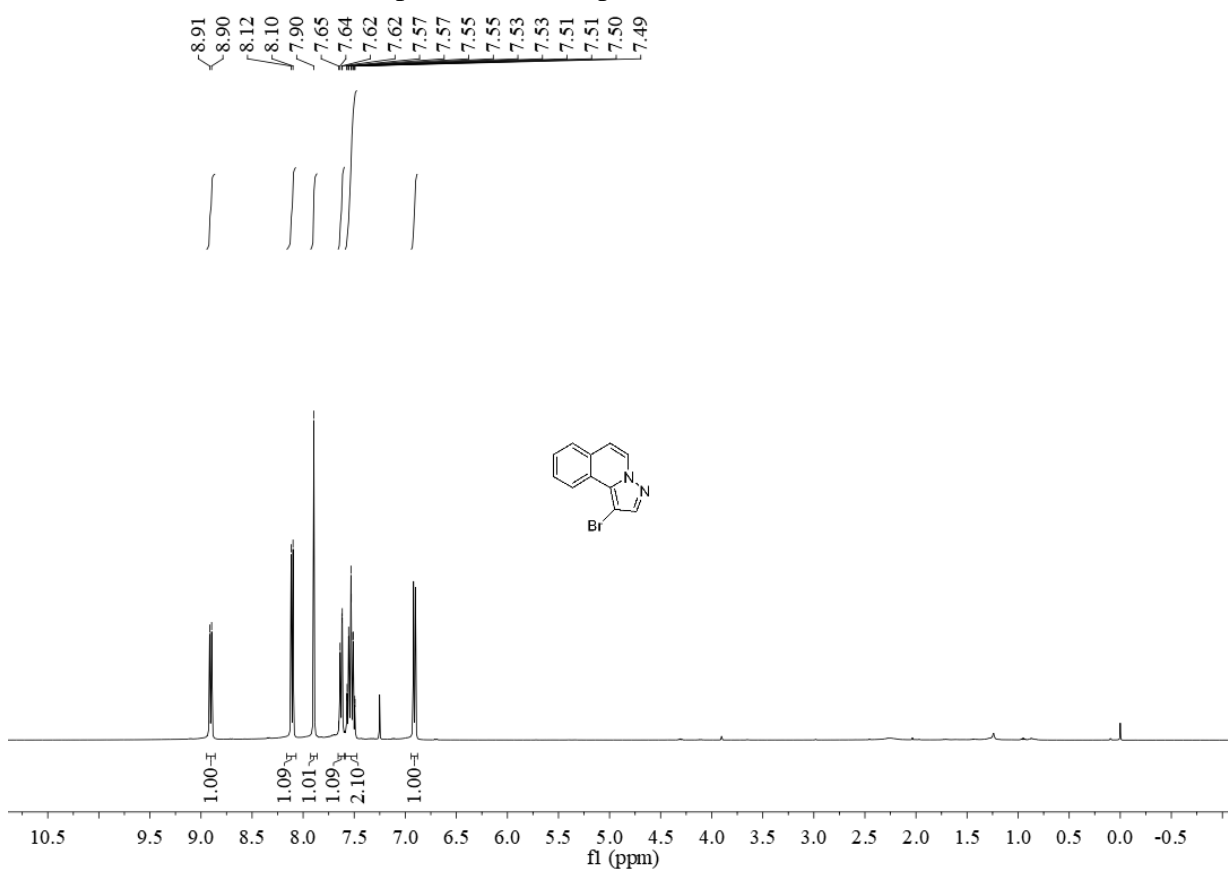

<sup>13</sup>C NMR (100 MHz, CDCl<sub>3</sub>) spectrum of compound **8b**

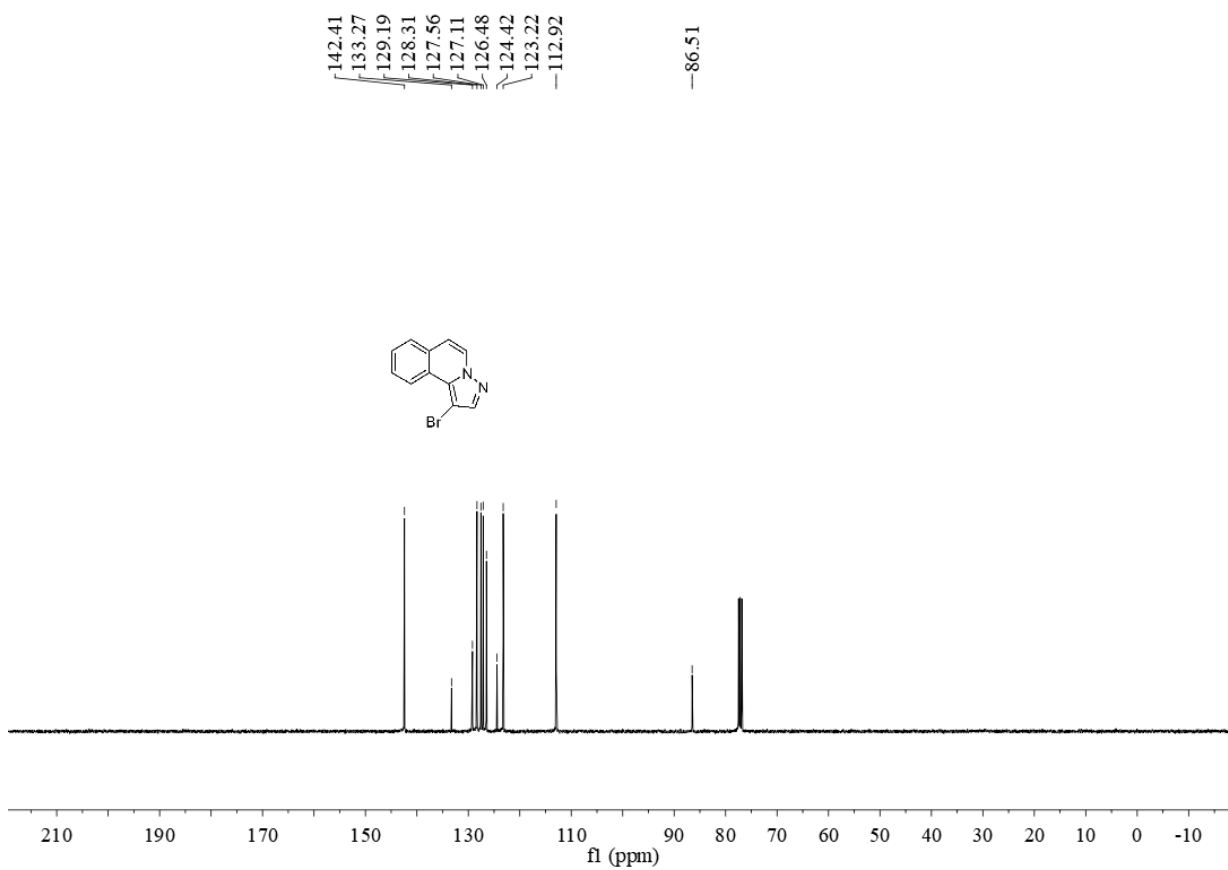



$^1\text{H}$  NMR (400 MHz,  $\text{CDCl}_3$ ) spectrum of compound **8c**

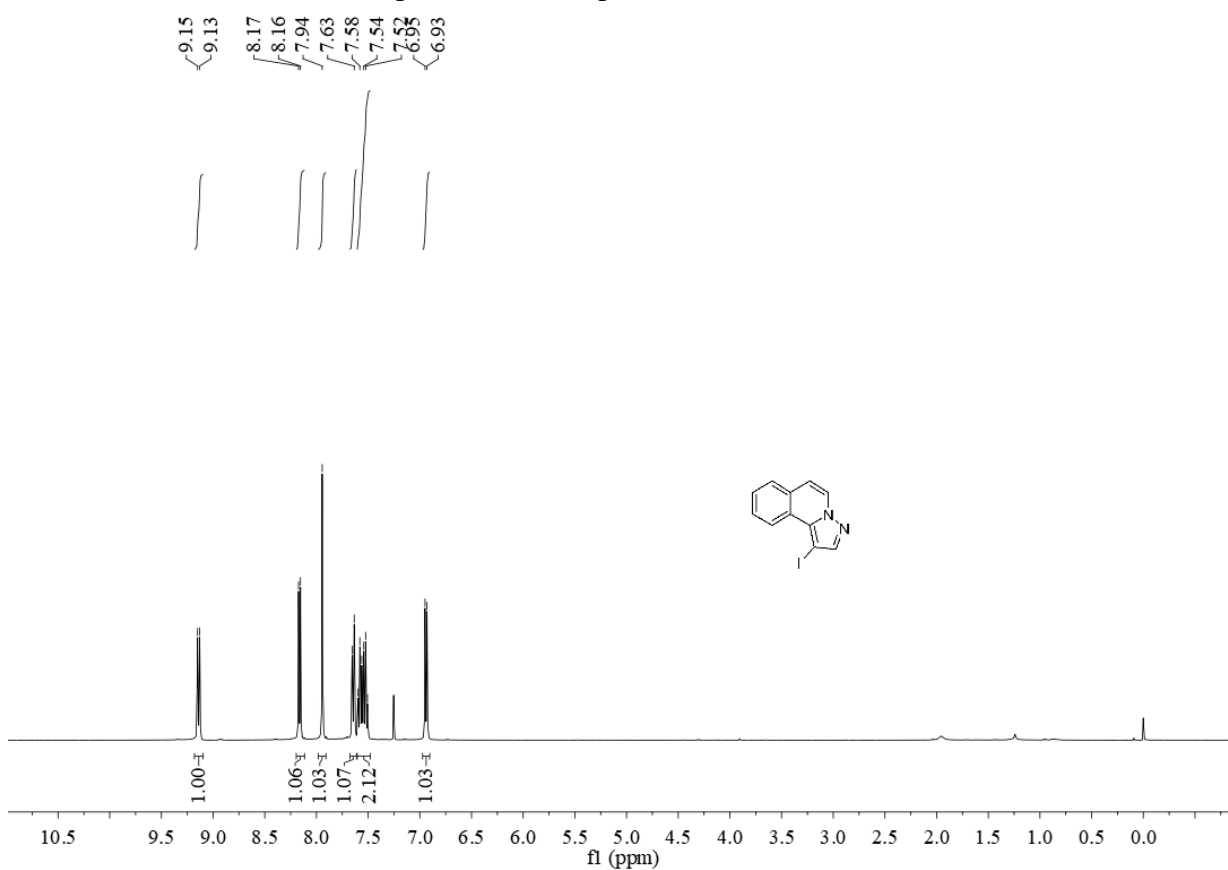

$^{13}\text{C}$  NMR (100 MHz,  $\text{CDCl}_3$ ) spectrum of compound **8c**

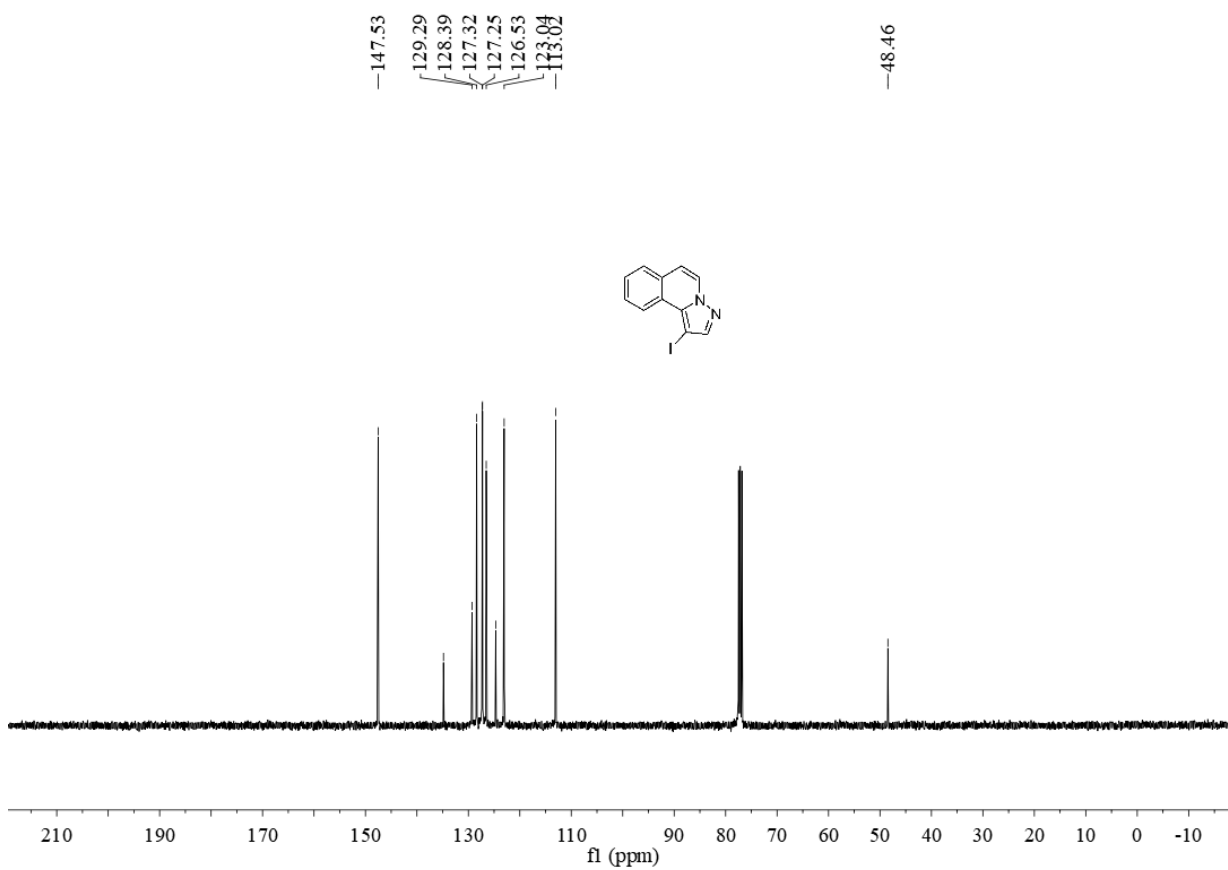

$^1\text{H}$  NMR (400 MHz,  $\text{CDCl}_3$ ) spectrum of compound **8d**

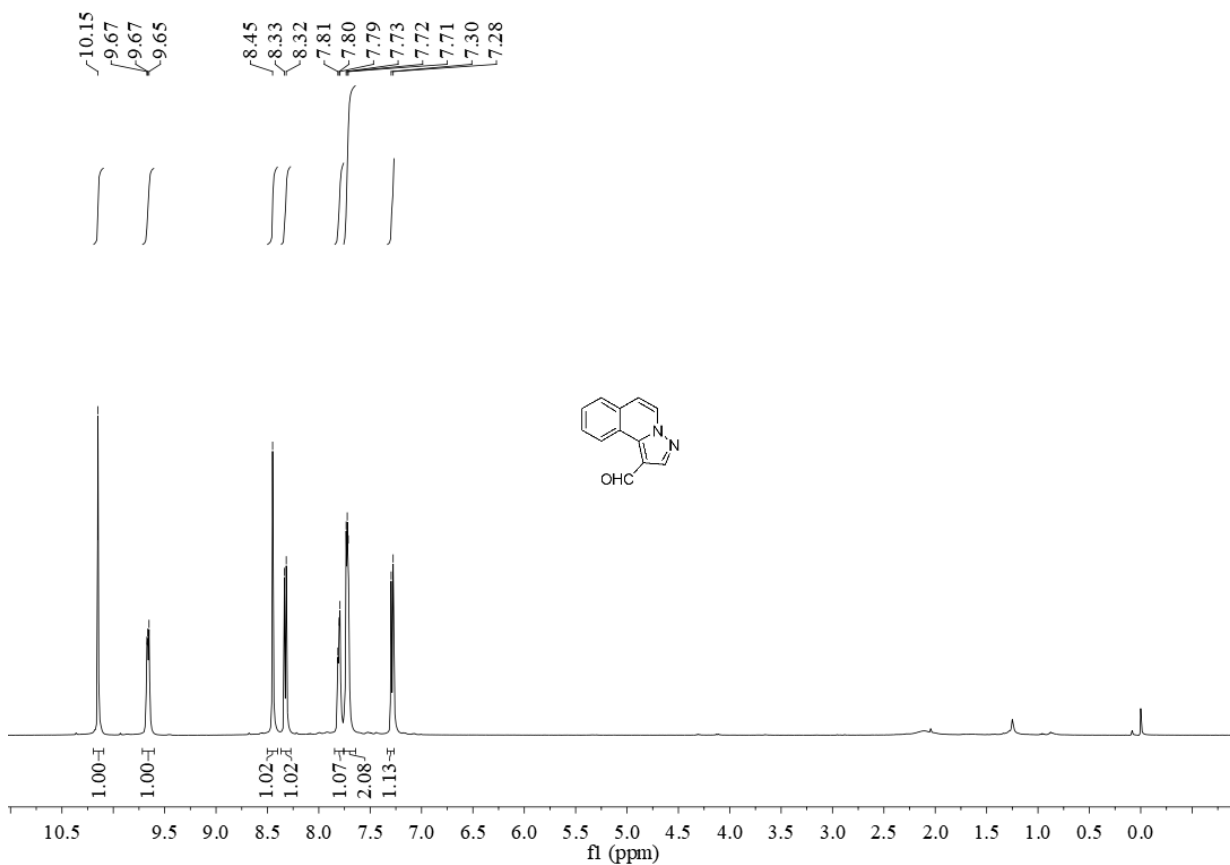

$^{13}\text{C}$  NMR (100 MHz,  $\text{CDCl}_3$ ) spectrum of compound **8d**

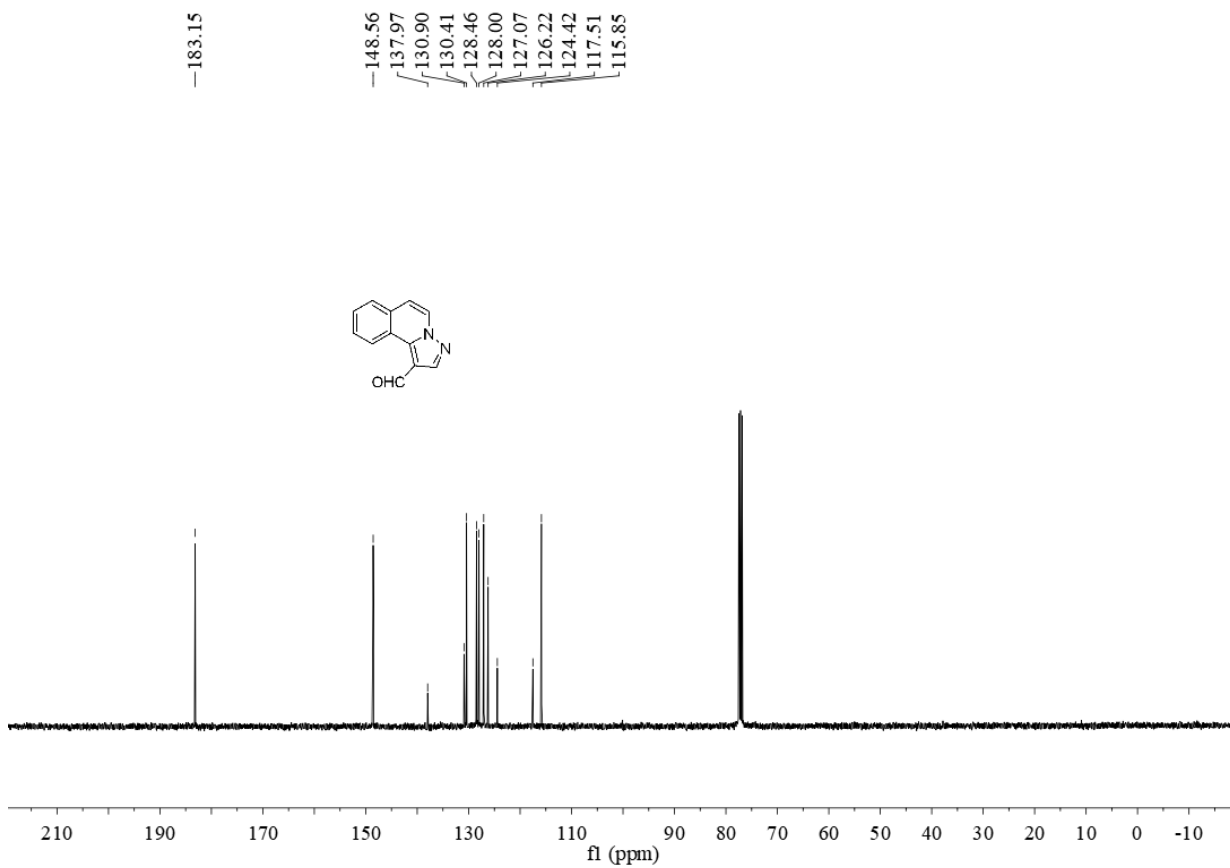

$^1\text{H}$  NMR (400 MHz,  $\text{CDCl}_3$ ) spectrum of compound **8e**

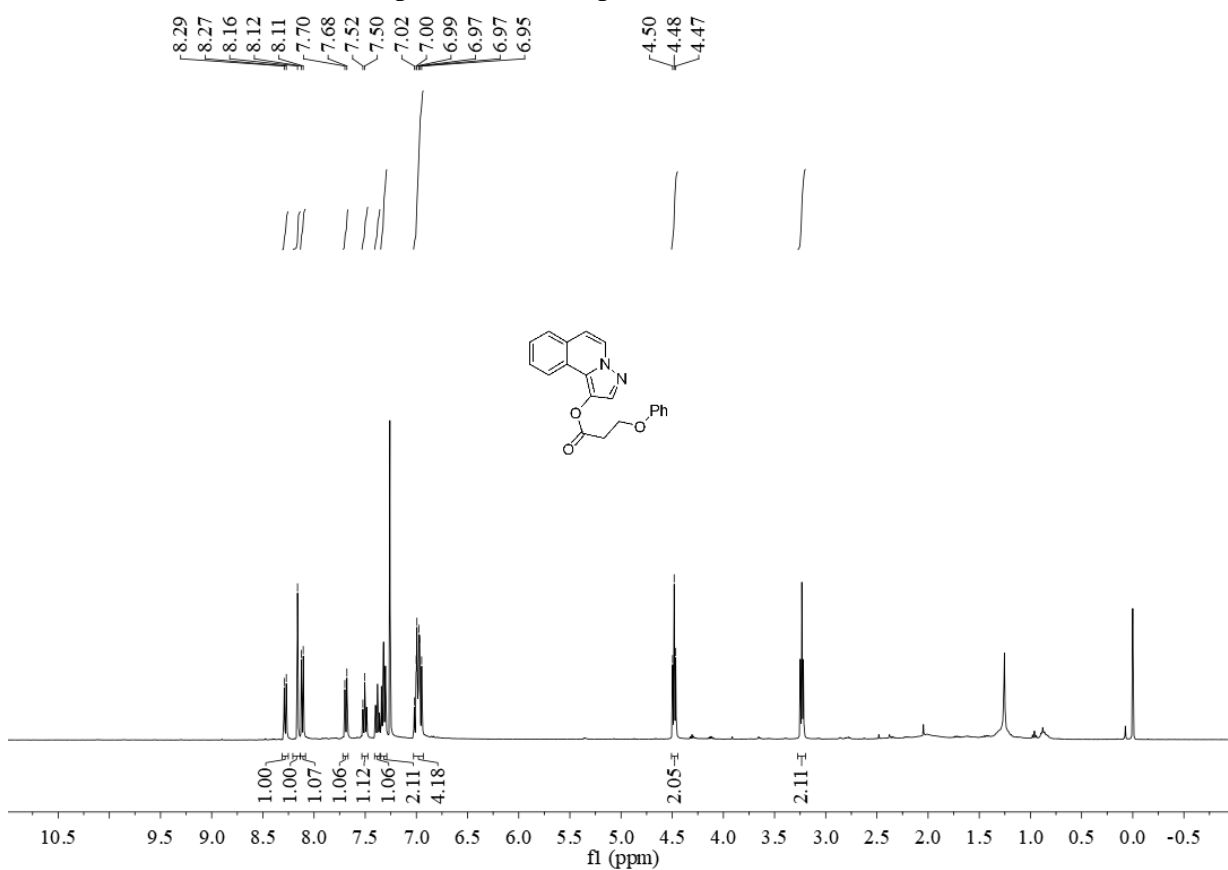

$^{13}\text{C}$  NMR (100 MHz,  $\text{CDCl}_3$ ) spectrum of compound **8e**

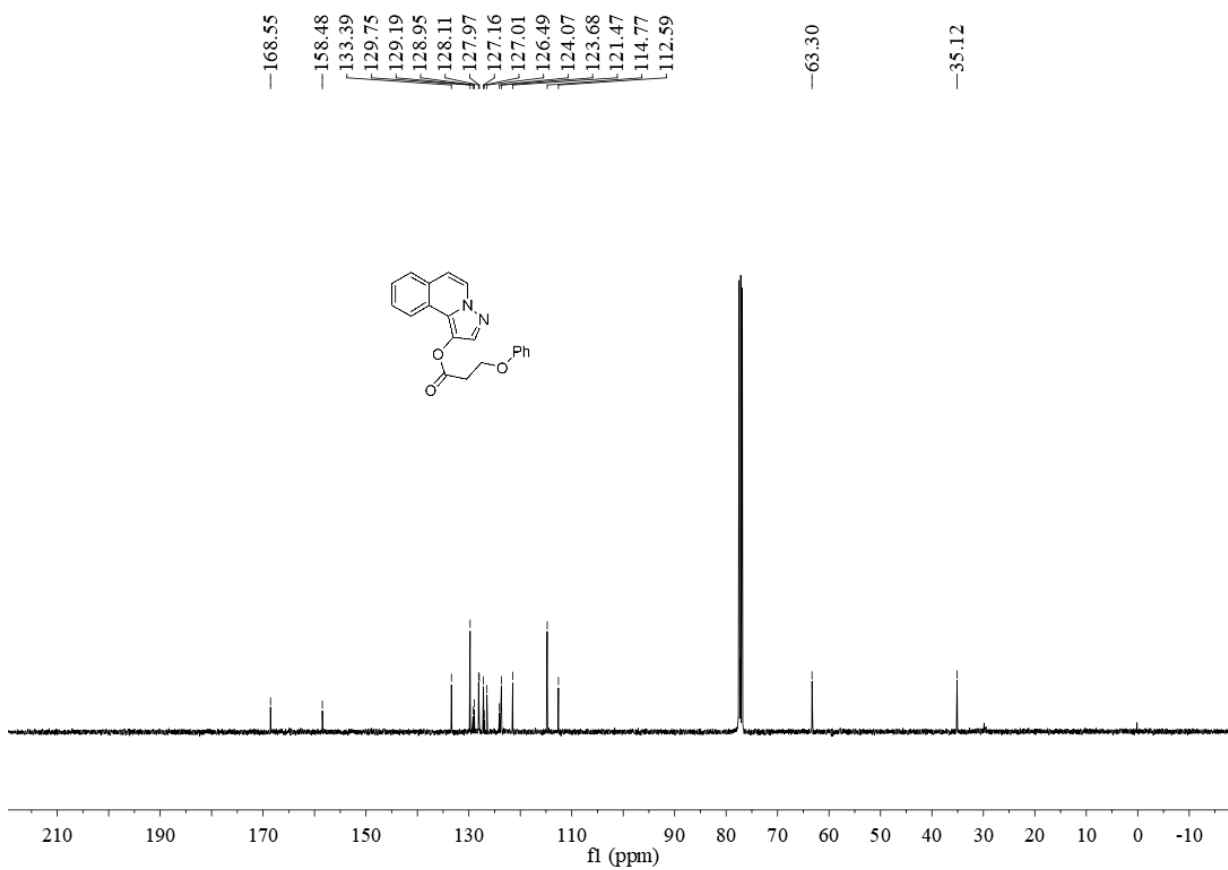

$^1\text{H}$  NMR (400 MHz,  $\text{CDCl}_3$ ) spectrum of compound **8f**

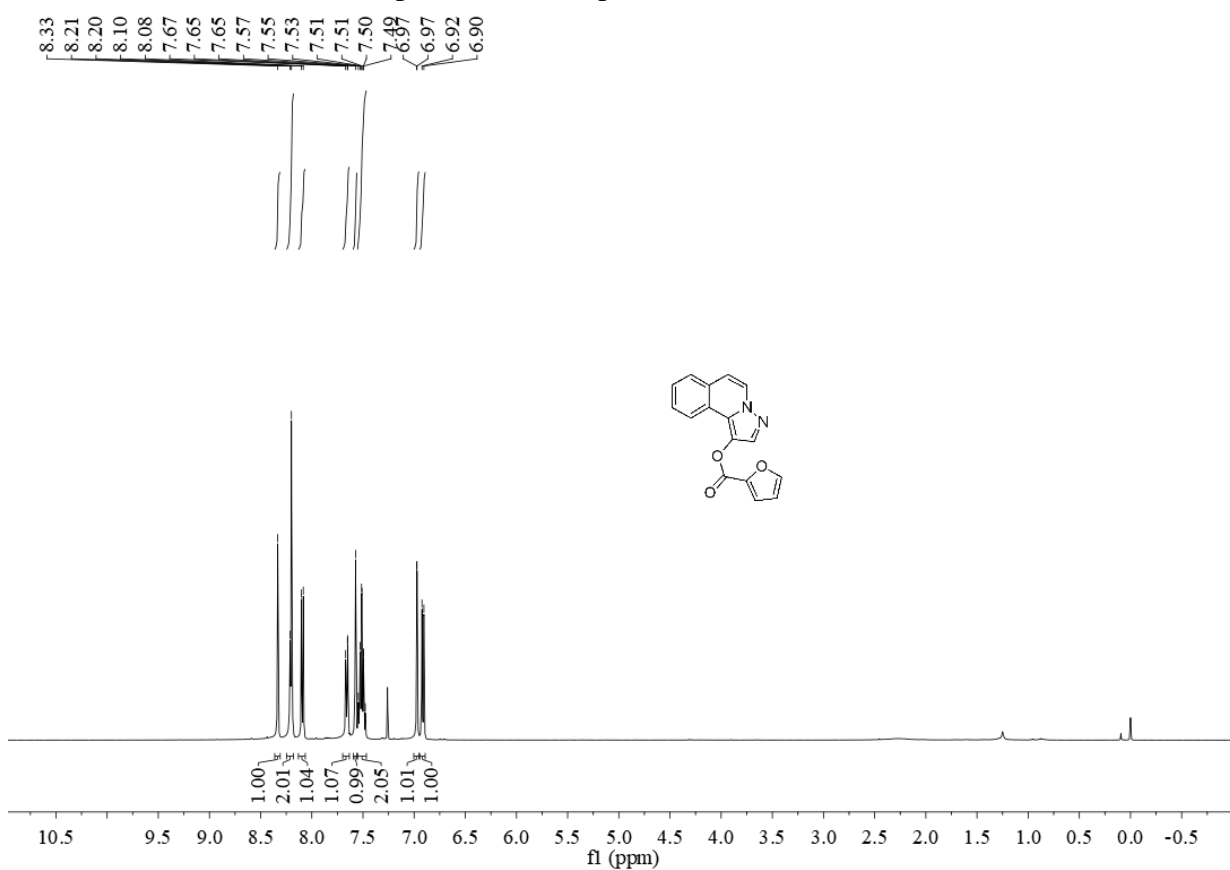

$^{13}\text{C}$  NMR (100 MHz,  $\text{CDCl}_3$ ) spectrum of compound **8f**

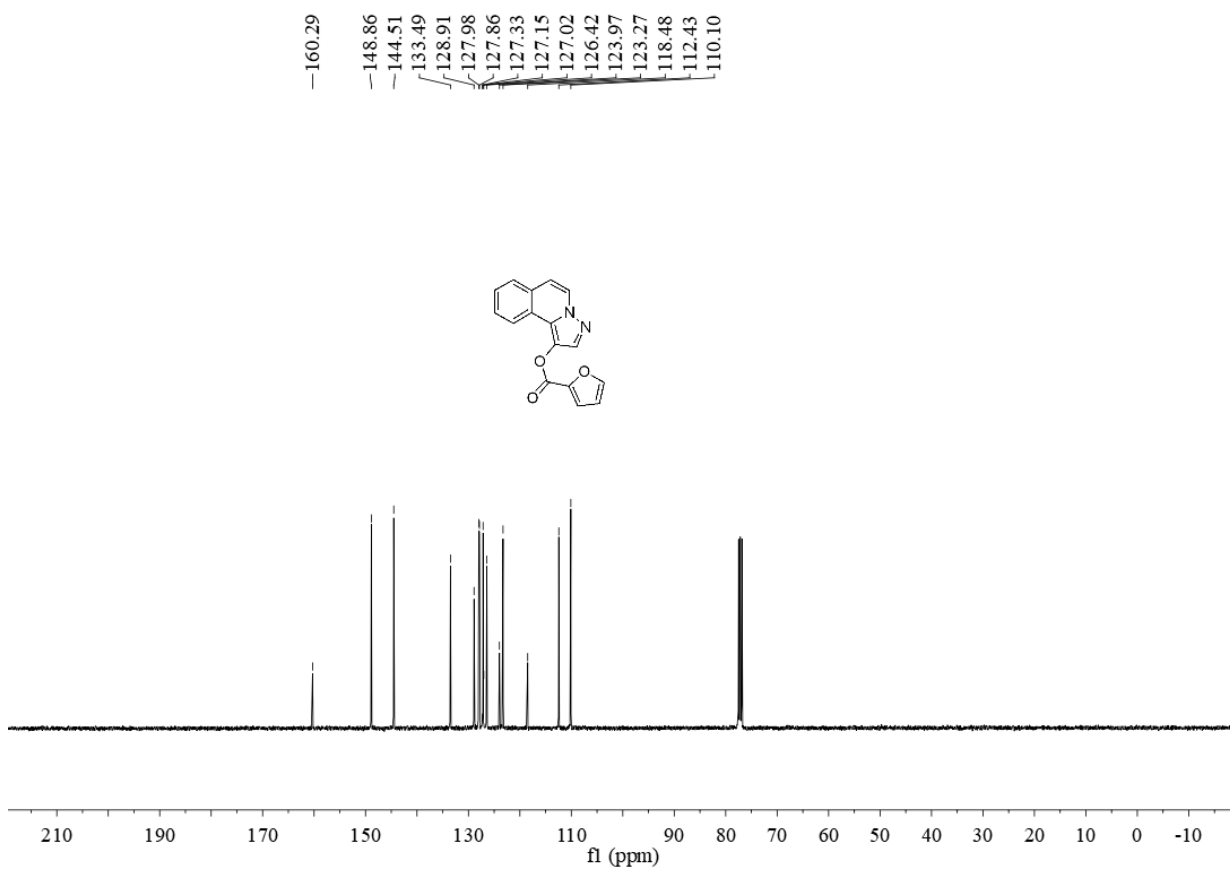

## 4. X-ray crystallographic data

Figure S1 X-ray single crystal structure of **7g**

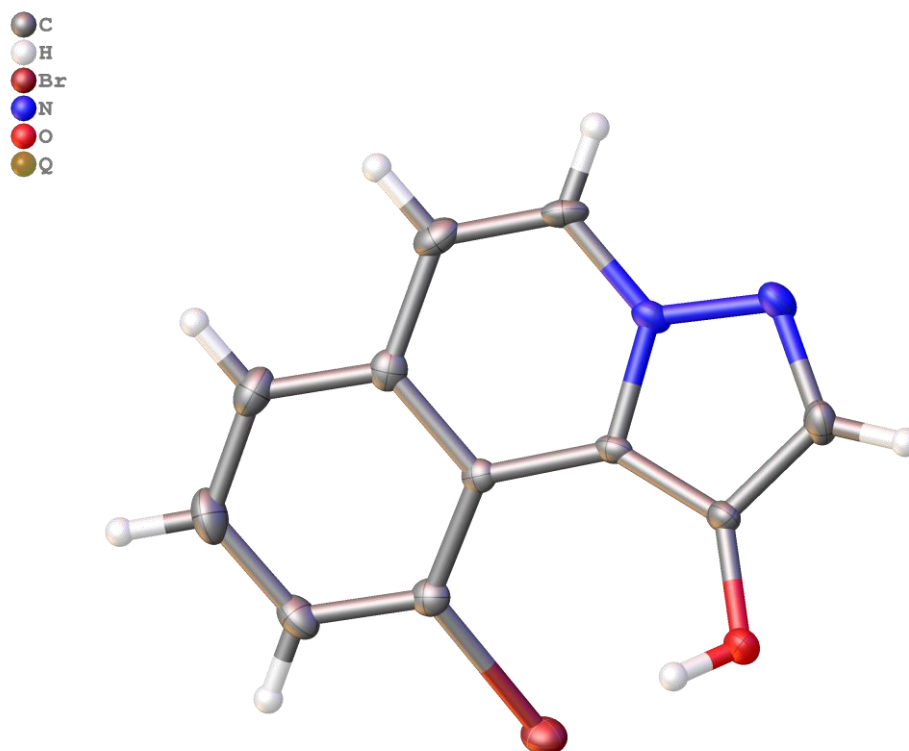

Single crystals of **7g** were grown by slow evaporation of its EA/PE solution. Single-crystal X-ray diffraction data were collected with a 'multiwire proportional' diffractometer. The crystal was kept at 219.99 K during data collection. Using Olex2, the structure was solved with the olex2.solve structure solution program using Charge Flipping and refined with the olex2.refine refinement package using Least Squares minimization. Supplementary crystallographic data have been deposited at the Cambridge Crystallographic Data Center (CCDC 2121364).

**Table S1** Crystal data and structure refinement for **7g**

|                       |                                                   |
|-----------------------|---------------------------------------------------|
| Identification code   | <b>7g</b>                                         |
| Empirical formula     | C <sub>11</sub> H <sub>7</sub> BrN <sub>2</sub> O |
| Formula weight        | 263.10                                            |
| Temperature/K         | 219.99(10)                                        |
| Crystal system        | monoclinic                                        |
| Space group           | P2 <sub>1</sub> /n                                |
| a/Å                   | 8.5927(13)                                        |
| b/Å                   | 10.6826(11)                                       |
| c/Å                   | 11.0184(16)                                       |
| α/°                   | 90                                                |
| β/°                   | 110.950(16)                                       |
| γ/°                   | 90                                                |
| Volume/Å <sup>3</sup> | 944.5(2)                                          |
| Z                     | 4                                                 |

|                                                |                                                               |
|------------------------------------------------|---------------------------------------------------------------|
| $\rho_{\text{calc}}/\text{cm}^3$               | 1.850                                                         |
| $\mu/\text{mm}^{-1}$                           | 4.321                                                         |
| F(000)                                         | 520.0                                                         |
| Crystal size/ $\text{mm}^3$                    | $0.14 \times 0.12 \times 0.1$                                 |
| Radiation                                      | Mo K $\alpha$ ( $\lambda = 0.71073$ )                         |
| $2\Theta$ range for data collection/ $^\circ$  | 5.202 to 49.98                                                |
| Index ranges                                   | $-10 \leq h \leq 9, -12 \leq k \leq 12, -13 \leq l \leq 12$   |
| Reflections collected                          | 3803                                                          |
| Independent reflections                        | 1667 [ $R_{\text{int}} = 0.0337, R_{\text{sigma}} = 0.0538$ ] |
| Data/restraints/parameters                     | 1667/0/137                                                    |
| Goodness-of-fit on $F^2$                       | 1.047                                                         |
| Final R indexes [ $I \geq 2\sigma(I)$ ]        | $R_1 = 0.0345, wR_2 = 0.0610$                                 |
| Final R indexes [all data]                     | $R_1 = 0.0501, wR_2 = 0.0651$                                 |
| Largest diff. peak/hole / $e \text{ \AA}^{-3}$ | 0.40/-0.43                                                    |

**Table S2** Bond Lengths for **7g**

| Atom | Atom | Length/ $\text{\AA}$ | Atom | Atom | Length/ $\text{\AA}$ |
|------|------|----------------------|------|------|----------------------|
| Br1  | C5   | 1.895(4)             | C2   | C3   | 1.377(5)             |
| O1   | C10  | 1.363(4)             | C3   | C4   | 1.373(5)             |
| N1   | N2   | 1.348(4)             | C4   | C5   | 1.376(5)             |
| N1   | C8   | 1.372(4)             | C5   | C6   | 1.409(4)             |
| N1   | C9   | 1.402(4)             | C6   | C9   | 1.444(4)             |
| N2   | C11  | 1.329(4)             | C7   | C8   | 1.326(5)             |
| C1   | C2   | 1.403(5)             | C9   | C10  | 1.389(4)             |
| C1   | C6   | 1.413(5)             | C10  | C11  | 1.391(4)             |
| C1   | C7   | 1.450(4)             |      |      |                      |

**Table S3** Bond Angles for **7g**

| Atom | Atom | Atom | Angle/ $^\circ$ | Atom | Atom | Atom | Angle/ $^\circ$ |
|------|------|------|-----------------|------|------|------|-----------------|
| N2   | N1   | C8   | 122.6(3)        | C1   | C6   | C9   | 117.7(3)        |
| N2   | N1   | C9   | 112.4(3)        | C5   | C6   | C1   | 116.5(3)        |
| C8   | N1   | C9   | 123.8(3)        | C5   | C6   | C9   | 125.8(3)        |
| C11  | N2   | N1   | 105.0(2)        | C8   | C7   | C1   | 120.8(3)        |
| C2   | C1   | C6   | 120.7(3)        | C7   | C8   | N1   | 119.7(3)        |
| C2   | C1   | C7   | 119.6(3)        | N1   | C9   | C6   | 116.6(3)        |
| C6   | C1   | C7   | 119.6(3)        | C10  | C9   | N1   | 104.0(3)        |
| C3   | C2   | C1   | 119.8(4)        | C10  | C9   | C6   | 139.2(3)        |
| C4   | C3   | C2   | 120.3(3)        | O1   | C10  | C9   | 131.2(3)        |
| C3   | C4   | C5   | 120.3(3)        | O1   | C10  | C11  | 122.2(3)        |
| C4   | C5   | Br1  | 116.0(3)        | C9   | C10  | C11  | 106.5(3)        |

|    |    |     |          |    |     |     |          |
|----|----|-----|----------|----|-----|-----|----------|
| C4 | C5 | C6  | 121.6(3) | N2 | C11 | C10 | 112.0(3) |
| C6 | C5 | Br1 | 122.0(3) |    |     |     |          |

## 5. References

1. W. Dai, C. Li, Y. Liu, X. Han, X. Li, K. Chen, H. Liu, *Org. Chem. Front.*, 2020,**7**, 2612-2617.
2. Y. Li, M. Cui, F. Sha, Q. Li, X. Wu, *Org. Biomol. Chem.*, 2019,**17**, 8963-8968.
3. L. Fang, L. Chen, J. Yu, L. Wang, *Eur. J. Org. Chem.*, 2015, **9**, 1910-1914.
4. K. Tanji, T. Sasahara, J. Suzuki, T. Higashino, *Heterocycles*, 1993, **35**, 915.
5. Y. Bao, M. Baiyin, B. Agula, M. Jia, B. Zhaorigetu, *J. Org. Chem.*, 2014, **79**, 6715–6719.
